# Supplementary material for: The ultrafine powder of atractylodis macrocephalae rhizoma improves immune function in naturally aging rats by regulating the PI3K/Akt/NF-κB signaling pathway
Source: Front Pharmacol. 2025 Apr 4;16:1550357. doi: 10.3389/fphar.2025.1550357 (PMC12006087; doi:10.3389/fphar.2025.1550357)
Supplement: Supplementary file 4 [file Table1.xlsx]

## Sheet: Sheet1
Supplementary Table S1 | Characteristics of active ingredients in BZ
NO.	CAS	SMILE number	Molecule Name	Molecular Formula	Gene names	Uniprot	Geng names
1	1135-24-6	COC1=C(C=CC(=C1)C=CC(=O)O)O	Ferulic Acid	C10H10O4	Prostaglandin G/H synthase 1	P23219	PTGS1
1	1135-24-6	COC1=C(C=CC(=C1)C=CC(=O)O)O	Ferulic Acid	C10H10O4	Prostaglandin G/H synthase 2	P35354	PTGS2
1	1135-24-6	COC1=C(C=CC(=C1)C=CC(=O)O)O	Ferulic Acid	C10H10O4	Nitric-oxide synthase, endothelial	P29474	NOS3
1	1135-24-6	COC1=C(C=CC(=C1)C=CC(=O)O)O	Ferulic Acid	C10H10O4	Alpha-2A adrenergic receptor	P08913	ADRA2A
1	1135-24-6	COC1=C(C=CC(=C1)C=CC(=O)O)O	Ferulic Acid	C10H10O4	Sodium-dependent noradrenaline transporter	P23975	SLC6A2
1	1135-24-6	COC1=C(C=CC(=C1)C=CC(=O)O)O	Ferulic Acid	C10H10O4	Alpha-1A adrenergic receptor	P35348	ADRA1A
1	1135-24-6	COC1=C(C=CC(=C1)C=CC(=O)O)O	Ferulic Acid	C10H10O4	Alpha-2B adrenergic receptor	P18089	ADRA2B
1	1135-24-6	COC1=C(C=CC(=C1)C=CC(=O)O)O	Ferulic Acid	C10H10O4	Sodium-dependent dopamine transporter	Q01959	SLC6A3
1	1135-24-6	COC1=C(C=CC(=C1)C=CC(=O)O)O	Ferulic Acid	C10H10O4	Beta-2 adrenergic receptor	P07550	ADRB2
1	1135-24-6	COC1=C(C=CC(=C1)C=CC(=O)O)O	Ferulic Acid	C10H10O4	Urokinase-type plasminogen activator	P00749	PLAU
1	1135-24-6	COC1=C(C=CC(=C1)C=CC(=O)O)O	Ferulic Acid	C10H10O4	Heat shock protein HSP 90-alpha	P07900	HSP90AA1
1	1135-24-6	COC1=C(C=CC(=C1)C=CC(=O)O)O	Ferulic Acid	C10H10O4	Leukotriene A-4 hydrolase	P09960	LTA4H
1	1135-24-6	COC1=C(C=CC(=C1)C=CC(=O)O)O	Ferulic Acid	C10H10O4	Amine oxidase [flavin-containing] B	P27338	MAOB
1	1135-24-6	COC1=C(C=CC(=C1)C=CC(=O)O)O	Ferulic Acid	C10H10O4	Amine oxidase [flavin-containing] A	P21397	MAOA
1	1135-24-6	COC1=C(C=CC(=C1)C=CC(=O)O)O	Ferulic Acid	C10H10O4	cAMP-dependent protein kinase catalytic subunit alpha	P17612	PRKACA
1	1135-24-6	COC1=C(C=CC(=C1)C=CC(=O)O)O	Ferulic Acid	C10H10O4	Chymotrypsinogen B	P17538	CTRB1
2	119439-22-4	CC1=CC=C(CC1=O)C(C)C	2-methyl-5-propan-2-ylcyclohexa-2,4-dien-1-one	C10H14O	Acyl coenzyme A:cholesterol acyltransferase	P23141	CES1
2	119439-22-4	CC1=CC=C(CC1=O)C(C)C	2-Methyl-5-propan-2-ylcyclohexa-2,4-dien-1-one	C10H14O	Mannose-6-phosphate isomerase	P34949	MPI
2	119439-22-4	CC1=CC=C(CC1=O)C(C)C	2-Methyl-5-propan-2-ylcyclohexa-2,4-dien-1-one	C10H14O	Carboxylesterase 2	O00748	CES2
2	119439-22-4	CC1=CC=C(CC1=O)C(C)C	2-Methyl-5-propan-2-ylcyclohexa-2,4-dien-1-one	C10H14O	Macrophage scavenger receptor types I and II	P21757	MSR1
2	119439-22-4	CC1=CC=C(CC1=O)C(C)C	2-Methyl-5-propan-2-ylcyclohexa-2,4-dien-1-one	C10H14O	Cytochrome P450 19A1	P11511	CYP19A1
2	119439-22-4	CC1=CC=C(CC1=O)C(C)C	2-Methyl-5-propan-2-ylcyclohexa-2,4-dien-1-one	C10H14O	Tyrosine-protein kinase FYN	P06241	FYN
2	119439-22-4	CC1=CC=C(CC1=O)C(C)C	2-Methyl-5-propan-2-ylcyclohexa-2,4-dien-1-one	C10H14O	Muscarinic acetylcholine receptor M2	P08172	CHRM2
3	459-80-3	CC(=CCCC(=CC(=O)O)C)C	Trans-geranic acid	C10H16O2	Prostaglandin G/H synthase 1	P23219	PTGS1
3	459-80-3	CC(=CCCC(=CC(=O)O)C)C	Trans-geranic acid	C10H16O2	Prothrombin	P00734	F2
3	459-80-3	CC(=CCCC(=CC(=O)O)C)C	Trans-geranic acid	C10H16O2	Ribosyldihydronicotinamide dehydrogenase [quinone]	P16083	NQO2
3	459-80-3	CC(=CCCC(=CC(=O)O)C)C	Trans-geranic acid	C10H16O2	Prostaglandin G/H synthase 2	P35354	PTGS2
3	459-80-3	CC(=CCCC(=CC(=O)O)C)C	Trans-geranic acid	C10H16O2	Carbonic anhydrase 1	O43570	CA12
3	459-80-3	CC(=CCCC(=CC(=O)O)C)C	Trans-geranic acid	C10H16O2	Sodium-dependent noradrenaline transporter	P23975	SLC6A2
3	459-80-3	CC(=CCCC(=CC(=O)O)C)C	Trans-geranic acid	C10H16O2	Beta-2 adrenergic receptor	P07550	ADRB2
3	459-80-3	CC(=CCCC(=CC(=O)O)C)C	Trans-geranic acid	C10H16O2	Leukotriene A-4 hydrolase	P09960	LTA4H
3	459-80-3	CC(=CCCC(=CC(=O)O)C)C	Trans-geranic acid	C10H16O2	Amine oxidase [flavin-containing] B	P27338	MAOB
3	459-80-3	CC(=CCCC(=CC(=O)O)C)C	Trans-geranic acid	C10H16O2	cAMP-dependent protein kinase catalytic subunit alpha	P17612	PRKACA
3	459-80-3	CC(=CCCC(=CC(=O)O)C)C	Trans-geranic acid	C10H16O2	Queuine tRNA-ribosyltransferase	Q9BXR0	QTRT1
3	459-80-3	CC(=CCCC(=CC(=O)O)C)C	Trans-geranic acid	C10H16O2	Glutamate receptor 2	P42262	GRIA2
4	17216-08-9	CC(=O)C1CCC2=CC=CC=C2C1=O	Acetyltetralone	C12H12O2	Cytochrome P450 24A1	Q07973	CYP24A1
4	17216-08-9	CC(=O)C1CCC2=CC=CC=C2C1=O	Acetyltetralone	C12H12O2	Cytochrome P450 19A1	P11511	CYP19A1
4	17216-08-9	CC(=O)C1CCC2=CC=CC=C2C1=O	Acetyltetralone	C12H12O2	Cytochrome P450 11B1	P15538	CYP11B1
4	17216-08-9	CC(=O)C1CCC2=CC=CC=C2C1=O	Acetyltetralone	C12H12O2	Cytochrome P450 11B2	P19099	CYP11B2
4	17216-08-9	CC(=O)C1CCC2=CC=CC=C2C1=O	Acetyltetralone	C12H12O2	Nitric oxide synthase, inducible	P35228	NOS2
4	17216-08-9	CC(=O)C1CCC2=CC=CC=C2C1=O	Acetyltetralone	C12H12O2	Poly [ADP-ribose] polymerase-1	P09874	PARP1
4	17216-08-9	CC(=O)C1CCC2=CC=CC=C2C1=O	Acetyltetralone	C12H12O2	Induced myeloid leukemia cell differentiation protein Mcl-1	Q07820	MCL1
4	17216-08-9	CC(=O)C1CCC2=CC=CC=C2C1=O	Acetyltetralone	C12H12O2	Monoglyceride lipase	Q99685	MGLL
4	17216-08-9	CC(=O)C1CCC2=CC=CC=C2C1=O	Acetyltetralone	C12H12O2	Poly [ADP-ribose] polymerase 3	Q9Y6F1	PARP3
4	17216-08-9	CC(=O)C1CCC2=CC=CC=C2C1=O	Acetyltetralone	C12H12O2	Phosphodiesterase 5A	O76074	PDE5A
4	17216-08-9	CC(=O)C1CCC2=CC=CC=C2C1=O	Acetyltetralone	C12H12O2	Phosphodiesterase 3	Q14432	PDE3A
4	17216-08-9	CC(=O)C1CCC2=CC=CC=C2C1=O	Acetyltetralone	C12H12O2	Phosphodiesterase 3B	Q13370	PDE3B
4	17216-08-9	CC(=O)C1CCC2=CC=CC=C2C1=O	Acetyltetralone	C12H12O2	Epidermal growth factor receptor erbB1	P00533	EGFR
4	17216-08-9	CC(=O)C1CCC2=CC=CC=C2C1=O	Acetyltetralone	C12H12O2	Macrophage migration inhibitory factor	P14174	MIF
4	17216-08-9	CC(=O)C1CCC2=CC=CC=C2C1=O	Acetyltetralone	C12H12O2	Cathepsin K	P43235	CTSK
4	17216-08-9	CC(=O)C1CCC2=CC=CC=C2C1=O	Acetyltetralone	C12H12O2	Cathepsin S	P25774	CTSS
4	17216-08-9	CC(=O)C1CCC2=CC=CC=C2C1=O	Acetyltetralone	C12H12O2	Cathepsin (B and K)	P07858	CTSB
4	17216-08-9	CC(=O)C1CCC2=CC=CC=C2C1=O	Acetyltetralone	C12H12O2	Sigma opioid receptor	Q99720	SIGMAR1
4	17216-08-9	CC(=O)C1CCC2=CC=CC=C2C1=O	Acetyltetralone	C12H12O2	Testis-specific androgen-binding protein	P04278	SHBG
4	17216-08-9	CC(=O)C1CCC2=CC=CC=C2C1=O	Acetyltetralone	C12H12O2	Dipeptidyl peptidase I	P53634	CTSC
4	17216-08-9	CC(=O)C1CCC2=CC=CC=C2C1=O	Acetyltetralone	C12H12O2	Acyl coenzyme A:cholesterol acyltransferase 1	P35610	SOAT1
4	17216-08-9	CC(=O)C1CCC2=CC=CC=C2C1=O	Acetyltetralone	C12H12O2	Telomerase reverse transcriptase	O14746	TERT
4	17216-08-9	CC(=O)C1CCC2=CC=CC=C2C1=O	Acetyltetralone	C12H12O2	Glycogen synthase kinase-3 beta	P49841	GSK3B
4	17216-08-9	CC(=O)C1CCC2=CC=CC=C2C1=O	Acetyltetralone	C12H12O2	N-acylsphingosine-amidohydrolase	Q02083	NAAA
4	17216-08-9	CC(=O)C1CCC2=CC=CC=C2C1=O	Acetyltetralone	C12H12O2	Angiotensin-converting enzyme	P12821	ACE
4	17216-08-9	CC(=O)C1CCC2=CC=CC=C2C1=O	Acetyltetralone	C12H12O2	Adenosine A3 receptor	P0DMS8	ADORA3
4	17216-08-9	CC(=O)C1CCC2=CC=CC=C2C1=O	Acetyltetralone	C12H12O2	Protein-glutamine gamma-glutamyltransferase	P21980	TGM2
4	17216-08-9	CC(=O)C1CCC2=CC=CC=C2C1=O	Acetyltetralone	C12H12O2	Sterol 26-hydroxylase, mitochondrial	Q02318	CYP27A1
4	17216-08-9	CC(=O)C1CCC2=CC=CC=C2C1=O	Acetyltetralone	C12H12O2	Lysine-specific demethylase 4D-like	B2RXH2	KDM4E
4	17216-08-9	CC(=O)C1CCC2=CC=CC=C2C1=O	Acetyltetralone	C12H12O2	Dihydroorotate dehydrogenase	Q02127	DHODH
4	17216-08-9	CC(=O)C1CCC2=CC=CC=C2C1=O	Acetyltetralone	C12H12O2	Tyrosyl-DNA phosphodiesterase 2	O95551	TDP2
4	17216-08-9	CC(=O)C1CCC2=CC=CC=C2C1=O	Acetyltetralone	C12H12O2	Carbonic anhydrase XII	O43570	CA12
4	17216-08-9	CC(=O)C1CCC2=CC=CC=C2C1=O	Acetyltetralone	C12H12O2	Mucosa-associated lymphoid tissue lymphoma translocation protein 1	Q9UDY8	MALT1
4	17216-08-9	CC(=O)C1CCC2=CC=CC=C2C1=O	Acetyltetralone	C12H12O2	c-Jun N-terminal kinase 1	P45983	MAPK8
4	17216-08-9	CC(=O)C1CCC2=CC=CC=C2C1=O	Acetyltetralone	C12H12O2	Prolyl endopeptidase	P48147	PREP
4	17216-08-9	CC(=O)C1CCC2=CC=CC=C2C1=O	Acetyltetralone	C12H12O2	Fibroblast activation protein alpha	Q12884	FAP
4	17216-08-9	CC(=O)C1CCC2=CC=CC=C2C1=O	Acetyltetralone	C12H12O2	Acyl coenzyme A:cholesterol acyltransferase	P23141	CES1
4	17216-08-9	CC(=O)C1CCC2=CC=CC=C2C1=O	Acetyltetralone	C12H12O2	Carboxylesterase 2	O00748	CES2
4	17216-08-9	CC(=O)C1CCC2=CC=CC=C2C1=O	Acetyltetralone	C12H12O2	Myeloperoxidase	P05164	MPO
4	17216-08-9	CC(=O)C1CCC2=CC=CC=C2C1=O	Acetyltetralone	C12H12O2	Aldose reductase	P15121	AKR1B1
4	17216-08-9	CC(=O)C1CCC2=CC=CC=C2C1=O	Acetyltetralone	C12H12O2	Leukocyte common antigen	P08575	PTPRC
4	17216-08-9	CC(=O)C1CCC2=CC=CC=C2C1=O	Acetyltetralone	C12H12O2	Cathepsin L	P07711	CTSL
4	17216-08-9	CC(=O)C1CCC2=CC=CC=C2C1=O	Acetyltetralone	C12H12O2	Toll-like receptor (TLR7/TLR9)	Q9NR96	TLR9
4	17216-08-9	CC(=O)C1CCC2=CC=CC=C2C1=O	Acetyltetralone	C12H12O2	DNA topoisomerase II alpha	P11388	TOP2A
4	17216-08-9	CC(=O)C1CCC2=CC=CC=C2C1=O	Acetyltetralone	C12H12O2	Melatonin receptor 1A	P48039	MTNR1A
4	17216-08-9	CC(=O)C1CCC2=CC=CC=C2C1=O	Acetyltetralone	C12H12O2	Melatonin receptor 1B	P49286	MTNR1B
4	17216-08-9	CC(=O)C1CCC2=CC=CC=C2C1=O	Acetyltetralone	C12H12O2	Alcohol dehydrogenase beta chain	P00325	ADH1B
4	17216-08-9	CC(=O)C1CCC2=CC=CC=C2C1=O	Acetyltetralone	C12H12O2	Alcohol dehydrogenase gamma chain	P00326	ADH1C
4	17216-08-9	CC(=O)C1CCC2=CC=CC=C2C1=O	Acetyltetralone	C12H12O2	Tyrosine-protein kinase JAK2	O60674	JAK2
4	17216-08-9	CC(=O)C1CCC2=CC=CC=C2C1=O	Acetyltetralone	C12H12O2	Tyrosine-protein kinase TYK2	P29597	TYK2
4	17216-08-9	CC(=O)C1CCC2=CC=CC=C2C1=O	Acetyltetralone	C12H12O2	Dual specificity mitogen-activated protein kinase kinase 1	Q02750	MAP2K1
4	17216-08-9	CC(=O)C1CCC2=CC=CC=C2C1=O	Acetyltetralone	C12H12O2	Cytochrome P450 2A6	P11509	CYP2A6
4	17216-08-9	CC(=O)C1CCC2=CC=CC=C2C1=O	Acetyltetralone	C12H12O2	Dual specificity protein phosphatase 1	P28562	DUSP1
4	17216-08-9	CC(=O)C1CCC2=CC=CC=C2C1=O	Acetyltetralone	C12H12O2	Alcohol dehydrogenase alpha chain	P07327	ADH1A
4	17216-08-9	CC(=O)C1CCC2=CC=CC=C2C1=O	Acetyltetralone	C12H12O2	LXR-alpha	Q13133	NR1H3
5	64997-52-0	CC(CCC=C(C)C)C1CCC(=C)C=C1	(3S)-3-[(1R)-1,5-dimethylhex-4-enyl]-6-methylenecyclohexene	C15H24	LXR-beta	P55055	NR1H2
5	64997-52-0	CC(CCC=C(C)C)C1CCC(=C)C=C1	(3S)-3-[(1R)-1,5-dimethylhex-4-enyl]-6-methylenecyclohexene	C15H24	Bromodomain-containing protein 4	O60885	BRD4
5	64997-52-0	CC(CCC=C(C)C)C1CCC(=C)C=C1	(3S)-3-[(1R)-1,5-dimethylhex-4-enyl]-6-methylenecyclohexene	C15H24	Glutathione S-transferase Pi	P09211	GSTP1
5	64997-52-0	CC(CCC=C(C)C)C1CCC(=C)C=C1	(3S)-3-[(1R)-1,5-dimethylhex-4-enyl]-6-methylenecyclohexene	C15H24	Lysine-specific demethylase 4C	Q9H3R0	KDM4C
6	55290-63-6	CC=CC#CC#CC=CC1=CC=CO1	Atractylodin	C13H10O	Metabotropic glutamate receptor 5	P41594	GRM5
6	55290-63-6	CC=CC#CC#CC=CC1=CC=CO1	Atractylodin	C13H10O	Cytochrome P450 11B1	P15538	CYP11B1
6	55290-63-6	CC=CC#CC#CC=CC1=CC=CO1	Atractylodin	C13H10O	Cytochrome P450 11B2	P19099	CYP11B2
6	55290-63-6	CC=CC#CC#CC=CC1=CC=CO1	Atractylodin	C13H10O	Troponin, cardiac muscle	P63316	TNNC1
6	55290-63-6	CC=CC#CC#CC=CC1=CC=CO1	Atractylodin	C13H10O	Dopamine transporter	Q01959	SLC6A3
6	55290-63-6	CC=CC#CC#CC=CC1=CC=CO1	Atractylodin	C13H10O	Dipeptidyl peptidase I	P53634	CTSC
6	55290-63-6	CC=CC#CC#CC=CC1=CC=CO1	Atractylodin	C13H10O	Cathepsin F	Q9UBX1	CTSF
6	55290-63-6	CC=CC#CC#CC=CC1=CC=CO1	Atractylodin	C13H10O	Cathepsin K	P43235	CTSK
6	55290-63-6	CC=CC#CC#CC=CC1=CC=CO1	Atractylodin	C13H10O	Cathepsin S	P25774	CTSS
6	55290-63-6	CC=CC#CC#CC=CC1=CC=CO1	Atractylodin	C13H10O	Cathepsin (V and K)	O60911	CTSV
6	55290-63-6	CC=CC#CC#CC=CC1=CC=CO1	Atractylodin	C13H10O	Cathepsin L	P07711	CTSL
6	55290-63-6	CC=CC#CC#CC=CC1=CC=CO1	Atractylodin	C13H10O	Cathepsin (B and K)	P07858	CTSB
6	55290-63-6	CC=CC#CC#CC=CC1=CC=CO1	Atractylodin	C13H10O	Toll-like receptor (TLR7/TLR9)	Q9NR96	TLR9
6	55290-63-6	CC=CC#CC#CC=CC1=CC=CO1	Atractylodin	C13H10O	Transient receptor potential cation channel subfamily A member 1	O75762	TRPA1
6	55290-63-6	CC=CC#CC#CC=CC1=CC=CO1	Atractylodin	C13H10O	Orexin receptor 1	O43613	HCRTR1
6	55290-63-6	CC=CC#CC#CC=CC1=CC=CO1	Atractylodin	C13H10O	Adenosine A1 receptor	P30542	ADORA1
6	55290-63-6	CC=CC#CC#CC=CC1=CC=CO1	Atractylodin	C13H10O	Adenosine A2a receptor	P29274	ADORA2A
6	55290-63-6	CC=CC#CC#CC=CC1=CC=CO1	Atractylodin	C13H10O	Dual specificity phosphatase Cdc25B	P30305	CDC25B
6	55290-63-6	CC=CC#CC#CC=CC1=CC=CO1	Atractylodin	C13H10O	Serotonin transporter	P31645	SLC6A4
6	55290-63-6	CC=CC#CC#CC=CC1=CC=CO1	Atractylodin	C13H10O	Tyrosine-protein kinase receptor FLT3	P36888	FLT3
6	55290-63-6	CC=CC#CC#CC=CC1=CC=CO1	Atractylodin	C13H10O	Estradiol 17-beta-dehydrogenase 2	P37059	HSD17B2
7	484-12-8	CC(=CCC1=C(C=CC2=C1OC(=O)C=C2)OC)C	Osthol	C15H16O3	Prostaglandin G/H synthase 1	P23219	PTGS1
7	484-12-8	CC(=CCC1=C(C=CC2=C1OC(=O)C=C2)OC)C	Osthol	C15H16O3	Muscarinic acetylcholine receptor M3	P20309	CHRM3
7	484-12-8	CC(=CCC1=C(C=CC2=C1OC(=O)C=C2)OC)C	Osthol	C15H16O3	Muscarinic acetylcholine receptor M1	P11229	CHRM1
7	484-12-8	CC(=CCC1=C(C=CC2=C1OC(=O)C=C2)OC)C	Osthol	C15H16O3	Estrogen receptor	P03372	ESR1
7	484-12-8	CC(=CCC1=C(C=CC2=C1OC(=O)C=C2)OC)C	Osthol	C15H16O3	Sodium channel protein type 5 subunit alpha	Q14524	SCN5A
7	484-12-8	CC(=CCC1=C(C=CC2=C1OC(=O)C=C2)OC)C	Osthol	C15H16O3	Prostaglandin G/H synthase 2	P35354	PTGS2
7	484-12-8	CC(=CCC1=C(C=CC2=C1OC(=O)C=C2)OC)C	Osthol	C15H16O3	Retinoic acid receptor RXR-alpha	P19793	RXRA
7	484-12-8	CC(=CCC1=C(C=CC2=C1OC(=O)C=C2)OC)C	Osthol	C15H16O3	cGMP-inhibited 3',5'-cyclic phosphodiesterase A	Q14432	PDE3A
7	484-12-8	CC(=CCC1=C(C=CC2=C1OC(=O)C=C2)OC)C	Osthol	C15H16O3	Sodium-dependent noradrenaline transporter	P23975	SLC6A2
7	484-12-8	CC(=CCC1=C(C=CC2=C1OC(=O)C=C2)OC)C	Osthol	C15H16O3	Alpha-1A adrenergic receptor	P35348	ADRA1A
7	484-12-8	CC(=CCC1=C(C=CC2=C1OC(=O)C=C2)OC)C	Osthol	C15H16O3	Alpha-1B adrenergic receptor	P35368	ADRA1B
7	484-12-8	CC(=CCC1=C(C=CC2=C1OC(=O)C=C2)OC)C	Osthol	C15H16O3	Sodium-dependent dopamine transporter	Q01959	SLC6A3
7	484-12-8	CC(=CCC1=C(C=CC2=C1OC(=O)C=C2)OC)C	Osthol	C15H16O3	Beta-2 adrenergic receptor	P07550	ADRB2
7	484-12-8	CC(=CCC1=C(C=CC2=C1OC(=O)C=C2)OC)C	Osthol	C15H16O3	Neuronal acetylcholine receptor subunit alpha-2	Q15822	CHRNA2
7	484-12-8	CC(=CCC1=C(C=CC2=C1OC(=O)C=C2)OC)C	Osthol	C15H16O3	Sodium-dependent serotonin transporter	P31645	SLC6A4
7	484-12-8	CC(=CCC1=C(C=CC2=C1OC(=O)C=C2)OC)C	Osthol	C15H16O3	Heat shock protein HSP 90-alpha	P07900	HSP90AA1
7	484-12-8	CC(=CCC1=C(C=CC2=C1OC(=O)C=C2)OC)C	Osthol	C15H16O3	Beta-lactamase	Q96BR5	COA7
7	484-12-8	CC(=CCC1=C(C=CC2=C1OC(=O)C=C2)OC)C	Osthol	C15H16O3	Amine oxidase [flavin-containing] B	P27338	MAOB
7	484-12-8	CC(=CCC1=C(C=CC2=C1OC(=O)C=C2)OC)C	Osthol	C15H16O3	Serine/threonine-protein kinase Chk1	O14757	CHEK1
7	484-12-8	CC(=CCC1=C(C=CC2=C1OC(=O)C=C2)OC)C	Osthol	C15H16O3	cAMP-dependent protein kinase catalytic subunit alpha	P17612	PRKACA
7	484-12-8	CC(=CCC1=C(C=CC2=C1OC(=O)C=C2)OC)C	Osthol	C15H16O3	3-hydroxy-3-methylglutaryl-coenzyme A reductase	P04035	HMGCR
7	484-12-8	CC(=CCC1=C(C=CC2=C1OC(=O)C=C2)OC)C	Osthol	C15H16O3	Proto-oncogene serine/threonine-protein kinase Pim-1	P11309	PIM1
7	484-12-8	CC(=CCC1=C(C=CC2=C1OC(=O)C=C2)OC)C	Osthol	C15H16O3	Medium-chain specific acyl-CoA dehydrogenase, mitochondrial	P11310	ACADM
7	484-12-8	CC(=CCC1=C(C=CC2=C1OC(=O)C=C2)OC)C	Osthol	C15H16O3	Cyclin-A2	P20248	CCNA2
7	484-12-8	CC(=CCC1=C(C=CC2=C1OC(=O)C=C2)OC)C	Osthol	C15H16O3	Carnitine O-palmitoyltransferase 1, liver isoform	P50416	CPT1A
8	889062-60-6	CC(=C)C1=CC[C@@]2(C)CCCC(=C)[C@]2(C)C1	atractylenolide Ⅵ	C15H22	Androgen Receptor	P10275	AR
8	889062-60-6	CC(=C)C1=CC[C@@]2(C)CCCC(=C)[C@]2(C)C1	atractylenolide Ⅵ	C15H22	Cytochrome P450 19A1	P11511	CYP19A1
8	889062-60-6	CC(=C)C1=CC[C@@]2(C)CCCC(=C)[C@]2(C)C1	atractylenolide Ⅵ	C15H22	Estrogen receptor alpha	P03372	ESR1
8	889062-60-6	CC(=C)C1=CC[C@@]2(C)CCCC(=C)[C@]2(C)C1	atractylenolide Ⅵ	C15H22	Estrogen receptor beta	Q92731	ESR2
8	889062-60-6	CC(=C)C1=CC[C@@]2(C)CCCC(=C)[C@]2(C)C1	atractylenolide Ⅵ	C15H22	Peroxisome proliferator-activated receptor alpha	Q07869	PPARA
8	889062-60-6	CC(=C)C1=CC[C@@]2(C)CCCC(=C)[C@]2(C)C1	atractylenolide Ⅵ	C15H22	Cannabinoid receptor 2	P34972	CNR2
8	889062-60-6	CC(=C)C1=CC[C@@]2(C)CCCC(=C)[C@]2(C)C1	atractylenolide Ⅵ	C15H22	LXR-alpha	Q13133	NR1H3
8	889062-60-6	CC(=C)C1=CC[C@@]2(C)CCCC(=C)[C@]2(C)C1	atractylenolide Ⅵ	C15H22	Adenosine A1 receptor	P30542	ADORA1
8	889062-60-6	CC(=C)C1=CC[C@@]2(C)CCCC(=C)[C@]2(C)C1	atractylenolide Ⅵ	C15H22	Adenosine A2a receptor	P29274	ADORA2A
8	889062-60-6	CC(=C)C1=CC[C@@]2(C)CCCC(=C)[C@]2(C)C1	atractylenolide Ⅵ	C15H22	Adenosine A3 receptor	P0DMS8	ADORA3
9	27840-40-0	CC1CC=CC2=CCC(=C(C)C)CC12C	(8R,8aS)-2-Isopropylidene-8,8a-dimethyl-1,2,3,7,8,8a-hexahydron aphthalene	C15H22	Adenosine A1 receptor	P30542	ADORA1
9	27840-40-0	CC1CC=CC2=CCC(=C(C)C)CC12C	(8R,8aS)-2-Isopropylidene-8,8a-dimethyl-1,2,3,7,8,8a-hexahydron aphthalene	C15H22	Adenosine A2a receptor	P29274	ADORA2A
9	27840-40-0	CC1CC=CC2=CCC(=C(C)C)CC12C	(8R,8aS)-2-Isopropylidene-8,8a-dimethyl-1,2,3,7,8,8a-hexahydron aphthalene	C15H22	Adenosine A3 receptor	P0DMS8	ADORA3
9	27840-40-0	CC1CC=CC2=CCC(=C(C)C)CC12C	(8R,8aS)-2-Isopropylidene-8,8a-dimethyl-1,2,3,7,8,8a-hexahydron aphthalene	C15H22	Androgen Receptor	P10275	AR
9	27840-40-0	CC1CC=CC2=CCC(=C(C)C)CC12C	(8R,8aS)-2-Isopropylidene-8,8a-dimethyl-1,2,3,7,8,8a-hexahydron aphthalene	C15H22	Estrogen receptor alpha	P03372	ESR1
9	27840-40-0	CC1CC=CC2=CCC(=C(C)C)CC12C	(8R,8aS)-2-Isopropylidene-8,8a-dimethyl-1,2,3,7,8,8a-hexahydron aphthalene	C15H22	Estrogen receptor beta	Q92731	ESR2
9	27840-40-0	CC1CC=CC2=CCC(=C(C)C)CC12C	(8R,8aS)-2-Isopropylidene-8,8a-dimethyl-1,2,3,7,8,8a-hexahydron aphthalene	C15H22	Cytochrome P450 19A1	P11511	CYP19A1
10	489-39-4	CC1CCC2C1C3C(C3(C)C)CCC2=C	Alloaromadendrene	C15H24	Gamma-aminobutyric acid receptor subunit alpha-1	P14867	GABRA1
10	489-39-4	CC1CCC2C1C3C(C3(C)C)CCC2=C	Alloaromadendrene	C15H24	Muscarinic acetylcholine receptor M1	P11229	CHRM1
10	489-39-4	CC1CCC2C1C3C(C3(C)C)CCC2=C	Alloaromadendrene	C15H24	Muscarinic acetylcholine receptor M2	P08172	CHRM2
10	489-39-4	CC1CCC2C1C3C(C3(C)C)CCC2=C	Alloaromadendrene	C15H24	Muscarinic acetylcholine receptor M3	P20309	CHRM3
10	489-39-4	CC1CCC2C1C3C(C3(C)C)CCC2=C	Alloaromadendrene	C15H24	Neuronal acetylcholine receptor subunit alpha-2	Q15822	CHRNA2
11	4176-17-4	CC1=CC=C(C=C1)C(C)CCC=C(C)C	α-curcumene	C15H22	Alpha-1A adrenergic receptor	P35348	ADRA1A
11	4176-17-4	CC1=CC=C(C=C1)C(C)CCC=C(C)C	α-curcumene	C15H22	Amine oxidase [flavin-containing] B	P27338	MAOB
11	4176-17-4	CC1=CC=C(C=C1)C(C)CCC=C(C)C	α-curcumene	C15H22	Muscarinic acetylcholine receptor M1	P11229	CHRM1
11	4176-17-4	CC1=CC=C(C=C1)C(C)CCC=C(C)C	α-curcumene	C15H22	Prostaglandin G/H synthase 2	P35354	PTGS2
11	4176-17-4	CC1=CC=C(C=C1)C(C)CCC=C(C)C	α-curcumene	C15H22	Sodium-dependent dopamine transporter	Q01959	SLC6A3
11	4176-17-4	CC1=CC=C(C=C1)C(C)CCC=C(C)C	α-curcumene	C15H22	Sodium-dependent noradrenaline transporter	P23975	SLC6A2
12	6813-21-4	CC1=CCCC2(C1CC(=C(C)C)CC2)C	Eudesma-3,7(11)-diene	C15H24	Alcohol dehydrogenase 1B	P00325	ADH1B
12	6813-21-4	CC1=CCCC2(C1CC(=C(C)C)CC2)C	Eudesma-3,7(11)-diene	C15H24	Alcohol dehydrogenase 1C	P00326	ADH1C
12	6813-21-4	CC1=CCCC2(C1CC(=C(C)C)CC2)C	Eudesma-3,7(11)-diene	C15H24	Gamma-aminobutyric acid receptor subunit alpha-1	P14867	GABRA1
12	6813-21-4	CC1=CCCC2(C1CC(=C(C)C)CC2)C	Eudesma-3,7(11)-diene	C15H24	Interleukin-1 beta	P01584	IL1B
12	6813-21-4	CC1=CCCC2(C1CC(=C(C)C)CC2)C	Eudesma-3,7(11)-diene	C15H24	Nuclear receptor coactivator 2	Q15596	NCOA2
12	6813-21-4	CC1=CCCC2(C1CC(=C(C)C)CC2)C	Eudesma-3,7(11)-diene	C15H24	Prostaglandin G/H synthase 2	P35354	PTGS2
12	6813-21-4	CC1=CCCC2(C1CC(=C(C)C)CC2)C	Eudesma-3,7(11)-diene	C15H24	Renin, renal	P00797	REN
12	6813-21-4	CC1=CCCC2(C1CC(=C(C)C)CC2)C	Eudesma-3,7(11)-diene	C15H24	Sodium-dependent noradrenaline transporter	P23975	SLC6A2
12	6813-21-4	CC1=CCCC2(C1CC(=C(C)C)CC2)C	Eudesma-3,7(11)-diene	C15H24	Tumor necrosis factor	O00220	TNFRSF10A
13	18794-84-8	CC(=CCCC(=CCCC(=C)C=C)C)C	β-farnesene	C15H24	Gamma-aminobutyric acid receptor subunit alpha-1	P14867	GABRA1
13	18794-84-8	CC(=CCCC(=CCCC(=C)C=C)C)C	β-farnesene	C15H24	Gamma-aminobutyric-acid receptor alpha-2 subunit	P47869	GABRA2
13	18794-84-8	CC(=CCCC(=CCCC(=C)C=C)C)C	β-farnesene	C15H24	Nuclear receptor coactivator 2	Q15596	NCOA2
13	18794-84-8	CC(=CCCC(=CCCC(=C)C=C)C)C	β-farnesene	C15H24	Prostaglandin G/H synthase 2	P35354	PTGS2
13	18794-84-8	CC(=CCCC(=CCCC(=C)C=C)C)C	β-farnesene	C15H24	Sodium-dependent noradrenaline transporter	P23975	SLC6A2
14	473-08-5	CC1=C2CC(CCC2(CCC1=O)C)C(=C)C	α-cyperone	C15H22O	Steroid 5-alpha-reductase 1	P18405	SRD5A1
14	473-08-5	CC1=C2CC(CCC2(CCC1=O)C)C(=C)C	α-cyperone	C15H22O	Steroid 5-alpha-reductase 2	P31213	SRD5A2
14	473-08-5	CC1=C2CC(CCC2(CCC1=O)C)C(=C)C	α-cyperone	C15H22O	Cytochrome P450 19A1	P11511	CYP19A1
14	473-08-5	CC1=C2CC(CCC2(CCC1=O)C)C(=C)C	α-cyperone	C15H22O	Nuclear receptor subfamily 1 group I member 3	Q14994	NR1I3
14	473-08-5	CC1=C2CC(CCC2(CCC1=O)C)C(=C)C	α-cyperone	C15H22O	Cytochrome P450 17A1	P05093	CYP17A1
14	473-08-5	CC1=C2CC(CCC2(CCC1=O)C)C(=C)C	α-cyperone	C15H22O	Corticosteroid binding globulin	P08185	SERPINA6
14	473-08-5	CC1=C2CC(CCC2(CCC1=O)C)C(=C)C	α-cyperone	C15H22O	Testis-specific androgen-binding protein	P04278	SHBG
14	473-08-5	CC1=C2CC(CCC2(CCC1=O)C)C(=C)C	α-cyperone	C15H22O	Pregnane X receptor	O75469	NR1I2
14	473-08-5	CC1=C2CC(CCC2(CCC1=O)C)C(=C)C	α-cyperone	C15H22O	Fatty acid-binding protein, liver	P07148	FABP1
14	473-08-5	CC1=C2CC(CCC2(CCC1=O)C)C(=C)C	α-cyperone	C15H22O	Sigma opioid receptor	Q99720	SIGMAR1
14	473-08-5	CC1=C2CC(CCC2(CCC1=O)C)C(=C)C	α-cyperone	C15H22O	Androgen Receptor	P10275	AR
14	473-08-5	CC1=C2CC(CCC2(CCC1=O)C)C(=C)C	α-cyperone	C15H22O	Progesterone receptor	P06401	PGR
14	473-08-5	CC1=C2CC(CCC2(CCC1=O)C)C(=C)C	α-cyperone	C15H22O	Estradiol 17-beta-dehydrogenase 3	P37058	HSD17B3
14	473-08-5	CC1=C2CC(CCC2(CCC1=O)C)C(=C)C	α-cyperone	C15H22O	Glucocorticoid receptor	P04150	NR3C1
14	473-08-5	CC1=C2CC(CCC2(CCC1=O)C)C(=C)C	α-cyperone	C15H22O	Mineralocorticoid receptor	P08235	NR3C2
14	473-08-5	CC1=C2CC(CCC2(CCC1=O)C)C(=C)C	α-cyperone	C15H22O	11-beta-hydroxysteroid dehydrogenase 1	P28845	HSD11B1
14	473-08-5	CC1=C2CC(CCC2(CCC1=O)C)C(=C)C	α-cyperone	C15H22O	Niemann-Pick C1-like protein 1	Q9UHC9	NPC1L1
14	473-08-5	CC1=C2CC(CCC2(CCC1=O)C)C(=C)C	α-cyperone	C15H22O	Dopamine transporter	Q01959	SLC6A3
14	473-08-5	CC1=C2CC(CCC2(CCC1=O)C)C(=C)C	α-cyperone	C15H22O	C-C chemokine receptor type 5	P51681	CCR5
14	473-08-5	CC1=C2CC(CCC2(CCC1=O)C)C(=C)C	α-cyperone	C15H22O	MAP kinase ERK1	P27361	MAPK3
14	473-08-5	CC1=C2CC(CCC2(CCC1=O)C)C(=C)C	α-cyperone	C15H22O	Protein kinase C eta	P24723	PRKCH
14	473-08-5	CC1=C2CC(CCC2(CCC1=O)C)C(=C)C	α-cyperone	C15H22O	11-beta-hydroxysteroid dehydrogenase 2	P80365	HSD11B2
14	473-08-5	CC1=C2CC(CCC2(CCC1=O)C)C(=C)C	α-cyperone	C15H22O	Protein-tyrosine phosphatase 2C	Q06124	PTPN11
14	473-08-5	CC1=C2CC(CCC2(CCC1=O)C)C(=C)C	α-cyperone	C15H22O	Aldo-keto reductase family 1 member B10	O60218	AKR1B10
14	473-08-5	CC1=C2CC(CCC2(CCC1=O)C)C(=C)C	α-cyperone	C15H22O	Cyclooxygenase-1	P23219	PTGS1
14	473-08-5	CC1=C2CC(CCC2(CCC1=O)C)C(=C)C	α-cyperone	C15H22O	Arachidonate 5-lipoxygenase	P09917	ALOX5
14	473-08-5	CC1=C2CC(CCC2(CCC1=O)C)C(=C)C	α-cyperone	C15H22O	Beta-secretase 1	P56817	BACE1
14	473-08-5	CC1=C2CC(CCC2(CCC1=O)C)C(=C)C	α-cyperone	C15H22O	Cathepsin D	P07339	CTSD
14	473-08-5	CC1=C2CC(CCC2(CCC1=O)C)C(=C)C	α-cyperone	C15H22O	T-cell protein-tyrosine phosphatase	P17706	PTPN2
14	473-08-5	CC1=C2CC(CCC2(CCC1=O)C)C(=C)C	α-cyperone	C15H22O	Nitric oxide synthase, inducible	P35228	NOS2
14	473-08-5	CC1=C2CC(CCC2(CCC1=O)C)C(=C)C	α-cyperone	C15H22O	Prostaglandin E synthase	O14684	PTGES
14	473-08-5	CC1=C2CC(CCC2(CCC1=O)C)C(=C)C	α-cyperone	C15H22O	P2X purinoceptor 7	Q99572	P2RX7
14	473-08-5	CC1=C2CC(CCC2(CCC1=O)C)C(=C)C	α-cyperone	C15H22O	Nuclear receptor ROR-alpha	P35398	RORA
14	473-08-5	CC1=C2CC(CCC2(CCC1=O)C)C(=C)C	α-cyperone	C15H22O	Anandamide amidohydrolase	O00519	FAAH
14	473-08-5	CC1=C2CC(CCC2(CCC1=O)C)C(=C)C	α-cyperone	C15H22O	Poly [ADP-ribose] polymerase-1	P09874	PARP1
14	473-08-5	CC1=C2CC(CCC2(CCC1=O)C)C(=C)C	α-cyperone	C15H22O	Dual specificity phosphatase Cdc25A	P30304	CDC25A
14	473-08-5	CC1=C2CC(CCC2(CCC1=O)C)C(=C)C	α-cyperone	C15H22O	Alcohol dehydrogenase alpha chain	P07327	ADH1A
14	473-08-5	CC1=C2CC(CCC2(CCC1=O)C)C(=C)C	α-cyperone	C15H22O	Voltage-gated N-type calcium channel alpha-1B subunit	Q00975	CACNA1B
14	473-08-5	CC1=C2CC(CCC2(CCC1=O)C)C(=C)C	α-cyperone	C15H22O	Melatonin receptor 1A	P48039	MTNR1A
14	473-08-5	CC1=C2CC(CCC2(CCC1=O)C)C(=C)C	α-cyperone	C15H22O	Melatonin receptor 1B	P49286	MTNR1B
14	473-08-5	CC1=C2CC(CCC2(CCC1=O)C)C(=C)C	α-cyperone	C15H22O	Thymidylate synthase	P04818	TYMS
14	473-08-5	CC1=C2CC(CCC2(CCC1=O)C)C(=C)C	α-cyperone	C15H22O	Adenosine A3 receptor	P0DMS8	ADORA3
14	473-08-5	CC1=C2CC(CCC2(CCC1=O)C)C(=C)C	α-cyperone	C15H22O	Protein-tyrosine phosphatase 1B	P18031	PTPN1
14	473-08-5	CC1=C2CC(CCC2(CCC1=O)C)C(=C)C	α-cyperone	C15H22O	Epoxide hydratase	P34913	EPHX2
14	473-08-5	CC1=C2CC(CCC2(CCC1=O)C)C(=C)C	α-cyperone	C15H22O	Gamma-secretase	P49810	PSEN2
14	473-08-5	CC1=C2CC(CCC2(CCC1=O)C)C(=C)C	α-cyperone	C15H22O	Cytochrome P450 11B1	P15538	CYP11B1
14	473-08-5	CC1=C2CC(CCC2(CCC1=O)C)C(=C)C	α-cyperone	C15H22O	Cytochrome P450 11B2	P19099	CYP11B2
14	473-08-5	CC1=C2CC(CCC2(CCC1=O)C)C(=C)C	α-cyperone	C15H22O	Serotonin transporter	P31645	SLC6A4
14	473-08-5	CC1=C2CC(CCC2(CCC1=O)C)C(=C)C	α-cyperone	C15H22O	Butyrylcholinesterase	P06276	BCHE
14	473-08-5	CC1=C2CC(CCC2(CCC1=O)C)C(=C)C	α-cyperone	C15H22O	Quinone reductase 2	P16083	NQO2
14	473-08-5	CC1=C2CC(CCC2(CCC1=O)C)C(=C)C	α-cyperone	C15H22O	Cathepsin K	P43235	CTSK
14	473-08-5	CC1=C2CC(CCC2(CCC1=O)C)C(=C)C	α-cyperone	C15H22O	Vanilloid receptor	Q8NER1	TRPV1
14	473-08-5	CC1=C2CC(CCC2(CCC1=O)C)C(=C)C	α-cyperone	C15H22O	Transient receptor potential cation channel subfamily A member 1	O75762	TRPA1
14	473-08-5	CC1=C2CC(CCC2(CCC1=O)C)C(=C)C	α-cyperone	C15H22O	Serine/threonine-protein kinase AKT	P31749	AKT1
14	473-08-5	CC1=C2CC(CCC2(CCC1=O)C)C(=C)C	α-cyperone	C15H22O	Monoamine oxidase A	P21397	MAOA
14	473-08-5	CC1=C2CC(CCC2(CCC1=O)C)C(=C)C	α-cyperone	C15H22O	Monoamine oxidase B	P27338	MAOB
14	473-08-5	CC1=C2CC(CCC2(CCC1=O)C)C(=C)C	α-cyperone	C15H22O	Zinc finger protein GLI2	P10070	GLI2
14	473-08-5	CC1=C2CC(CCC2(CCC1=O)C)C(=C)C	α-cyperone	C15H22O	Zinc finger protein GLI1	P08151	GLI1
14	473-08-5	CC1=C2CC(CCC2(CCC1=O)C)C(=C)C	α-cyperone	C15H22O	DNA topoisomerase I	P11387	TOP1
14	473-08-5	CC1=C2CC(CCC2(CCC1=O)C)C(=C)C	α-cyperone	C15H22O	Protein-tyrosine phosphatase 1C	P29350	PTPN6
15	73069-13-3	CC1=C2CC3C(=C)CCCC3(C=C2OC1=O)C	Atractylenolide I	C15H18O2	Gamma-aminobutyric acid receptor subunit alpha-1	P14867	GABRA1
15	73069-13-3	CC1=C2CC3C(=C)CCCC3(C=C2OC1=O)C	Atractylenolide I	C15H18O2	Gamma-aminobutyric-acid receptor alpha-2 subunit	P47869	GABRA2
15	73069-13-3	CC1=C2CC3C(=C)CCCC3(C=C2OC1=O)C	Atractylenolide I	C15H18O2	Interleukin-1 beta	P01584	IL1B
15	73069-13-3	CC1=C2CC3C(=C)CCCC3(C=C2OC1=O)C	Atractylenolide I	C15H18O2	Interleukin-6	P05231	IL6
15	73069-13-3	CC1=C2CC3C(=C)CCCC3(C=C2OC1=O)C	Atractylenolide I	C15H18O2	Neuronal acetylcholine receptor protein, alpha-7 chain	P36544	CHRNA7
15	73069-13-3	CC1=C2CC3C(=C)CCCC3(C=C2OC1=O)C	Atractylenolide I	C15H18O2	Placenta growth factor	P49763	PGF
15	73069-13-3	CC1=C2CC3C(=C)CCCC3(C=C2OC1=O)C	Atractylenolide I	C15H18O2	Tumor necrosis factor	O00220	TNFRSF10A
15	73069-13-3	CC1=C2CC3C(=C)CCCC3(C=C2OC1=O)C	Atractylenolide I	C15H18O2	Vascular endothelial growth factor A	P15692	VEGFA
16	73030-71-4	CC1=C2CC3C(=C)CCCC3(CC2(OC1=O)O)C	Atractylenolide II	C15H20O2	Gamma-aminobutyric acid receptor subunit alpha-1	P14867	GABRA1
16	73030-71-4	CC1=C2CC3C(=C)CCCC3(CC2(OC1=O)O)C	Atractylenolide II	C15H20O2	Gamma-aminobutyric-acid receptor subunit alpha-6	Q16445	GABRA6
16	73030-71-4	CC1=C2CC3C(=C)CCCC3(CC2(OC1=O)O)C	Atractylenolide II	C15H20O2	Glutamate receptor 2	P42262	GRIA2
16	73030-71-4	CC1=C2CC3C(=C)CCCC3(CC2(OC1=O)O)C	Atractylenolide II	C15H20O2	Neuronal acetylcholine receptor protein, alpha-7 chain	P36544	CHRNA7
16	73030-71-4	CC1=C2CC3C(=C)CCCC3(CC2(OC1=O)O)C	Atractylenolide II	C15H20O2	Tumor necrosis factor	O00220	TNFRSF10A
17	73069-14-4	CC1=C2CC3C(=C)CCCC3(CC2OC1=O)C	Atractylenolide Ⅲ	C15H20O3	Brefeldin A-inhibited guanine nucleotide-exchange protein 2	Q9Y6D5	ARFGEF2
17	73069-14-4	CC1=C2CC3C(=C)CCCC3(CC2OC1=O)C	Atractylenolide Ⅲ	C15H20O3	Dedicator of cytokinesis protein 4	Q8N1I0	DOCK4
17	73069-14-4	CC1=C2CC3C(=C)CCCC3(CC2OC1=O)C	Atractylenolide Ⅲ	C15H20O3	Dedicator of cytokinesis protein 5	Q9H7D0	DOCK5
17	73069-14-4	CC1=C2CC3C(=C)CCCC3(CC2OC1=O)C	Atractylenolide Ⅲ	C15H20O3	Dual specificity mitogen-activated protein kinase kinase 1	Q02750	MAP2K1
17	73069-14-4	CC1=C2CC3C(=C)CCCC3(CC2OC1=O)C	Atractylenolide Ⅲ	C15H20O3	Gamma-aminobutyric acid receptor subunit alpha-1	P14867	GABRA1
17	73069-14-4	CC1=C2CC3C(=C)CCCC3(CC2OC1=O)C	Atractylenolide Ⅲ	C15H20O3	Gamma-aminobutyric-acid receptor alpha-2 subunit	P47869	GABRA2
17	73069-14-4	CC1=C2CC3C(=C)CCCC3(CC2OC1=O)C	Atractylenolide Ⅲ	C15H20O3	Gamma-aminobutyric-acid receptor alpha-3 subunit	P34903	GABRA3
17	73069-14-4	CC1=C2CC3C(=C)CCCC3(CC2OC1=O)C	Atractylenolide Ⅲ	C15H20O3	Glutamate receptor 2	P42262	GRIA2
17	73069-14-4	CC1=C2CC3C(=C)CCCC3(CC2OC1=O)C	Atractylenolide Ⅲ	C15H20O3	Guanine nucleotide-binding protein subunit alpha-15	P30679	GNA15
17	73069-14-4	CC1=C2CC3C(=C)CCCC3(CC2OC1=O)C	Atractylenolide Ⅲ	C15H20O3	Muscarinic acetylcholine receptor M1	P11229	CHRM1
17	73069-14-4	CC1=C2CC3C(=C)CCCC3(CC2OC1=O)C	Atractylenolide Ⅲ	C15H20O3	Muscarinic acetylcholine receptor M2	P08172	CHRM2
17	73069-14-4	CC1=C2CC3C(=C)CCCC3(CC2OC1=O)C	Atractylenolide Ⅲ	C15H20O3	Muscarinic acetylcholine receptor M3	P20309	CHRM3
17	73069-14-4	CC1=C2CC3C(=C)CCCC3(CC2OC1=O)C	Atractylenolide Ⅲ	C15H20O3	Muscarinic acetylcholine receptor M4	P08173	CHRM4
17	73069-14-4	CC1=C2CC3C(=C)CCCC3(CC2OC1=O)C	Atractylenolide Ⅲ	C15H20O3	Muscarinic acetylcholine receptor M5	P08912	CHRM5
17	73069-14-4	CC1=C2CC3C(=C)CCCC3(CC2OC1=O)C	Atractylenolide Ⅲ	C15H20O3	Neuronal acetylcholine receptor protein, alpha-7 chain	P36544	CHRNA7
17	73069-14-4	CC1=C2CC3C(=C)CCCC3(CC2OC1=O)C	Atractylenolide Ⅲ	C15H20O3	Neurotensin receptor type 1	P30989	NTSR1
17	73069-14-4	CC1=C2CC3C(=C)CCCC3(CC2OC1=O)C	Atractylenolide Ⅲ	C15H20O3	P2X purinoceptor 1	P51575	P2RX1
17	73069-14-4	CC1=C2CC3C(=C)CCCC3(CC2OC1=O)C	Atractylenolide Ⅲ	C15H20O3	Sodium/potassium-transporting ATPase subunit alpha-1	P05023	ATP1A1
18	6989-21-5	CC1=COC2=C1CC3C(=C)CCCC3(C2)C	Atractylone	C15H20O	5-hydroxytryptamine 2A receptor	P28223	HTR2A
18	6989-21-5	CC1=COC2=C1CC3C(=C)CCCC3(C2)C	Atractylone	C15H20O	Alpha-1A adrenergic receptor	P35348	ADRA1A
18	6989-21-5	CC1=COC2=C1CC3C(=C)CCCC3(C2)C	Atractylone	C15H20O	Alpha-1B adrenergic receptor	P35368	ADRA1B
18	6989-21-5	CC1=COC2=C1CC3C(=C)CCCC3(C2)C	Atractylone	C15H20O	Beta-1 adrenergic receptor	P08588	ADRB1
18	6989-21-5	CC1=COC2=C1CC3C(=C)CCCC3(C2)C	Atractylone	C15H20O	Beta-2 adrenergic receptor	P07550	ADRB2
18	6989-21-5	CC1=COC2=C1CC3C(=C)CCCC3(C2)C	Atractylone	C15H20O	CGMP-inhibited 3',5'-cyclic phosphodiesterase A	Q14432	PDE3A
18	6989-21-5	CC1=COC2=C1CC3C(=C)CCCC3(C2)C	Atractylone	C15H20O	Dopamine D1 receptor	P21728	DRD1
18	6989-21-5	CC1=COC2=C1CC3C(=C)CCCC3(C2)C	Atractylone	C15H20O	Muscarinic acetylcholine receptor M1	P11229	CHRM1
18	6989-21-5	CC1=COC2=C1CC3C(=C)CCCC3(C2)C	Atractylone	C15H20O	Muscarinic acetylcholine receptor M2	P08172	CHRM2
18	6989-21-5	CC1=COC2=C1CC3C(=C)CCCC3(C2)C	Atractylone	C15H20O	Muscarinic acetylcholine receptor M3	P20309	CHRM3
18	6989-21-5	CC1=COC2=C1CC3C(=C)CCCC3(C2)C	Atractylone	C15H20O	Muscarinic acetylcholine receptor M4	P08173	CHRM4
18	6989-21-5	CC1=COC2=C1CC3C(=C)CCCC3(C2)C	Atractylone	C15H20O	Mu-type opioid receptor	P35372	OPRM1
18	6989-21-5	CC1=COC2=C1CC3C(=C)CCCC3(C2)C	Atractylone	C15H20O	Neuronal acetylcholine receptor protein, alpha-7 chain	P36544	CHRNA7
18	6989-21-5	CC1=COC2=C1CC3C(=C)CCCC3(C2)C	Atractylone	C15H20O	Nitric-oxide synthase, endothelial	P29474	NOS3
18	6989-21-5	CC1=COC2=C1CC3C(=C)CCCC3(C2)C	Atractylone	C15H20O	Sodium channel protein type 5 subunit alpha	Q14524	SCN5A
18	6989-21-5	CC1=COC2=C1CC3C(=C)CCCC3(C2)C	Atractylone	C15H20O	Sodium-dependent dopamine transporter	Q01959	SLC6A3
18	6989-21-5	CC1=COC2=C1CC3C(=C)CCCC3(C2)C	Atractylone	C15H20O	Sodium-dependent noradrenaline transporter	P23975	SLC6A2
18	6989-21-5	CC1=COC2=C1CC3C(=C)CCCC3(C2)C	Atractylone	C15H20O	Thrombin	P25116	F2R
19	-	CC1=CC(C)=C2C(OC3=C2C=CC=C3)=C1	1,3-dimethyldibenzo[b,d]furan	C14H12O	Cytochrome P450 2A6	P11509	CYP2A6
19	-	CC1=CC(C)=C2C(OC3=C2C=CC=C3)=C1	1,3-dimethyldibenzo[b,d]furan	C14H12O	Cathepsin K	P43235	CTSK
19	-	CC1=CC(C)=C2C(OC3=C2C=CC=C3)=C1	1,3-dimethyldibenzo[b,d]furan	C14H12O	Cathepsin L	P07711	CTSL
19	-	CC1=CC(C)=C2C(OC3=C2C=CC=C3)=C1	1,3-dimethyldibenzo[b,d]furan	C14H12O	Cathepsin (B and K)	P07858	CTSB
20	17066-67-0	CC(=C)C1CCC2(CCCC(=C)C2C1)C	β-selinene	C15H24	Alpha-1B adrenergic receptor	P35368	ADRA1B
20	17066-67-0	CC(=C)C1CCC2(CCCC(=C)C2C1)C	β-selinene	C15H24	Gamma-aminobutyric acid receptor subunit alpha-1	P14867	GABRA1
20	17066-67-0	CC(=C)C1CCC2(CCCC(=C)C2C1)C	β-selinene	C15H24	Gamma-aminobutyric-acid receptor alpha-2 subunit	P47869	GABRA2
20	17066-67-0	CC(=C)C1CCC2(CCCC(=C)C2C1)C	β-selinene	C15H24	Gamma-aminobutyric-acid receptor alpha-3 subunit	P34903	GABRA3
20	17066-67-0	CC(=C)C1CCC2(CCCC(=C)C2C1)C	β-selinene	C15H24	Gamma-aminobutyric-acid receptor subunit alpha-6	Q16445	GABRA6
20	17066-67-0	CC(=C)C1CCC2(CCCC(=C)C2C1)C	β-selinene	C15H24	Muscarinic acetylcholine receptor M1	P11229	CHRM1
20	17066-67-0	CC(=C)C1CCC2(CCCC(=C)C2C1)C	β-selinene	C15H24	Muscarinic acetylcholine receptor M2	P08172	CHRM2
20	17066-67-0	CC(=C)C1CCC2(CCCC(=C)C2C1)C	β-selinene	C15H24	Muscarinic acetylcholine receptor M3	P20309	CHRM3
20	17066-67-0	CC(=C)C1CCC2(CCCC(=C)C2C1)C	β-selinene	C15H24	Nuclear receptor coactivator 2	Q15596	NCOA2
20	17066-67-0	CC(=C)C1CCC2(CCCC(=C)C2C1)C	β-selinene	C15H24	Prostaglandin G/H synthase 1	P23219	PTGS1
20	17066-67-0	CC(=C)C1CCC2(CCCC(=C)C2C1)C	β-selinene	C15H24	Prostaglandin G/H synthase 2	P35354	PTGS2
20	17066-67-0	CC(=C)C1CCC2(CCCC(=C)C2C1)C	β-selinene	C15H24	Retinoic acid receptor RXR-alpha	P19793	RXRA
20	17066-67-0	CC(=C)C1CCC2(CCCC(=C)C2C1)C	β-selinene	C15H24	Sodium-dependent noradrenaline transporter	P23975	SLC6A2
21	6750-60-3	CC1(C2C1C3C(CCC3(C)O)C(=C)CC2)C	Espatulenol	C15H24O	UDP-glucuronosyltransferase 2B7	P16662	UGT2B7
21	6750-60-3	CC1(C2C1C3C(CCC3(C)O)C(=C)CC2)C	Espatulenol	C15H24O	11-beta-hydroxysteroid dehydrogenase 1	P28845	HSD11B1
21	6750-60-3	CC1(C2C1C3C(CCC3(C)O)C(=C)CC2)C	Espatulenol	C15H24O	Indoleamine 2,3-dioxygenase	P14902	IDO1
21	6750-60-3	CC1(C2C1C3C(CCC3(C)O)C(=C)CC2)C	Espatulenol	C15H24O	Cyclooxygenase-1	P23219	PTGS1
21	6750-60-3	CC1(C2C1C3C(CCC3(C)O)C(=C)CC2)C	Espatulenol	C15H24O	LXR-alpha	Q13133	NR1H3
21	6750-60-3	CC1(C2C1C3C(CCC3(C)O)C(=C)CC2)C	Espatulenol	C15H24O	Dopamine transporter	Q01959	SLC6A3
21	6750-60-3	CC1(C2C1C3C(CCC3(C)O)C(=C)CC2)C	Espatulenol	C15H24O	Progesterone receptor	P06401	PGR
22	327-97-9	C1C(C(C(CC1(C(=O)O)O)OC(=O)C=CC2=CC(=C(C=C2)O)O)O)O	Chlorogenic acid	C16H18O9	Prostaglandin G/H synthase 2	P35354	PTGS2
23	147396-00-7	CC1=C2CC3C(=C)C(CCC3(CC2(OC1=O)O)C)OC(=O)C	Atractylenolide Ⅳ	C17H24O3	Ribosomal protein S6 kinase alpha 5	O75582	RPS6KA5
23	147396-00-7	CC1=C2CC3C(=C)C(CCC3(CC2(OC1=O)O)C)OC(=O)C	Atractylenolide Ⅳ	C17H24O3	Phospholipase A2 group 1B	P04054	PLA2G1B
23	147396-00-7	CC1=C2CC3C(=C)C(CCC3(CC2(OC1=O)O)C)OC(=O)C	Atractylenolide Ⅳ	C17H24O3	Cytochrome P450 19A1	P11511	CYP19A1
23	147396-00-7	CC1=C2CC3C(=C)C(CCC3(CC2(OC1=O)O)C)OC(=O)C	Atractylenolide Ⅳ	C17H24O3	Potassium-transporting ATPase alpha chain 2	P54707	ATP12A
23	147396-00-7	CC1=C2CC3C(=C)C(CCC3(CC2(OC1=O)O)C)OC(=O)C	Atractylenolide Ⅳ	C17H24O3	Androgen Receptor	P10275	AR
23	147396-00-7	CC1=C2CC3C(=C)C(CCC3(CC2(OC1=O)O)C)OC(=O)C	Atractylenolide Ⅳ	C17H24O3	Progesterone receptor	P06401	PGR
23	147396-00-7	CC1=C2CC3C(=C)C(CCC3(CC2(OC1=O)O)C)OC(=O)C	Atractylenolide Ⅳ	C17H24O3	Dual specificity phosphatase Cdc25B	P30305	CDC25B
23	147396-00-7	CC1=C2CC3C(=C)C(CCC3(CC2(OC1=O)O)C)OC(=O)C	Atractylenolide Ⅳ	C17H24O3	Voltage-gated potassium channel subunit Kv1.5	P22460	KCNA5
23	147396-00-7	CC1=C2CC3C(=C)C(CCC3(CC2(OC1=O)O)C)OC(=O)C	Atractylenolide Ⅳ	C17H24O3	Dual specificity phosphatase Cdc25A	P30304	CDC25A
23	147396-00-7	CC1=C2CC3C(=C)C(CCC3(CC2(OC1=O)O)C)OC(=O)C	Atractylenolide Ⅳ	C17H24O3	Poly [ADP-ribose] polymerase-1	P09874	PARP1
23	147396-00-7	CC1=C2CC3C(=C)C(CCC3(CC2(OC1=O)O)C)OC(=O)C	Atractylenolide Ⅳ	C17H24O3	Kinesin-like protein 1	P52732	KIF11
23	147396-00-7	CC1=C2CC3C(=C)C(CCC3(CC2(OC1=O)O)C)OC(=O)C	Atractylenolide Ⅳ	C17H24O3	Serine/threonine-protein kinase PIM1	P11309	PIM1
23	147396-00-7	CC1=C2CC3C(=C)C(CCC3(CC2(OC1=O)O)C)OC(=O)C	Atractylenolide Ⅳ	C17H24O3	p53-binding protein Mdm-2	Q00987	MDM2
23	147396-00-7	CC1=C2CC3C(=C)C(CCC3(CC2(OC1=O)O)C)OC(=O)C	Atractylenolide Ⅳ	C17H24O3	Serine/threonine-protein kinase PIM3	Q86V86	PIM3
23	147396-00-7	CC1=C2CC3C(=C)C(CCC3(CC2(OC1=O)O)C)OC(=O)C	Atractylenolide Ⅳ	C17H24O3	Phospholipase A2 group IIA	P14555	PLA2G2A
23	147396-00-7	CC1=C2CC3C(=C)C(CCC3(CC2(OC1=O)O)C)OC(=O)C	Atractylenolide Ⅳ	C17H24O3	c-Jun N-terminal kinase 1	P45983	MAPK8
23	147396-00-7	CC1=C2CC3C(=C)C(CCC3(CC2(OC1=O)O)C)OC(=O)C	Atractylenolide Ⅳ	C17H24O3	Adrenergic receptor alpha-2	P18825	ADRA2C
23	147396-00-7	CC1=C2CC3C(=C)C(CCC3(CC2(OC1=O)O)C)OC(=O)C	Atractylenolide Ⅳ	C17H24O3	Cathepsin K	P43235	CTSK
23	147396-00-7	CC1=C2CC3C(=C)C(CCC3(CC2(OC1=O)O)C)OC(=O)C	Atractylenolide Ⅳ	C17H24O3	Cathepsin S	P25774	CTSS
23	147396-00-7	CC1=C2CC3C(=C)C(CCC3(CC2(OC1=O)O)C)OC(=O)C	Atractylenolide Ⅳ	C17H24O3	Tyrosine-protein kinase JAK1	P23458	JAK1
23	147396-00-7	CC1=C2CC3C(=C)C(CCC3(CC2(OC1=O)O)C)OC(=O)C	Atractylenolide Ⅳ	C17H24O3	Tyrosine-protein kinase JAK2	O60674	JAK2
23	147396-00-7	CC1=C2CC3C(=C)C(CCC3(CC2(OC1=O)O)C)OC(=O)C	Atractylenolide Ⅳ	C17H24O3	Tankyrase-2	Q9H2K2	TNKS2
23	147396-00-7	CC1=C2CC3C(=C)C(CCC3(CC2(OC1=O)O)C)OC(=O)C	Atractylenolide Ⅳ	C17H24O3	Dihydroorotate dehydrogenase	Q02127	DHODH
23	147396-00-7	CC1=C2CC3C(=C)C(CCC3(CC2(OC1=O)O)C)OC(=O)C	Atractylenolide Ⅳ	C17H24O3	Interleukin-8 receptor B	P25025	CXCR2
23	147396-00-7	CC1=C2CC3C(=C)C(CCC3(CC2(OC1=O)O)C)OC(=O)C	Atractylenolide Ⅳ	C17H24O3	Taste receptor type 2 member 31	P59538	TAS2R31
23	147396-00-7	CC1=C2CC3C(=C)C(CCC3(CC2(OC1=O)O)C)OC(=O)C	Atractylenolide Ⅳ	C17H24O3	Muscarinic acetylcholine receptor M4	P08173	CHRM4
23	147396-00-7	CC1=C2CC3C(=C)C(CCC3(CC2(OC1=O)O)C)OC(=O)C	Atractylenolide Ⅳ	C17H24O3	Muscarinic acetylcholine receptor M5	P08912	CHRM5
23	147396-00-7	CC1=C2CC3C(=C)C(CCC3(CC2(OC1=O)O)C)OC(=O)C	Atractylenolide Ⅳ	C17H24O3	Cyclin-dependent kinase 2/cyclin E	O96020	CCNE2
23	147396-00-7	CC1=C2CC3C(=C)C(CCC3(CC2(OC1=O)O)C)OC(=O)C	Atractylenolide Ⅳ	C17H24O3	Muscarinic acetylcholine receptor M2	P08172	CHRM2
23	147396-00-7	CC1=C2CC3C(=C)C(CCC3(CC2(OC1=O)O)C)OC(=O)C	Atractylenolide Ⅳ	C17H24O3	Muscarinic acetylcholine receptor M3	P20309	CHRM3
23	147396-00-7	CC1=C2CC3C(=C)C(CCC3(CC2(OC1=O)O)C)OC(=O)C	Atractylenolide Ⅳ	C17H24O3	Sigma opioid receptor	Q99720	SIGMAR1
23	147396-00-7	CC1=C2CC3C(=C)C(CCC3(CC2(OC1=O)O)C)OC(=O)C	Atractylenolide Ⅳ	C17H24O3	Prostatic acid phosphatase	P15309	ACPP
23	147396-00-7	CC1=C2CC3C(=C)C(CCC3(CC2(OC1=O)O)C)OC(=O)C	Atractylenolide Ⅳ	C17H24O3	c-Jun N-terminal kinase 3	P53779	MAPK10
23	147396-00-7	CC1=C2CC3C(=C)C(CCC3(CC2(OC1=O)O)C)OC(=O)C	Atractylenolide Ⅳ	C17H24O3	Heme oxygenase 1	P09601	HMOX1
23	147396-00-7	CC1=C2CC3C(=C)C(CCC3(CC2(OC1=O)O)C)OC(=O)C	Atractylenolide Ⅳ	C17H24O3	Cytochrome P450 11B1	P15538	CYP11B1
23	147396-00-7	CC1=C2CC3C(=C)C(CCC3(CC2(OC1=O)O)C)OC(=O)C	Atractylenolide Ⅳ	C17H24O3	Cytochrome P450 11B2	P19099	CYP11B2
23	147396-00-7	CC1=C2CC3C(=C)C(CCC3(CC2(OC1=O)O)C)OC(=O)C	Atractylenolide Ⅳ	C17H24O3	MAP kinase signal-integrating kinase 2	Q9HBH9	MKNK2
23	147396-00-7	CC1=C2CC3C(=C)C(CCC3(CC2(OC1=O)O)C)OC(=O)C	Atractylenolide Ⅳ	C17H24O3	Bromodomain-containing protein 4	O60885	BRD4
23	147396-00-7	CC1=C2CC3C(=C)C(CCC3(CC2(OC1=O)O)C)OC(=O)C	Atractylenolide Ⅳ	C17H24O3	Norepinephrine transporter	P23975	SLC6A2
23	147396-00-7	CC1=C2CC3C(=C)C(CCC3(CC2(OC1=O)O)C)OC(=O)C	Atractylenolide Ⅳ	C17H24O3	Serotonin transporter	P31645	SLC6A4
23	147396-00-7	CC1=C2CC3C(=C)C(CCC3(CC2(OC1=O)O)C)OC(=O)C	Atractylenolide Ⅳ	C17H24O3	Dopamine transporter	Q01959	SLC6A3
23	147396-00-7	CC1=C2CC3C(=C)C(CCC3(CC2(OC1=O)O)C)OC(=O)C	Atractylenolide Ⅳ	C17H24O3	Mitogen-activated protein kinase kinase kinase 14	Q99558	MAP3K14
23	147396-00-7	CC1=C2CC3C(=C)C(CCC3(CC2(OC1=O)O)C)OC(=O)C	Atractylenolide Ⅳ	C17H24O3	ADAM17	P78536	ADAM17
23	147396-00-7	CC1=C2CC3C(=C)C(CCC3(CC2(OC1=O)O)C)OC(=O)C	Atractylenolide Ⅳ	C17H24O3	Quinone reductase 2	P16083	NQO2
23	147396-00-7	CC1=C2CC3C(=C)C(CCC3(CC2(OC1=O)O)C)OC(=O)C	Atractylenolide Ⅳ	C17H24O3	Sodium channel protein type IX alpha subunit	Q15858	SCN9A
23	147396-00-7	CC1=C2CC3C(=C)C(CCC3(CC2(OC1=O)O)C)OC(=O)C	Atractylenolide Ⅳ	C17H24O3	Cyclin-dependent kinase 2/cyclin A	P24941	CDK2
23	147396-00-7	CC1=C2CC3C(=C)C(CCC3(CC2(OC1=O)O)C)OC(=O)C	Atractylenolide Ⅳ	C17H24O3	Matrix metalloproteinase 3	P08254	MMP3
23	147396-00-7	CC1=C2CC3C(=C)C(CCC3(CC2(OC1=O)O)C)OC(=O)C	Atractylenolide Ⅳ	C17H24O3	Inosine-5'-monophosphate dehydrogenase 2	P12268	IMPDH2
23	147396-00-7	CC1=C2CC3C(=C)C(CCC3(CC2(OC1=O)O)C)OC(=O)C	Atractylenolide Ⅳ	C17H24O3	Focal adhesion kinase 1	Q05397	PTK2
23	147396-00-7	CC1=C2CC3C(=C)C(CCC3(CC2(OC1=O)O)C)OC(=O)C	Atractylenolide Ⅳ	C17H24O3	Vascular endothelial growth factor receptor 2	P35968	KDR
24	60-18-4	C1=CC(=CC=C1CC(C(=O)O)N)O	D-tyrosine	C9H11NO3	Acetylcholinesterase	P22303	ACHE
24	60-18-4	C1=CC(=CC=C1CC(C(=O)O)N)O	D-tyrosine	C9H11NO3	Alpha-1A adrenergic receptor	P35348	ADRA1A
24	60-18-4	C1=CC(=CC=C1CC(C(=O)O)N)O	D-tyrosine	C9H11NO3	Alpha-1B adrenergic receptor	P35368	ADRA1B
24	60-18-4	C1=CC(=CC=C1CC(C(=O)O)N)O	D-tyrosine	C9H11NO3	Alpha-2A adrenergic receptor	P08913	ADRA2A
24	60-18-4	C1=CC(=CC=C1CC(C(=O)O)N)O	D-tyrosine	C9H11NO3	Alpha-2B adrenergic receptor	P18089	ADRA2B
24	60-18-4	C1=CC(=CC=C1CC(C(=O)O)N)O	D-tyrosine	C9H11NO3	Alpha-2C adrenergic receptor	P18825	ADRA2C
24	60-18-4	C1=CC(=CC=C1CC(C(=O)O)N)O	D-tyrosine	C9H11NO3	Amine oxidase [flavin-containing] A	P21397	MAOA
24	60-18-4	C1=CC(=CC=C1CC(C(=O)O)N)O	D-tyrosine	C9H11NO3	Amine oxidase [flavin-containing] B	P27338	MAOB
24	60-18-4	C1=CC(=CC=C1CC(C(=O)O)N)O	D-tyrosine	C9H11NO3	Beta-1 adrenergic receptor	P08588	ADRB1
24	60-18-4	C1=CC(=CC=C1CC(C(=O)O)N)O	D-tyrosine	C9H11NO3	Beta-2 adrenergic receptor	P07550	ADRB2
24	60-18-4	C1=CC(=CC=C1CC(C(=O)O)N)O	D-tyrosine	C9H11NO3	Beta-lactamase	Q96BR5	COA7
24	60-18-4	C1=CC(=CC=C1CC(C(=O)O)N)O	D-tyrosine	C9H11NO3	Chymotrypsinogen B	P17538	CTRB1
24	60-18-4	C1=CC(=CC=C1CC(C(=O)O)N)O	D-tyrosine	C9H11NO3	Dipeptidyl peptidase IV	P27487	DPP4
24	60-18-4	C1=CC(=CC=C1CC(C(=O)O)N)O	D-tyrosine	C9H11NO3	Dopamine D1 receptor	P21728	DRD1
24	60-18-4	C1=CC(=CC=C1CC(C(=O)O)N)O	D-tyrosine	C9H11NO3	mRNA of Protein-tyrosine phosphatase, non-receptor type 1	Q99952	PTPN18
24	60-18-4	C1=CC(=CC=C1CC(C(=O)O)N)O	D-tyrosine	C9H11NO3	Muscarinic acetylcholine receptor M1	P11229	CHRM1
24	60-18-4	C1=CC(=CC=C1CC(C(=O)O)N)O	D-tyrosine	C9H11NO3	Nitric-oxide synthase, endothelial	P29474	NOS3
24	60-18-4	C1=CC(=CC=C1CC(C(=O)O)N)O	D-tyrosine	C9H11NO3	Prostaglandin G/H synthase 1	P23219	PTGS1
24	60-18-4	C1=CC(=CC=C1CC(C(=O)O)N)O	D-tyrosine	C9H11NO3	Prostaglandin G/H synthase 2	P35354	PTGS2
24	60-18-4	C1=CC(=CC=C1CC(C(=O)O)N)O	D-tyrosine	C9H11NO3	Sodium-dependent dopamine transporter	Q01959	SLC6A3
24	60-18-4	C1=CC(=CC=C1CC(C(=O)O)N)O	D-tyrosine	C9H11NO3	Thrombin	P25116	F2R
25	193694-24-5	CC1=C2CC3C(=C)CCCC3(CC2(OC1=O)OC)C	8β-methoxy atracolactone I	C16H22O3	Phospholipase A2 group 1B	P04054	PLA2G1B
25	193694-24-5	CC1=C2CC3C(=C)CCCC3(CC2(OC1=O)OC)C	8β-methoxy atracolactone I	C16H22O3	Ribosomal protein S6 kinase alpha 5	O75582	RPS6KA5
25	193694-24-5	CC1=C2CC3C(=C)CCCC3(CC2(OC1=O)OC)C	8β-methoxy atracolactone I	C16H22O3	Potassium-transporting ATPase alpha chain 2	P54707	ATP12A
25	193694-24-5	CC1=C2CC3C(=C)CCCC3(CC2(OC1=O)OC)C	8β-methoxy atracolactone I	C16H22O3	Dual specificity phosphatase Cdc25A	P30304	CDC25A
25	193694-24-5	CC1=C2CC3C(=C)CCCC3(CC2(OC1=O)OC)C	8β-methoxy atracolactone I	C16H22O3	Dual specificity phosphatase Cdc25B	P30305	CDC25B
25	193694-24-5	CC1=C2CC3C(=C)CCCC3(CC2(OC1=O)OC)C	8β-methoxy atracolactone I	C16H22O3	Tubulin--tyrosine ligase	Q8NG68	TTL
25	193694-24-5	CC1=C2CC3C(=C)CCCC3(CC2(OC1=O)OC)C	8β-methoxy atracolactone I	C16H22O3	Cytochrome P450 19A1	P11511	CYP19A1
25	193694-24-5	CC1=C2CC3C(=C)CCCC3(CC2(OC1=O)OC)C	8β-methoxy atracolactone I	C16H22O3	HERG	Q12809	KCNH2
25	193694-24-5	CC1=C2CC3C(=C)CCCC3(CC2(OC1=O)OC)C	8β-methoxy atracolactone I	C16H22O3	Glycine receptor subunit alpha-2	P23416	GLRA2
25	193694-24-5	CC1=C2CC3C(=C)CCCC3(CC2(OC1=O)OC)C	8β-methoxy atracolactone I	C16H22O3	P2X purinoceptor 7	Q99572	P2RX7
25	193694-24-5	CC1=C2CC3C(=C)CCCC3(CC2(OC1=O)OC)C	8β-methoxy atracolactone I	C16H22O3	Dopamine transporter	Q01959	SLC6A3
25	193694-24-5	CC1=C2CC3C(=C)CCCC3(CC2(OC1=O)OC)C	8β-methoxy atracolactone I	C16H22O3	MAP kinase p38 alpha	Q16539	MAPK14
25	193694-24-5	CC1=C2CC3C(=C)CCCC3(CC2(OC1=O)OC)C	8β-methoxy atracolactone I	C16H22O3	Phospholipase A2 group IIA	P14555	PLA2G2A
25	193694-24-5	CC1=C2CC3C(=C)CCCC3(CC2(OC1=O)OC)C	8β-methoxy atracolactone I	C16H22O3	Phosphodiesterase 4B	Q07343	PDE4B
25	193694-24-5	CC1=C2CC3C(=C)CCCC3(CC2(OC1=O)OC)C	8β-methoxy atracolactone I	C16H22O3	MAP kinase ERK2	P28482	MAPK1
25	193694-24-5	CC1=C2CC3C(=C)CCCC3(CC2(OC1=O)OC)C	8β-methoxy atracolactone I	C16H22O3	Phosphodiesterase 3	Q14432	PDE3A
25	193694-24-5	CC1=C2CC3C(=C)CCCC3(CC2(OC1=O)OC)C	8β-methoxy atracolactone I	C16H22O3	Potassium channel subfamily K member 3	O14649	KCNK3
25	193694-24-5	CC1=C2CC3C(=C)CCCC3(CC2(OC1=O)OC)C	8β-methoxy atracolactone I	C16H22O3	Potassium channel subfamily K member 9	Q9NPC2	KCNK9
25	193694-24-5	CC1=C2CC3C(=C)CCCC3(CC2(OC1=O)OC)C	8β-methoxy atracolactone I	C16H22O3	CDK8/Cyclin C	P24863	CCNC
25	193694-24-5	CC1=C2CC3C(=C)CCCC3(CC2(OC1=O)OC)C	8β-methoxy atracolactone I	C16H22O3	Receptor-interacting serine/threonine-protein kinase 3	Q9Y572	RIPK3
25	193694-24-5	CC1=C2CC3C(=C)CCCC3(CC2(OC1=O)OC)C	8β-methoxy atracolactone I	C16H22O3	Quinone reductase 2	P16083	NQO2
25	193694-24-5	CC1=C2CC3C(=C)CCCC3(CC2(OC1=O)OC)C	8β-methoxy atracolactone I	C16H22O3	Serine/threonine-protein kinase RIPK2	O43353	RIPK2
25	193694-24-5	CC1=C2CC3C(=C)CCCC3(CC2(OC1=O)OC)C	8β-methoxy atracolactone I	C16H22O3	Androgen Receptor	P10275	AR
25	193694-24-5	CC1=C2CC3C(=C)CCCC3(CC2(OC1=O)OC)C	8β-methoxy atracolactone I	C16H22O3	Progesterone receptor	P06401	PGR
25	193694-24-5	CC1=C2CC3C(=C)CCCC3(CC2(OC1=O)OC)C	8β-methoxy atracolactone I	C16H22O3	TGF-beta receptor type I	P36897	TGFBR1
25	193694-24-5	CC1=C2CC3C(=C)CCCC3(CC2(OC1=O)OC)C	8β-methoxy atracolactone I	C16H22O3	Melatonin receptor 1A	P48039	MTNR1A
25	193694-24-5	CC1=C2CC3C(=C)CCCC3(CC2(OC1=O)OC)C	8β-methoxy atracolactone I	C16H22O3	Melatonin receptor 1B	P49286	MTNR1B
25	193694-24-5	CC1=C2CC3C(=C)CCCC3(CC2(OC1=O)OC)C	8β-methoxy atracolactone I	C16H22O3	Voltage-gated N-type calcium channel alpha-1B subunit	Q00975	CACNA1B
25	193694-24-5	CC1=C2CC3C(=C)CCCC3(CC2(OC1=O)OC)C	8β-methoxy atracolactone I	C16H22O3	Serotonin transporter	P31645	SLC6A4
25	193694-24-5	CC1=C2CC3C(=C)CCCC3(CC2(OC1=O)OC)C	8β-methoxy atracolactone I	C16H22O3	Heme oxygenase 1	P09601	HMOX1
26	541-91-3	CC1CCCCCCCCCCCCC(=O)C1	Muscone	C16H30O	Cytochrome P450 19A1	P11511	CYP19A1
26	541-91-3	CC1CCCCCCCCCCCCC(=O)C1	Muscone	C16H30O	Carbonic anhydrase II	P00918	CA2
26	541-91-3	CC1CCCCCCCCCCCCC(=O)C1	Muscone	C16H30O	Nuclear receptor subfamily 1 group I member 3	Q14994	NR1I3
26	541-91-3	CC1CCCCCCCCCCCCC(=O)C1	Muscone	C16H30O	Acyl coenzyme A:cholesterol acyltransferase	P23141	CES1
26	541-91-3	CC1CCCCCCCCCCCCC(=O)C1	Muscone	C16H30O	Carboxylesterase 2	O00748	CES2
26	541-91-3	CC1CCCCCCCCCCCCC(=O)C1	Muscone	C16H30O	Carbonic anhydrase I	P00915	CA1
26	541-91-3	CC1CCCCCCCCCCCCC(=O)C1	Muscone	C16H30O	Carbonic anhydrase IV	P22748	CA4
26	541-91-3	CC1CCCCCCCCCCCCC(=O)C1	Muscone	C16H30O	Androgen Receptor	P10275	AR
26	541-91-3	CC1CCCCCCCCCCCCC(=O)C1	Muscone	C16H30O	P2X purinoceptor 7	Q99572	P2RX7
26	541-91-3	CC1CCCCCCCCCCCCC(=O)C1	Muscone	C16H30O	Epoxide hydratase	P34913	EPHX2
26	541-91-3	CC1CCCCCCCCCCCCC(=O)C1	Muscone	C16H30O	Epoxide hydrolase 1	P07099	EPHX1
26	541-91-3	CC1CCCCCCCCCCCCC(=O)C1	Muscone	C16H30O	Prostaglandin E synthase	O14684	PTGES
26	541-91-3	CC1CCCCCCCCCCCCC(=O)C1	Muscone	C16H30O	11-beta-hydroxysteroid dehydrogenase 1	P28845	HSD11B1
26	541-91-3	CC1CCCCCCCCCCCCC(=O)C1	Muscone	C16H30O	Melatonin receptor 1A	P48039	MTNR1A
26	541-91-3	CC1CCCCCCCCCCCCC(=O)C1	Muscone	C16H30O	Melatonin receptor 1B	P49286	MTNR1B
26	541-91-3	CC1CCCCCCCCCCCCC(=O)C1	Muscone	C16H30O	Poly [ADP-ribose] polymerase-1	P09874	PARP1
26	541-91-3	CC1CCCCCCCCCCCCC(=O)C1	Muscone	C16H30O	Bromodomain-containing protein 4	O60885	BRD4
26	541-91-3	CC1CCCCCCCCCCCCC(=O)C1	Muscone	C16H30O	Arachidonate 5-lipoxygenase	P09917	ALOX5
26	541-91-3	CC1CCCCCCCCCCCCC(=O)C1	Muscone	C16H30O	Cyclooxygenase-1	P23219	PTGS1
26	541-91-3	CC1CCCCCCCCCCCCC(=O)C1	Muscone	C16H30O	Cyclooxygenase-2	P35354	PTGS2
26	541-91-3	CC1CCCCCCCCCCCCC(=O)C1	Muscone	C16H30O	Metabotropic glutamate receptor 5	P41594	GRM5
26	541-91-3	CC1CCCCCCCCCCCCC(=O)C1	Muscone	C16H30O	Cathepsin K	P43235	CTSK
26	541-91-3	CC1CCCCCCCCCCCCC(=O)C1	Muscone	C16H30O	Translocator protein	P30536	TSPO
26	541-91-3	CC1CCCCCCCCCCCCC(=O)C1	Muscone	C16H30O	Quinone reductase 2	P16083	NQO2
26	541-91-3	CC1CCCCCCCCCCCCC(=O)C1	Muscone	C16H30O	Sphingosine 1-phosphate receptor Edg-3	Q99500	S1PR3
26	541-91-3	CC1CCCCCCCCCCCCC(=O)C1	Muscone	C16H30O	Steroid 5-alpha-reductase 1	P18405	SRD5A1
26	541-91-3	CC1CCCCCCCCCCCCC(=O)C1	Muscone	C16H30O	Voltage-gated potassium channel subunit Kv1.5	P22460	KCNA5
26	541-91-3	CC1CCCCCCCCCCCCC(=O)C1	Muscone	C16H30O	Dopamine transporter	Q01959	SLC6A3
26	541-91-3	CC1CCCCCCCCCCCCC(=O)C1	Muscone	C16H30O	Metabotropic glutamate receptor 1	Q13255	GRM1
26	541-91-3	CC1CCCCCCCCCCCCC(=O)C1	Muscone	C16H30O	Cannabinoid receptor 2	P34972	CNR2
26	541-91-3	CC1CCCCCCCCCCCCC(=O)C1	Muscone	C16H30O	Cannabinoid receptor 1	P21554	CNR1
26	541-91-3	CC1CCCCCCCCCCCCC(=O)C1	Muscone	C16H30O	Polyamine oxidase	Q6QHF9	PAOX
26	541-91-3	CC1CCCCCCCCCCCCC(=O)C1	Muscone	C16H30O	Estradiol 17-beta-dehydrogenase 2	P37059	HSD17B2
26	541-91-3	CC1CCCCCCCCCCCCC(=O)C1	Muscone	C16H30O	Voltage-gated N-type calcium channel alpha-1B subunit	Q00975	CACNA1B
26	541-91-3	CC1CCCCCCCCCCCCC(=O)C1	Muscone	C16H30O	Cytochrome P450 17A1	P05093	CYP17A1
26	541-91-3	CC1CCCCCCCCCCCCC(=O)C1	Muscone	C16H30O	Indoleamine 2,3-dioxygenase	P14902	IDO1
26	541-91-3	CC1CCCCCCCCCCCCC(=O)C1	Muscone	C16H30O	Prolyl endopeptidase	P48147	PREP
26	541-91-3	CC1CCCCCCCCCCCCC(=O)C1	Muscone	C16H30O	Sphingosine kinase 2	Q9NRA0	SPHK2
27	55078-26-7	CC1=CCC(CC1)C(=C)C	Diacetyl-atractylodiol	C17H20O4	Neuropeptide Y receptor type 5	Q15761	NPY5R
27	55078-26-7	CC1=CCC(CC1)C(=C)C	Diacetyl-atractylodiol	C17H20O4	Vasopressin V2 receptor	P30518	AVPR2
27	55078-26-7	CC1=CCC(CC1)C(=C)C	Diacetyl-atractylodiol	C17H20O4	Vasopressin V1a receptor	P37288	AVPR1A
27	55078-26-7	CC1=CCC(CC1)C(=C)C	Diacetyl-atractylodiol	C17H20O4	Acetyl-CoA carboxylase 2	O00763	ACACB
28	71-00-1	C1=C(NC=N1)CC(C(=O)[O-])[NH3+]	L-histidine	C6H9N3O2	Prostaglandin G/H synthase 1	P23219	PTGS1
28	71-00-1	C1=C(NC=N1)CC(C(=O)[O-])[NH3+]	L-histidine	C6H9N3O2	Prostaglandin G/H synthase 2	P35354	PTGS2
29	74-79-3	C(CC(C(=O)[O-])N)C[NH+]=C(N)N	L-arginine	C6H14N4O2	Nitric-oxide synthase, brain	P29475	NOS1
29	74-79-3	C(CC(C(=O)[O-])N)C[NH+]=C(N)N	L-arginine	C6H14N4O2	Prostaglandin G/H synthase 2	P35354	PTGS2
30	443-79-8	CCC(C)C(C(=O)[O-])[NH3+]	DL-Isoleucine	C6H13NO2	4-aminobutyrate aminotransferase, mitochondrial	P80404	ABAT
30	443-79-8	CCC(C)C(C(=O)[O-])[NH3+]	DL-Isoleucine	C6H13NO2	Alcohol dehydrogenase 1C	P00326	ADH1C
30	443-79-8	CCC(C)C(C(=O)[O-])[NH3+]	DL-Isoleucine	C6H13NO2	Branched-chain-amino-acid aminotransferase, cytosolic	P54687	BCAT1
30	443-79-8	CCC(C)C(C(=O)[O-])[NH3+]	DL-Isoleucine	C6H13NO2	Cathepsin D	P07339	CTSD
30	443-79-8	CCC(C)C(C(=O)[O-])[NH3+]	DL-Isoleucine	C6H13NO2	Cholinesterase	P06276	BCHE
30	443-79-8	CCC(C)C(C(=O)[O-])[NH3+]	DL-Isoleucine	C6H13NO2	Gamma-aminobutyric acid receptor subunit alpha-1	P14867	GABRA1
30	443-79-8	CCC(C)C(C(=O)[O-])[NH3+]	DL-Isoleucine	C6H13NO2	Gamma-aminobutyric-acid receptor subunit alpha-6	Q16445	GABRA6
30	443-79-8	CCC(C)C(C(=O)[O-])[NH3+]	DL-Isoleucine	C6H13NO2	Glycine amidinotransferase, mitochondrial	P50440	GATM
30	443-79-8	CCC(C)C(C(=O)[O-])[NH3+]	DL-Isoleucine	C6H13NO2	Nitric-oxide synthase, brain	P29475	NOS1
30	443-79-8	CCC(C)C(C(=O)[O-])[NH3+]	DL-Isoleucine	C6H13NO2	Renin, renal	P00797	REN
31	56-87-1	C(CCN)CC(C(=O)O)N	L-lysine	C6H14N2O2	Cationic amino acid transporter 4	O43246	SLC7A4
31	56-87-1	C(CCN)CC(C(=O)O)N	L-lysine	C6H14N2O2	High-affinity cationic amino acid transporter-1	P30825	SLC7A1
32	72-18-4	CC(C)C(C(=O)[O-])[NH3+]	L-valine	C5H11NO2	2-isopropylmalate synthase	O75600	GCAT
32	72-18-4	CC(C)C(C(=O)[O-])[NH3+]	L-valine	C5H11NO2	4-aminobutyrate aminotransferase, mitochondrial	P80404	ABAT
32	72-18-4	CC(C)C(C(=O)[O-])[NH3+]	L-valine	C5H11NO2	Alcohol dehydrogenase 1C	P00326	ADH1C
32	72-18-4	CC(C)C(C(=O)[O-])[NH3+]	L-valine	C5H11NO2	Aldose reductase	P15121	AKR1B1
32	72-18-4	CC(C)C(C(=O)[O-])[NH3+]	L-valine	C5H11NO2	Amine oxidase [flavin-containing] B	P27338	MAOB
32	72-18-4	CC(C)C(C(=O)[O-])[NH3+]	L-valine	C5H11NO2	Aspartate aminotransferase	P17174	GOT1
32	72-18-4	CC(C)C(C(=O)[O-])[NH3+]	L-valine	C5H11NO2	Aspartate aminotransferase, cytoplasmic	P17174	GOT1
32	72-18-4	CC(C)C(C(=O)[O-])[NH3+]	L-valine	C5H11NO2	Cathepsin D	P07339	CTSD
32	72-18-4	CC(C)C(C(=O)[O-])[NH3+]	L-valine	C5H11NO2	Cholinesterase	P06276	BCHE
32	72-18-4	CC(C)C(C(=O)[O-])[NH3+]	L-valine	C5H11NO2	Cystathionine gamma-lyase	P32929	CTH
32	72-18-4	CC(C)C(C(=O)[O-])[NH3+]	L-valine	C5H11NO2	Gamma-aminobutyric acid receptor subunit alpha-1	P14867	GABRA1
32	72-18-4	CC(C)C(C(=O)[O-])[NH3+]	L-valine	C5H11NO2	Glycine amidinotransferase, mitochondrial	P50440	GATM
32	72-18-4	CC(C)C(C(=O)[O-])[NH3+]	L-valine	C5H11NO2	Glycine receptor alpha-1 chain	P23415	GLRA1
32	72-18-4	CC(C)C(C(=O)[O-])[NH3+]	L-valine	C5H11NO2	mRNA of Protein-tyrosine phosphatase, non-receptor type 1	Q99952	PTPN18
32	72-18-4	CC(C)C(C(=O)[O-])[NH3+]	L-valine	C5H11NO2	NAD-dependent malic enzyme, mitochondrial	P23368	ME2
32	72-18-4	CC(C)C(C(=O)[O-])[NH3+]	L-valine	C5H11NO2	Nitric-oxide synthase, brain	P29475	NOS1
32	72-18-4	CC(C)C(C(=O)[O-])[NH3+]	L-valine	C5H11NO2	Ornithine carbamoyltransferase, mitochondrial	P00480	OTC
32	72-18-4	CC(C)C(C(=O)[O-])[NH3+]	L-valine	C5H11NO2	Prostaglandin G/H synthase 1	P23219	PTGS1
32	72-18-4	CC(C)C(C(=O)[O-])[NH3+]	L-valine	C5H11NO2	Prostaglandin G/H synthase 2	P35354	PTGS2
32	72-18-4	CC(C)C(C(=O)[O-])[NH3+]	L-valine	C5H11NO2	S-adenosylmethionine synthetase isoform type-1	Q00266	MAT1A
33	301-00-8	CCC=CCC=CCC=CCCCCCCCC(=O)OC	Methyl Linolenate	C19H32O2	Prostaglandin G/H synthase 1	P23219	PTGS1
33	301-00-8	CCC=CCC=CCC=CCCCCCCCC(=O)OC	Methyl Linolenate	C19H32O2	Prostaglandin G/H synthase 2	P35354	PTGS2
33	301-00-8	CCC=CCC=CCC=CCCCCCCCC(=O)OC	Methyl Linolenate	C19H32O2	Retinoic acid receptor RXR-alpha	P19793	RXRA
33	301-00-8	CCC=CCC=CCC=CCCCCCCCC(=O)OC	Methyl Linolenate	C19H32O2	Sodium-dependent noradrenaline transporter	P23975	SLC6A2
33	301-00-8	CCC=CCC=CCC=CCCCCCCCC(=O)OC	Methyl Linolenate	C19H32O2	Nuclear receptor coactivator 2	Q15596	NCOA2
34	2566-97-4	CCCCCC=CCC=CCCCCCCCC(=O)OC	Methyl octadeca-9,12-dienoate	C19H34O2	Prostaglandin G/H synthase 1	P23219	PTGS1
34	2566-97-4	CCCCCC=CCC=CCCCCCCCC(=O)OC	Methyl octadeca-9,12-dienoate	C19H34O2	Prostaglandin G/H synthase 2	P35354	PTGS2
34	2566-97-4	CCCCCC=CCC=CCCCCCCCC(=O)OC	Methyl octadeca-9,12-dienoate	C19H34O2	Retinoic acid receptor RXR-alpha	P19793	RXRA
34	2566-97-4	CCCCCC=CCC=CCCCCCCCC(=O)OC	Methyl octadeca-9,12-dienoate	C19H34O2	Nuclear receptor coactivator 2	Q15596	NCOA2
35	57-10-3	CCCCCCCCCCCCCCCC(=O)O	Palmitic acid	C16H32O2	Alcohol dehydrogenase 1B	P00325	ADH1B
35	57-10-3	CCCCCCCCCCCCCCCC(=O)O	Palmitic acid	C16H32O2	Alcohol dehydrogenase 1C	P00326	ADH1C
35	57-10-3	CCCCCCCCCCCCCCCC(=O)O	Palmitic acid	C16H32O2	Apoptosis regulator Bcl-2	P10415	BCL2
35	57-10-3	CCCCCCCCCCCCCCCC(=O)O	Palmitic acid	C16H32O2	Cathepsin D	P07339	CTSD
35	57-10-3	CCCCCCCCCCCCCCCC(=O)O	Palmitic acid	C16H32O2	Choline-phosphate cytidylyltransferase A	P49585	PCYT1A
35	57-10-3	CCCCCCCCCCCCCCCC(=O)O	Palmitic acid	C16H32O2	Collagen alpha-1(I) chain	P02452	COL1A1
35	57-10-3	CCCCCCCCCCCCCCCC(=O)O	Palmitic acid	C16H32O2	Ig gamma-1 chain C region	P01857	IGHG1
35	57-10-3	CCCCCCCCCCCCCCCC(=O)O	Palmitic acid	C16H32O2	Interleukin-10	P22301	IL10
35	57-10-3	CCCCCCCCCCCCCCCC(=O)O	Palmitic acid	C16H32O2	Nuclear receptor coactivator 2	Q15596	NCOA2
35	57-10-3	CCCCCCCCCCCCCCCC(=O)O	Palmitic acid	C16H32O2	Phosphatidylinositol-3,4,5-trisphosphate 3-phosphatase and dual-specificity protein phosphatase PTEN	P60484	PTEN
35	57-10-3	CCCCCCCCCCCCCCCC(=O)O	Palmitic acid	C16H32O2	Prostaglandin G/H synthase 1	P23219	PTGS1
35	57-10-3	CCCCCCCCCCCCCCCC(=O)O	Palmitic acid	C16H32O2	Prostaglandin G/H synthase 2	P35354	PTGS2
35	57-10-3	CCCCCCCCCCCCCCCC(=O)O	Palmitic acid	C16H32O2	Putative beta-glucuronidase-like protein SMA3	Q15486	GUSBP1
35	57-10-3	CCCCCCCCCCCCCCCC(=O)O	Palmitic acid	C16H32O2	Rhodopsin	P08100	RHO
35	57-10-3	CCCCCCCCCCCCCCCC(=O)O	Palmitic acid	C16H32O2	Solute carrier family 22 member 5	O76082	SLC22A5
35	57-10-3	CCCCCCCCCCCCCCCC(=O)O	Palmitic acid	C16H32O2	Tumor necrosis factor	O00220	TNFRSF10A
36	63-91-2	C1=CC=C(C=C1)CC(C(=O)O)N	L-phenylalanine	C9H11NO2	Acetylcholinesterase	P22303	ACHE
36	63-91-2	C1=CC=C(C=C1)CC(C(=O)O)N	L-phenylalanine	C9H11NO2	Alpha-1A adrenergic receptor	P35348	ADRA1A
36	63-91-2	C1=CC=C(C=C1)CC(C(=O)O)N	L-phenylalanine	C9H11NO2	Alpha-1B adrenergic receptor	P35368	ADRA1B
36	63-91-2	C1=CC=C(C=C1)CC(C(=O)O)N	L-phenylalanine	C9H11NO2	Alpha-2A adrenergic receptor	P08913	ADRA2A
36	63-91-2	C1=CC=C(C=C1)CC(C(=O)O)N	L-phenylalanine	C9H11NO2	Alpha-2B adrenergic receptor	P18089	ADRA2B
36	63-91-2	C1=CC=C(C=C1)CC(C(=O)O)N	L-phenylalanine	C9H11NO2	Alpha-2C adrenergic receptor	P18825	ADRA2C
36	63-91-2	C1=CC=C(C=C1)CC(C(=O)O)N	L-phenylalanine	C9H11NO2	Amine oxidase [flavin-containing] A	P21397	MAOA
36	63-91-2	C1=CC=C(C=C1)CC(C(=O)O)N	L-phenylalanine	C9H11NO2	Amine oxidase [flavin-containing] B	P27338	MAOB
36	63-91-2	C1=CC=C(C=C1)CC(C(=O)O)N	L-phenylalanine	C9H11NO2	Beta-1 adrenergic receptor	P08588	ADRB1
36	63-91-2	C1=CC=C(C=C1)CC(C(=O)O)N	L-phenylalanine	C9H11NO2	Beta-2 adrenergic receptor	P07550	ADRB2
36	63-91-2	C1=CC=C(C=C1)CC(C(=O)O)N	L-phenylalanine	C9H11NO2	Beta-lactamase	Q96BR5	COA7
36	63-91-2	C1=CC=C(C=C1)CC(C(=O)O)N	L-phenylalanine	C9H11NO2	Chymotrypsinogen B	P17538	CTRB1
36	63-91-2	C1=CC=C(C=C1)CC(C(=O)O)N	L-phenylalanine	C9H11NO2	Dipeptidyl peptidase IV	P27487	DPP4
36	63-91-2	C1=CC=C(C=C1)CC(C(=O)O)N	L-phenylalanine	C9H11NO2	Dopamine D1 receptor	P21728	DRD1
36	63-91-2	C1=CC=C(C=C1)CC(C(=O)O)N	L-phenylalanine	C9H11NO2	Lysozyme	O75951	LYZL6
36	63-91-2	C1=CC=C(C=C1)CC(C(=O)O)N	L-phenylalanine	C9H11NO2	Muscarinic acetylcholine receptor M1	P11229	CHRM1
36	63-91-2	C1=CC=C(C=C1)CC(C(=O)O)N	L-phenylalanine	C9H11NO2	Nitric-oxide synthase, endothelial	P29474	NOS3
36	63-91-2	C1=CC=C(C=C1)CC(C(=O)O)N	L-phenylalanine	C9H11NO2	Prostaglandin G/H synthase 1	P23219	PTGS1
36	63-91-2	C1=CC=C(C=C1)CC(C(=O)O)N	L-phenylalanine	C9H11NO2	Prostaglandin G/H synthase 2	P35354	PTGS2
36	63-91-2	C1=CC=C(C=C1)CC(C(=O)O)N	L-phenylalanine	C9H11NO2	Sodium channel protein type 5 subunit alpha	Q14524	SCN5A
36	63-91-2	C1=CC=C(C=C1)CC(C(=O)O)N	L-phenylalanine	C9H11NO2	Sodium-dependent dopamine transporter	Q01959	SLC6A3
36	63-91-2	C1=CC=C(C=C1)CC(C(=O)O)N	L-phenylalanine	C9H11NO2	Sodium-dependent noradrenaline transporter	P23975	SLC6A2
36	63-91-2	C1=CC=C(C=C1)CC(C(=O)O)N	L-phenylalanine	C9H11NO2	Thrombin	P25116	F2R
37	4305-67-3	C1CC([NH2+]C1)C(=O)[O-]	L-proline	C5H9NO2	Alcohol dehydrogenase 1A	P07327	ADH1A
37	4305-67-3	C1CC([NH2+]C1)C(=O)[O-]	L-proline	C5H9NO2	Alcohol dehydrogenase 1B	P00325	ADH1B
37	4305-67-3	C1CC([NH2+]C1)C(=O)[O-]	L-proline	C5H9NO2	Alcohol dehydrogenase 1C	P00326	ADH1C
37	4305-67-3	C1CC([NH2+]C1)C(=O)[O-]	L-proline	C5H9NO2	Cathepsin D	P07339	CTSD
37	4305-67-3	C1CC([NH2+]C1)C(=O)[O-]	L-proline	C5H9NO2	Cholinesterase	P06276	BCHE
37	4305-67-3	C1CC([NH2+]C1)C(=O)[O-]	L-proline	C5H9NO2	D-amino-acid oxidase	P14920	DAO
37	4305-67-3	C1CC([NH2+]C1)C(=O)[O-]	L-proline	C5H9NO2	Gamma-aminobutyric acid receptor subunit alpha-1	P14867	GABRA1
37	4305-67-3	C1CC([NH2+]C1)C(=O)[O-]	L-proline	C5H9NO2	Gamma-aminobutyric-acid receptor alpha-2 subunit	P47869	GABRA2
37	4305-67-3	C1CC([NH2+]C1)C(=O)[O-]	L-proline	C5H9NO2	Gamma-aminobutyric-acid receptor subunit alpha-6	Q16445	GABRA6
37	4305-67-3	C1CC([NH2+]C1)C(=O)[O-]	L-proline	C5H9NO2	Glycine amidinotransferase, mitochondrial	P50440	GATM
37	4305-67-3	C1CC([NH2+]C1)C(=O)[O-]	L-proline	C5H9NO2	Lysozyme	O75951	LYZL6
37	4305-67-3	C1CC([NH2+]C1)C(=O)[O-]	L-proline	C5H9NO2	Peptidyl-prolyl cis-trans isomerase A	P62937	PPIA
37	4305-67-3	C1CC([NH2+]C1)C(=O)[O-]	L-proline	C5H9NO2	Peptidyl-prolyl cis-trans isomerase, mitochondrial	Q9Y237	PIN4
37	4305-67-3	C1CC([NH2+]C1)C(=O)[O-]	L-proline	C5H9NO2	Prolyl 4-hydroxylase subunit alpha-1	P13674	P4HA1
37	4305-67-3	C1CC([NH2+]C1)C(=O)[O-]	L-proline	C5H9NO2	Prostaglandin G/H synthase 2	P35354	PTGS2
37	4305-67-3	C1CC([NH2+]C1)C(=O)[O-]	L-proline	C5H9NO2	Trypsin-3	P35030	PRSS3
38	92-61-5	COC1=C(C=C2C(=C1)C=CC(=O)O2)O	Scopoletol	C10H8O4	Amine oxidase [flavin-containing] B	P27338	MAOB
38	92-61-5	COC1=C(C=C2C(=C1)C=CC(=O)O2)O	Scopoletol	C10H8O4	Beta-2 adrenergic receptor	P07550	ADRB2
38	92-61-5	COC1=C(C=C2C(=C1)C=CC(=O)O2)O	Scopoletol	C10H8O4	Carbonic anhydrase I	P00918	CA2
38	92-61-5	COC1=C(C=C2C(=C1)C=CC(=O)O2)O	Scopoletol	C10H8O4	Glutamate receptor 2	P42262	GRIA2
38	92-61-5	COC1=C(C=C2C(=C1)C=CC(=O)O2)O	Scopoletol	C10H8O4	Leukotriene A-4 hydrolase	P09960	LTA4H
38	92-61-5	COC1=C(C=C2C(=C1)C=CC(=O)O2)O	Scopoletol	C10H8O4	mRNA of PKA Catalytic Subunit C-alpha	P17612	PRKACA
38	92-61-5	COC1=C(C=C2C(=C1)C=CC(=O)O2)O	Scopoletol	C10H8O4	NRH dehydrogenase [quinone] 2	P16083	NQO2
38	92-61-5	COC1=C(C=C2C(=C1)C=CC(=O)O2)O	Scopoletol	C10H8O4	Prostaglandin G/H synthase 1	P23219	PTGS1
38	92-61-5	COC1=C(C=C2C(=C1)C=CC(=O)O2)O	Scopoletol	C10H8O4	Prostaglandin G/H synthase 2	P35354	PTGS2
38	92-61-5	COC1=C(C=C2C(=C1)C=CC(=O)O2)O	Scopoletol	C10H8O4	Queuine tRNA-ribosyltransferase	Q9BXR0	QTRT1
38	92-61-5	COC1=C(C=C2C(=C1)C=CC(=O)O2)O	Scopoletol	C10H8O4	Sodium-dependent noradrenaline transporter	P23975	SLC6A2
38	92-61-5	COC1=C(C=C2C(=C1)C=CC(=O)O2)O	Scopoletol	C10H8O4	Thrombin	P25116	F2R
39	54707-47-0	CC(=C1CC2C(=C)CCCC2(CC0=O)C)C	Selina-4(14),7(11)-dien-8-one	C15H22O	Gamma-aminobutyric acid receptor subunit alpha-1	P14867	GABRA1
39	54707-47-0	CC(=C1CC2C(=C)CCCC2(CC1=O)C)C	Selina-4(14),7(11)-dien-8-one	C15H22O	Gamma-aminobutyric-acid receptor alpha-2 subunit	P47869	GABRA2
39	54707-47-0	CC(=C1CC2C(=C)CCCC2(CC1=O)C)C	Selina-4(14),7(11)-dien-8-one	C15H22O	Gamma-aminobutyric-acid receptor alpha-3 subunit	P34903	GABRA3
39	54707-47-0	CC(=C1CC2C(=C)CCCC2(CC1=O)C)C	Selina-4(14),7(11)-dien-8-one	C15H22O	Gamma-aminobutyric-acid receptor subunit alpha-6	Q16445	GABRA6
39	54707-47-0	CC(=C1CC2C(=C)CCCC2(CC1=O)C)C	Selina-4(14),7(11)-dien-8-one	C15H22O	Muscarinic acetylcholine receptor M1	P11229	CHRM1
39	54707-47-0	CC(=C1CC2C(=C)CCCC2(CC1=O)C)C	Selina-4(14),7(11)-dien-8-one	C15H22O	Muscarinic acetylcholine receptor M2	P08172	CHRM2
39	54707-47-0	CC(=C1CC2C(=C)CCCC2(CC1=O)C)C	Selina-4(14),7(11)-dien-8-one	C15H22O	Muscarinic acetylcholine receptor M3	P20309	CHRM3
39	54707-47-0	CC(=C1CC2C(=C)CCCC2(CC1=O)C)C	Selina-4(14),7(11)-dien-8-one	C15H22O	Neuronal acetylcholine receptor protein, alpha-7 chain	P36544	CHRNA7
39	54707-47-0	CC(=C1CC2C(=C)CCCC2(CC1=O)C)C	Selina-4(14),7(11)-dien-8-one	C15H22O	Prostaglandin G/H synthase 2	P35354	PTGS2
39	54707-47-0	CC(=C1CC2C(=C)CCCC2(CC1=O)C)C	Selina-4(14),7(11)-dien-8-one	C15H22O	Sodium-dependent noradrenaline transporter	P23975	SLC6A2
40	3681-93-4	C1=CC(=CC=C1C2=CC(=O)C3=C(O2)C(=C(C=C3O)O)C4C(C(C(C(O4)CO)O)O)O)O	Vitexin	C21H20O10	Androgen receptor	P10275	AR
40	3681-93-4	C1=CC(=CC=C1C2=CC(=O)C3=C(O2)C(=C(C=C3O)O)C4C(C(C(C(O4)CO)O)O)O)O	Vitexin	C21H20O10	Coagulation factor X	P00488	F13A1
40	3681-93-4	C1=CC(=CC=C1C2=CC(=O)C3=C(O2)C(=C(C=C3O)O)C4C(C(C(C(O4)CO)O)O)O)O	Vitexin	C21H20O10	Prostaglandin G/H synthase 2	P35354	PTGS2
40	3681-93-4	C1=CC(=CC=C1C2=CC(=O)C3=C(O2)C(=C(C=C3O)O)C4C(C(C(C(O4)CO)O)O)O)O	Vitexin	C21H20O10	DNA topoisomerase 2-alpha	P11388	TOP2A
40	3681-93-4	C1=CC(=CC=C1C2=CC(=O)C3=C(O2)C(=C(C=C3O)O)C4C(C(C(C(O4)CO)O)O)O)O	Vitexin	C21H20O10	Choline/ethanolamine kinase	Q9Y259	CHKB
40	3681-93-4	C1=CC(=CC=C1C2=CC(=O)C3=C(O2)C(=C(C=C3O)O)C4C(C(C(C(O4)CO)O)O)O)O	Vitexin	C21H20O10	Mitogen-activated protein kinase 7	Q13164	MAPK7
41	3681-99-0	C1=CC(=CC=C1C2=COC3=C(C2=O)C=CC(=C3C4C(C(C(C(O4)CO)O)O)O)O)O	Puerarin	C21H20O9	Nitric oxide synthase, inducible	P35228	NOS2
41	3681-99-0	C1=CC(=CC=C1C2=COC3=C(C2=O)C=CC(=C3C4C(C(C(C(O4)CO)O)O)O)O)O	Puerarin	C21H20O9	Type-1 angiotensin II receptor	P30556	AGTR1
41	3681-99-0	C1=CC(=CC=C1C2=COC3=C(C2=O)C=CC(=C3C4C(C(C(C(O4)CO)O)O)O)O)O	Puerarin	C21H20O9	Estrogen receptor	P03372	ESR1
41	3681-99-0	C1=CC(=CC=C1C2=COC3=C(C2=O)C=CC(=C3C4C(C(C(C(O4)CO)O)O)O)O)O	Puerarin	C21H20O9	Androgen receptor	P10275	AR
41	3681-99-0	C1=CC(=CC=C1C2=COC3=C(C2=O)C=CC(=C3C4C(C(C(C(O4)CO)O)O)O)O)O	Puerarin	C21H20O9	Apoptosis regulator Bcl-2	P10415	BCL2
41	3681-99-0	C1=CC(=CC=C1C2=COC3=C(C2=O)C=CC(=C3C4C(C(C(C(O4)CO)O)O)O)O)O	Puerarin	C21H20O9	Prostaglandin G/H synthase 2	P35354	PTGS2
41	3681-99-0	C1=CC(=CC=C1C2=COC3=C(C2=O)C=CC(=C3C4C(C(C(C(O4)CO)O)O)O)O)O	Puerarin	C21H20O9	Carbonic anhydrase 2	P00918	CA2
41	3681-99-0	C1=CC(=CC=C1C2=COC3=C(C2=O)C=CC(=C3C4C(C(C(C(O4)CO)O)O)O)O)O	Puerarin	C21H20O9	Tyrosine-protein phosphatase non-receptor type 1	P18031	PTPN1
41	3681-99-0	C1=CC(=CC=C1C2=COC3=C(C2=O)C=CC(=C3C4C(C(C(C(O4)CO)O)O)O)O)O	Puerarin	C21H20O9	72 kDa type IV collagenase	P08253	MMP2
41	3681-99-0	C1=CC(=CC=C1C2=COC3=C(C2=O)C=CC(=C3C4C(C(C(C(O4)CO)O)O)O)O)O	Puerarin	C21H20O9	Tumor necrosis factor	O00220	TNFRSF10A
41	3681-99-0	C1=CC(=CC=C1C2=COC3=C(C2=O)C=CC(=C3C4C(C(C(C(O4)CO)O)O)O)O)O	Puerarin	C21H20O9	Aldose reductase	P15121	AKR1B1
41	3681-99-0	C1=CC(=CC=C1C2=COC3=C(C2=O)C=CC(=C3C4C(C(C(C(O4)CO)O)O)O)O)O	Puerarin	C21H20O9	Transcription factor AP-1	P05412	JUN
41	3681-99-0	C1=CC(=CC=C1C2=COC3=C(C2=O)C=CC(=C3C4C(C(C(C(O4)CO)O)O)O)O)O	Puerarin	C21H20O9	Glycogen synthase kinase-3 beta	P49841	GSK3B
41	3681-99-0	C1=CC(=CC=C1C2=COC3=C(C2=O)C=CC(=C3C4C(C(C(C(O4)CO)O)O)O)O)O	Puerarin	C21H20O9	Tissue-type plasminogen activator	P00750	PLAT
41	3681-99-0	C1=CC(=CC=C1C2=COC3=C(C2=O)C=CC(=C3C4C(C(C(C(O4)CO)O)O)O)O)O	Puerarin	C21H20O9	Vascular cell adhesion protein 1	P19320	VCAM1
41	3681-99-0	C1=CC(=CC=C1C2=COC3=C(C2=O)C=CC(=C3C4C(C(C(C(O4)CO)O)O)O)O)O	Puerarin	C21H20O9	P-selectin	P16109	SELP
41	3681-99-0	C1=CC(=CC=C1C2=COC3=C(C2=O)C=CC(=C3C4C(C(C(C(O4)CO)O)O)O)O)O	Puerarin	C21H20O9	Superoxide dismutase [Cu-Zn]	P00441	SOD1
41	3681-99-0	C1=CC(=CC=C1C2=COC3=C(C2=O)C=CC(=C3C4C(C(C(C(O4)CO)O)O)O)O)O	Puerarin	C21H20O9	Tyrosine-protein kinase JAK3	P52333	JAK3
41	3681-99-0	C1=CC(=CC=C1C2=COC3=C(C2=O)C=CC(=C3C4C(C(C(C(O4)CO)O)O)O)O)O	Puerarin	C21H20O9	Mitogen-activated protein kinase 9	P45984	MAPK9
41	3681-99-0	C1=CC(=CC=C1C2=COC3=C(C2=O)C=CC(=C3C4C(C(C(C(O4)CO)O)O)O)O)O	Puerarin	C21H20O9	Proto-oncogene serine/threonine-protein kinase Pim-1	P11309	PIM1
41	3681-99-0	C1=CC(=CC=C1C2=COC3=C(C2=O)C=CC(=C3C4C(C(C(C(O4)CO)O)O)O)O)O	Puerarin	C21H20O9	Alanine aminotransferase 1	P24298	GPT
41	3681-99-0	C1=CC(=CC=C1C2=COC3=C(C2=O)C=CC(=C3C4C(C(C(C(O4)CO)O)O)O)O)O	Puerarin	C21H20O9	Calmodulin	O94983	CAMTA2
41	3681-99-0	C1=CC(=CC=C1C2=COC3=C(C2=O)C=CC(=C3C4C(C(C(C(O4)CO)O)O)O)O)O	Puerarin	C21H20O9	Angiotensin-converting enzyme 2	Q9BYF1	ACE2
41	3681-99-0	C1=CC(=CC=C1C2=COC3=C(C2=O)C=CC(=C3C4C(C(C(C(O4)CO)O)O)O)O)O	Puerarin	C21H20O9	Apoptosis regulator BAX	Q07812	BAX
41	3681-99-0	C1=CC(=CC=C1C2=COC3=C(C2=O)C=CC(=C3C4C(C(C(C(O4)CO)O)O)O)O)O	Puerarin	C21H20O9	Baculoviral IAP repeat-containing protein 5	O15392	BIRC5
41	3681-99-0	C1=CC(=CC=C1C2=COC3=C(C2=O)C=CC(=C3C4C(C(C(C(O4)CO)O)O)O)O)O	Puerarin	C21H20O9	Bcl2 antagonist of cell death	Q92934	BAD
41	3681-99-0	C1=CC(=CC=C1C2=COC3=C(C2=O)C=CC(=C3C4C(C(C(C(O4)CO)O)O)O)O)O	Puerarin	C21H20O9	Caspase-3	P42574	CASP3
41	3681-99-0	C1=CC(=CC=C1C2=COC3=C(C2=O)C=CC(=C3C4C(C(C(C(O4)CO)O)O)O)O)O	Puerarin	C21H20O9	Caspase-8	Q14790	CASP8
41	3681-99-0	C1=CC(=CC=C1C2=COC3=C(C2=O)C=CC(=C3C4C(C(C(C(O4)CO)O)O)O)O)O	Puerarin	C21H20O9	Caspase-9	P55211	CASP9
41	3681-99-0	C1=CC(=CC=C1C2=COC3=C(C2=O)C=CC(=C3C4C(C(C(C(O4)CO)O)O)O)O)O	Puerarin	C21H20O9	CDKN2A-interacting protein	Q9NXV6	CDKN2AIP
41	3681-99-0	C1=CC(=CC=C1C2=COC3=C(C2=O)C=CC(=C3C4C(C(C(C(O4)CO)O)O)O)O)O	Puerarin	C21H20O9	Cyclin-dependent kinase inhibitor 1B	P46527	CDKN1B
41	3681-99-0	C1=CC(=CC=C1C2=COC3=C(C2=O)C=CC(=C3C4C(C(C(C(O4)CO)O)O)O)O)O	Puerarin	C21H20O9	Cytochrome P450 19A1	P11511	CYP19A1
41	3681-99-0	C1=CC(=CC=C1C2=COC3=C(C2=O)C=CC(=C3C4C(C(C(C(O4)CO)O)O)O)O)O	Puerarin	C21H20O9	Hypoxia-inducible factor 1-alpha	Q16665	HIF1A
41	3681-99-0	C1=CC(=CC=C1C2=COC3=C(C2=O)C=CC(=C3C4C(C(C(C(O4)CO)O)O)O)O)O	Puerarin	C21H20O9	Integrin beta-5	P18084	ITGB5
41	3681-99-0	C1=CC(=CC=C1C2=COC3=C(C2=O)C=CC(=C3C4C(C(C(C(O4)CO)O)O)O)O)O	Puerarin	C21H20O9	Interferon alpha-1/13	P01562	IFNA1;
41	3681-99-0	C1=CC(=CC=C1C2=COC3=C(C2=O)C=CC(=C3C4C(C(C(C(O4)CO)O)O)O)O)O	Puerarin	C21H20O9	Leptin receptor	O15243	LEPROT
41	3681-99-0	C1=CC(=CC=C1C2=COC3=C(C2=O)C=CC(=C3C4C(C(C(C(O4)CO)O)O)O)O)O	Puerarin	C21H20O9	Matrix metalloproteinase-9	P14780	MMP9
41	3681-99-0	C1=CC(=CC=C1C2=COC3=C(C2=O)C=CC(=C3C4C(C(C(C(O4)CO)O)O)O)O)O	Puerarin	C21H20O9	Metalloproteinase inhibitor 2	P16035	TIMP2
41	3681-99-0	C1=CC(=CC=C1C2=COC3=C(C2=O)C=CC(=C3C4C(C(C(C(O4)CO)O)O)O)O)O	Puerarin	C21H20O9	NF-kappa-B inhibitor alpha	P25963	NFKBIA
41	3681-99-0	C1=CC(=CC=C1C2=COC3=C(C2=O)C=CC(=C3C4C(C(C(C(O4)CO)O)O)O)O)O	Puerarin	C21H20O9	Nitric oxide synthase, endothelial	P29474	NOS3
41	3681-99-0	C1=CC(=CC=C1C2=COC3=C(C2=O)C=CC(=C3C4C(C(C(C(O4)CO)O)O)O)O)O	Puerarin	C21H20O9	Perilipin-2	Q99541	PLIN2
41	3681-99-0	C1=CC(=CC=C1C2=COC3=C(C2=O)C=CC(=C3C4C(C(C(C(O4)CO)O)O)O)O)O	Puerarin	C21H20O9	Peroxisome proliferator-activated receptor gamma	P37231	PPARG
41	3681-99-0	C1=CC(=CC=C1C2=COC3=C(C2=O)C=CC(=C3C4C(C(C(C(O4)CO)O)O)O)O)O	Puerarin	C21H20O9	Platelet-derived growth factor subunit A	P04085	PDGFA
41	3681-99-0	C1=CC(=CC=C1C2=COC3=C(C2=O)C=CC(=C3C4C(C(C(C(O4)CO)O)O)O)O)O	Puerarin	C21H20O9	Proteinase-activated receptor 1	P25116	F2R
41	3681-99-0	C1=CC(=CC=C1C2=COC3=C(C2=O)C=CC(=C3C4C(C(C(C(O4)CO)O)O)O)O)O	Puerarin	C21H20O9	Protein kinase C alpha type	P17252	PRKCA
41	3681-99-0	C1=CC(=CC=C1C2=COC3=C(C2=O)C=CC(=C3C4C(C(C(C(O4)CO)O)O)O)O)O	Puerarin	C21H20O9	Proto-oncogene c-Fos	P01100	FOS
41	3681-99-0	C1=CC(=CC=C1C2=COC3=C(C2=O)C=CC(=C3C4C(C(C(C(O4)CO)O)O)O)O)O	Puerarin	C21H20O9	RAC-alpha serine/threonine-protein kinase	P31749	AKT1
41	3681-99-0	C1=CC(=CC=C1C2=COC3=C(C2=O)C=CC(=C3C4C(C(C(C(O4)CO)O)O)O)O)O	Puerarin	C21H20O9	Serine/threonine-protein kinase Chk2	O96017	CHEK2
41	3681-99-0	C1=CC(=CC=C1C2=COC3=C(C2=O)C=CC(=C3C4C(C(C(C(O4)CO)O)O)O)O)O	Puerarin	C21H20O9	Signal transducer and activator of transcription 3	P40763	STAT3
41	3681-99-0	C1=CC(=CC=C1C2=COC3=C(C2=O)C=CC(=C3C4C(C(C(C(O4)CO)O)O)O)O)O	Puerarin	C21H20O9	Transcription factor p65	Q04206	RELA
41	3681-99-0	C1=CC(=CC=C1C2=COC3=C(C2=O)C=CC(=C3C4C(C(C(C(O4)CO)O)O)O)O)O	Puerarin	C21H20O9	Tumor necrosis factor receptor superfamily member 6	O95407	TNFRSF6B
42	5989-08-2	CC1=CCC2C3C1C2(CCCC3(C)C)C	α-longipinene	C15H24	Gamma-aminobutyric acid receptor subunit alpha-1	P14867	GABRA1
42	5989-08-2	CC1=CCC2C3C1C2(CCCC3(C)C)C	α-longipinene	C15H24	Muscarinic acetylcholine receptor M3	P20309	CHRM3
42	5989-08-2	CC1=CCC2C3C1C2(CCCC3(C)C)C	α-longipinene	C15H24	Prostaglandin G/H synthase 2	P35354	PTGS2
43	118-34-3	COC1=CC(=CC(=C1OC2C(C(C(C(O2)CO)O)O)O)OC)C=CCO	Syringin	C21H36O10	Alpha-1A adrenergic receptor	P35348	ADRA1A
43	118-34-3	COC1=CC(=CC(=C1OC2C(C(C(C(O2)CO)O)O)O)OC)C=CCO	Syringin	C21H36O10	Gamma-aminobutyric acid receptor subunit alpha-1	P14867	GABRA1
43	118-34-3	COC1=CC(=CC(=C1OC2C(C(C(C(O2)CO)O)O)O)OC)C=CCO	Syringin	C21H36O10	Gamma-aminobutyric-acid receptor alpha-2 subunit	P47869	GABRA2
43	118-34-3	COC1=CC(=CC(=C1OC2C(C(C(C(O2)CO)O)O)O)OC)C=CCO	Syringin	C21H36O10	Gamma-aminobutyric-acid receptor alpha-3 subunit	P34903	GABRA3
43	118-34-3	COC1=CC(=CC(=C1OC2C(C(C(C(O2)CO)O)O)O)OC)C=CCO	Syringin	C21H36O10	Gamma-aminobutyric-acid receptor subunit alpha-6	Q16445	GABRA6
43	118-34-3	COC1=CC(=CC(=C1OC2C(C(C(C(O2)CO)O)O)O)OC)C=CCO	Syringin	C21H36O10	Muscarinic acetylcholine receptor M2	P08172	CHRM2
43	118-34-3	COC1=CC(=CC(=C1OC2C(C(C(C(O2)CO)O)O)O)OC)C=CCO	Syringin	C21H36O10	Muscarinic acetylcholine receptor M3	P20309	CHRM3
43	118-34-3	COC1=CC(=CC(=C1OC2C(C(C(C(O2)CO)O)O)O)OC)C=CCO	Syringin	C21H36O10	Prostaglandin G/H synthase 1	P23219	PTGS1
43	118-34-3	COC1=CC(=CC(=C1OC2C(C(C(C(O2)CO)O)O)O)OC)C=CCO	Syringin	C21H36O10	Prostaglandin G/H synthase 2	P35354	PTGS2
43	118-34-3	COC1=CC(=CC(=C1OC2C(C(C(C(O2)CO)O)O)O)OC)C=CCO	Syringin	C21H36O10	Retinoic acid receptor RXR-alpha	P19793	RXRA
43	118-34-3	COC1=CC(=CC(=C1OC2C(C(C(C(O2)CO)O)O)O)OC)C=CCO	Syringin	C21H36O10	Sodium-dependent noradrenaline transporter	P23975	SLC6A2
44	111-03-5	CCCCCCCCC=CCCCCCCCC(=O)OCC(CO)O	Monoolein	C21H40O4	Nuclear receptor coactivator 2	Q15596	NCOA2
45	38665-01-9	CC1C(C(C(C(O1)OC2C(C(C(OC2OC3=CC(=C4C(=C3)OC(=CC4=O)C5=CC(=C(C=C5)OC)O)O)CO)O)O)O)O)O	Neodiosmin	C28H32O15	TNF-alpha	P01375	TNF
45	38665-01-9	CC1C(C(C(C(O1)OC2C(C(C(OC2OC3=CC(=C4C(=C3)OC(=CC4=O)C5=CC(=C(C=C5)OC)O)O)CO)O)O)O)O)O	Neodiosmin	C28H32O15	Interleukin-2	P60568	IL2
45	38665-01-9	CC1C(C(C(C(O1)OC2C(C(C(OC2OC3=CC(=C4C(=C3)OC(=CC4=O)C5=CC(=C(C=C5)OC)O)O)CO)O)O)O)O)O	Neodiosmin	C28H32O15	Xanthine dehydrogenase	P47989	XDH
45	38665-01-9	CC1C(C(C(C(O1)OC2C(C(C(OC2OC3=CC(=C4C(=C3)OC(=CC4=O)C5=CC(=C(C=C5)OC)O)O)CO)O)O)O)O)O	Neodiosmin	C28H32O15	Aldose reductase	P15121	AKR1B1
45	38665-01-9	CC1C(C(C(C(O1)OC2C(C(C(OC2OC3=CC(=C4C(=C3)OC(=CC4=O)C5=CC(=C(C=C5)OC)O)O)CO)O)O)O)O)O	Neodiosmin	C28H32O15	Adenosine A1 receptor	P30542	ADORA1
45	38665-01-9	CC1C(C(C(C(O1)OC2C(C(C(OC2OC3=CC(=C4C(=C3)OC(=CC4=O)C5=CC(=C(C=C5)OC)O)O)CO)O)O)O)O)O	Neodiosmin	C28H32O15	Neuromedin-U receptor 2	Q9GZQ4	NMUR2
45	38665-01-9	CC1C(C(C(C(O1)OC2C(C(C(OC2OC3=CC(=C4C(=C3)OC(=CC4=O)C5=CC(=C(C=C5)OC)O)O)CO)O)O)O)O)O	Neodiosmin	C28H32O15	Alpha-2a adrenergic receptor	P08913	ADRA2A
45	38665-01-9	CC1C(C(C(C(O1)OC2C(C(C(OC2OC3=CC(=C4C(=C3)OC(=CC4=O)C5=CC(=C(C=C5)OC)O)O)CO)O)O)O)O)O	Neodiosmin	C28H32O15	Adrenergic receptor alpha-2	P18825	ADRA2C
45	38665-01-9	CC1C(C(C(C(O1)OC2C(C(C(OC2OC3=CC(=C4C(=C3)OC(=CC4=O)C5=CC(=C(C=C5)OC)O)O)CO)O)O)O)O)O	Neodiosmin	C28H32O15	Acetylcholinesterase	P22303	ACHE
45	38665-01-9	CC1C(C(C(C(O1)OC2C(C(C(OC2OC3=CC(=C4C(=C3)OC(=CC4=O)C5=CC(=C(C=C5)OC)O)O)CO)O)O)O)O)O	Neodiosmin	C28H32O15	NADPH oxidase 4	Q9NPH5	NOX4
45	38665-01-9	CC1C(C(C(C(O1)OC2C(C(C(OC2OC3=CC(=C4C(=C3)OC(=CC4=O)C5=CC(=C(C=C5)OC)O)O)CO)O)O)O)O)O	Neodiosmin	C28H32O15	Carbonic anhydrase II	P00918	CA2
45	38665-01-9	CC1C(C(C(C(O1)OC2C(C(C(OC2OC3=CC(=C4C(=C3)OC(=CC4=O)C5=CC(=C(C=C5)OC)O)O)CO)O)O)O)O)O	Neodiosmin	C28H32O15	Ribosomal protein S6 kinase alpha 3	P51812	RPS6KA3
45	38665-01-9	CC1C(C(C(C(O1)OC2C(C(C(OC2OC3=CC(=C4C(=C3)OC(=CC4=O)C5=CC(=C(C=C5)OC)O)O)CO)O)O)O)O)O	Neodiosmin	C28H32O15	Carbonic anhydrase VII	P43166	CA7
45	38665-01-9	CC1C(C(C(C(O1)OC2C(C(C(OC2OC3=CC(=C4C(=C3)OC(=CC4=O)C5=CC(=C(C=C5)OC)O)O)CO)O)O)O)O)O	Neodiosmin	C28H32O15	Carbonic anhydrase XII	O43570	CA12
45	38665-01-9	CC1C(C(C(C(O1)OC2C(C(C(OC2OC3=CC(=C4C(=C3)OC(=CC4=O)C5=CC(=C(C=C5)OC)O)O)CO)O)O)O)O)O	Neodiosmin	C28H32O15	Carbonic anhydrase IV	P22748	CA4
45	38665-01-9	CC1C(C(C(C(O1)OC2C(C(C(OC2OC3=CC(=C4C(=C3)OC(=CC4=O)C5=CC(=C(C=C5)OC)O)O)CO)O)O)O)O)O	Neodiosmin	C28H32O15	Quinone reductase 2	P16083	NQO2
45	38665-01-9	CC1C(C(C(C(O1)OC2C(C(C(OC2OC3=CC(=C4C(=C3)OC(=CC4=O)C5=CC(=C(C=C5)OC)O)O)CO)O)O)O)O)O	Neodiosmin	C28H32O15	Epidermal growth factor receptor erbB1	P00533	EGFR
45	38665-01-9	CC1C(C(C(C(O1)OC2C(C(C(OC2OC3=CC(=C4C(=C3)OC(=CC4=O)C5=CC(=C(C=C5)OC)O)O)CO)O)O)O)O)O	Neodiosmin	C28H32O15	Cyclooxygenase-2	P35354	PTGS2
45	38665-01-9	CC1C(C(C(C(O1)OC2C(C(C(OC2OC3=CC(=C4C(=C3)OC(=CC4=O)C5=CC(=C(C=C5)OC)O)O)CO)O)O)O)O)O	Neodiosmin	C28H32O15	Aldehyde dehydrogenase	P05091	ALDH2
45	38665-01-9	CC1C(C(C(C(O1)OC2C(C(C(OC2OC3=CC(=C4C(=C3)OC(=CC4=O)C5=CC(=C(C=C5)OC)O)O)CO)O)O)O)O)O	Neodiosmin	C28H32O15	Lymphocyte differentiation antigen CD38	P28907	CD38
45	38665-01-9	CC1C(C(C(C(O1)OC2C(C(C(OC2OC3=CC(=C4C(=C3)OC(=CC4=O)C5=CC(=C(C=C5)OC)O)O)CO)O)O)O)O)O	Neodiosmin	C28H32O15	Carbonic anhydrase I	P00915	CA1
45	38665-01-9	CC1C(C(C(C(O1)OC2C(C(C(OC2OC3=CC(=C4C(=C3)OC(=CC4=O)C5=CC(=C(C=C5)OC)O)O)CO)O)O)O)O)O	Neodiosmin	C28H32O15	Carbonic anhydrase IX	Q16790	CA9
45	38665-01-9	CC1C(C(C(C(O1)OC2C(C(C(OC2OC3=CC(=C4C(=C3)OC(=CC4=O)C5=CC(=C(C=C5)OC)O)O)CO)O)O)O)O)O	Neodiosmin	C28H32O15	Squalene monooxygenase	Q14534	SQLE
45	38665-01-9	CC1C(C(C(C(O1)OC2C(C(C(OC2OC3=CC(=C4C(=C3)OC(=CC4=O)C5=CC(=C(C=C5)OC)O)O)CO)O)O)O)O)O	Neodiosmin	C28H32O15	Arachidonate 5-lipoxygenase	P09917	ALOX5
46	93-35-6	C1=CC(=CC2=C1C=CC(=O)O2)O	7-Hydroxycoumarin	C9H6O3	Prostaglandin G/H synthase 1	P23219	PTGS1
46	93-35-6	C1=CC(=CC2=C1C=CC(=O)O2)O	7-Hydroxycoumarin	C9H6O3	Prothrombin	P00734	F2
46	93-35-6	C1=CC(=CC2=C1C=CC(=O)O2)O	7-Hydroxycoumarin	C9H6O3	Prostaglandin G/H synthase 2	P35354	PTGS2
46	93-35-6	C1=CC(=CC2=C1C=CC(=O)O2)O	7-Hydroxycoumarin	C9H6O3	Alpha-2A adrenergic receptor	P08913	ADRA2A
46	93-35-6	C1=CC(=CC2=C1C=CC(=O)O2)O	7-Hydroxycoumarin	C9H6O3	Alpha-2C adrenergic receptor	P18825	ADRA2C
46	93-35-6	C1=CC(=CC2=C1C=CC(=O)O2)O	7-Hydroxycoumarin	C9H6O3	Alpha-2B adrenergic receptor	P18089	ADRA2B
46	93-35-6	C1=CC(=CC2=C1C=CC(=O)O2)O	7-Hydroxycoumarin	C9H6O3	Cathepsin D	P07339	CTSD
46	93-35-6	C1=CC(=CC2=C1C=CC(=O)O2)O	7-Hydroxycoumarin	C9H6O3	Leukotriene A-4 hydrolase	P09960	LTA4H
46	93-35-6	C1=CC(=CC2=C1C=CC(=O)O2)O	7-Hydroxycoumarin	C9H6O3	Amine oxidase [flavin-containing] B	P27338	MAOB
46	93-35-6	C1=CC(=CC2=C1C=CC(=O)O2)O	7-Hydroxycoumarin	C9H6O3	Amine oxidase [flavin-containing] A	P21397	MAOA
47	67-47-0	C1=C(OC(=C1)C=O)CO	5-Hydroxymethylfurfural	C6H6O3	Prostaglandin G/H synthase 1	P23219	PTGS1
47	67-47-0	C1=C(OC(=C1)C=O)CO	5-Hydroxymethylfurfural	C6H6O3	Muscarinic acetylcholine receptor M3	P20309	CHRM3
47	67-47-0	C1=C(OC(=C1)C=O)CO	5-Hydroxymethylfurfural	C6H6O3	Prothrombin	P00734	F2
47	67-47-0	C1=C(OC(=C1)C=O)CO	5-Hydroxymethylfurfural	C6H6O3	Muscarinic acetylcholine receptor M1	P11229	CHRM1
47	67-47-0	C1=C(OC(=C1)C=O)CO	5-Hydroxymethylfurfural	C6H6O3	Prostaglandin G/H synthase 2	P35354	PTGS2
47	67-47-0	C1=C(OC(=C1)C=O)CO	5-Hydroxymethylfurfural	C6H6O3	Gamma-aminobutyric-acid receptor subunit	Q16445	GABRA6
47	67-47-0	C1=C(OC(=C1)C=O)CO	5-Hydroxymethylfurfural	C6H6O3	Acetylcholinesterase	P22303	ACHE
47	67-47-0	C1=C(OC(=C1)C=O)CO	5-Hydroxymethylfurfural	C6H6O3	Muscarinic acetylcholine receptor M2	P08172	CHRM2
47	67-47-0	C1=C(OC(=C1)C=O)CO	5-Hydroxymethylfurfural	C6H6O3	Lysozyme	O75951	LYZL6
47	67-47-0	C1=C(OC(=C1)C=O)CO	5-Hydroxymethylfurfural	C6H6O3	Ig gamma-1 chain C region	P01857	IGHG1
47	67-47-0	C1=C(OC(=C1)C=O)CO	5-Hydroxymethylfurfural	C6H6O3	Glutamate receptor 2	P42262	GRIA2
47	67-47-0	C1=C(OC(=C1)C=O)CO	5-Hydroxymethylfurfural	C6H6O3	Gamma-aminobutyric-acid receptor subunit alpha-6	Q16445	GABRA6
48	94-59-7	C=CCC1=CC2=C(C=C1)OCO2	Safrole	C10H10O2	Prostaglandin G/H synthase 1	P23219	PTGS1
48	94-59-7	C=CCC1=CC2=C(C=C1)OCO2	Safrole	C10H10O2	Muscarinic acetylcholine receptor M1	P11229	CHRM1
48	94-59-7	C=CCC1=CC2=C(C=C1)OCO2	Safrole	C10H10O2	Beta-1 adrenergic receptor	P08588	ADRB1
48	94-59-7	C=CCC1=CC2=C(C=C1)OCO2	Safrole	C10H10O2	Prostaglandin G/H synthase 2	P35354	PTGS2
48	94-59-7	C=CCC1=CC2=C(C=C1)OCO2	Safrole	C10H10O2	Alpha-2A adrenergic receptor	P08913	ADRA2A
48	94-59-7	C=CCC1=CC2=C(C=C1)OCO2	Safrole	C10H10O2	Alpha-2C adrenergic receptor	P18825	ADRA2C
48	94-59-7	C=CCC1=CC2=C(C=C1)OCO2	Safrole	C10H10O2	Sodium-dependent noradrenaline transporter	P23975	SLC6A2
48	94-59-7	C=CCC1=CC2=C(C=C1)OCO2	Safrole	C10H10O2	Alpha-1A adrenergic receptor	P35348	ADRA1A
48	94-59-7	C=CCC1=CC2=C(C=C1)OCO2	Safrole	C10H10O2	Muscarinic acetylcholine receptor M2	P08172	CHRM2
48	94-59-7	C=CCC1=CC2=C(C=C1)OCO2	Safrole	C10H10O2	Alpha-2B adrenergic receptor	P18089	ADRA2B
48	94-59-7	C=CCC1=CC2=C(C=C1)OCO2	Safrole	C10H10O2	Alpha-1B adrenergic receptor	P35368	ADRA1B
48	94-59-7	C=CCC1=CC2=C(C=C1)OCO2	Safrole	C10H10O2	Sodium-dependent dopamine transporter	Q01959	SLC6A3
48	94-59-7	C=CCC1=CC2=C(C=C1)OCO2	Safrole	C10H10O2	Beta-2 adrenergic receptor	P07550	ADRB2
48	94-59-7	C=CCC1=CC2=C(C=C1)OCO2	Safrole	C10H10O2	Alpha-1D adrenergic receptor	P25100	ADRA1D
48	94-59-7	C=CCC1=CC2=C(C=C1)OCO2	Safrole	C10H10O2	Cell division protein kinase 2	P24941	CDK2
48	94-59-7	C=CCC1=CC2=C(C=C1)OCO2	Safrole	C10H10O2	Beta-lactamase	Q96BR5	COA7
48	94-59-7	C=CCC1=CC2=C(C=C1)OCO2	Safrole	C10H10O2	Leukotriene A-4 hydrolase	P09960	LTA4H
48	94-59-7	C=CCC1=CC2=C(C=C1)OCO2	Safrole	C10H10O2	Amine oxidase [flavin-containing] B	P27338	MAOB
48	94-59-7	C=CCC1=CC2=C(C=C1)OCO2	Safrole	C10H10O2	Amine oxidase [flavin-containing] A	P21397	MAOA
48	94-59-7	C=CCC1=CC2=C(C=C1)OCO2	Safrole	C10H10O2	Lysozyme	O75951	LYZL6
48	94-59-7	C=CCC1=CC2=C(C=C1)OCO2	Safrole	C10H10O2	Chymotrypsinogen B	P17538	CTRB1
49	61206-10-8	-	3β-acetoxyatractylone	C17H22O3	Acetylcholinesterase	P22303	ACHE
49	61206-10-8	-	3β-acetoxyatractylone	C17H22O3	Alpha-1A adrenergic receptor	P35348	ADRA1A
49	61206-10-8	-	3β-acetoxyatractylone	C17H22O3	Androgen receptor	P10275	AR
49	61206-10-8	-	3β-acetoxyatractylone	C17H22O3	Beta-2 adrenergic receptor	P07550	ADRB2
49	61206-10-8	-	3β-acetoxyatractylone	C17H22O3	Dipeptidyl peptidase IV	P27487	DPP4
49	61206-10-8	-	3β-acetoxyatractylone	C17H22O3	Gamma-aminobutyric acid receptor subunit alpha-1	P14867	GABRA1
49	61206-10-8	-	3β-acetoxyatractylone	C17H22O3	Muscarinic acetylcholine receptor M1	P11229	CHRM1
49	61206-10-8	-	3β-acetoxyatractylone	C17H22O3	Muscarinic acetylcholine receptor M2	P08172	CHRM2
49	61206-10-8	-	3β-acetoxyatractylone	C17H22O3	Muscarinic acetylcholine receptor M3	P20309	CHRM3
49	61206-10-8	-	3β-acetoxyatractylone	C17H22O3	Mu-type opioid receptor	P35372	OPRM1
49	61206-10-8	-	3β-acetoxyatractylone	C17H22O3	Neuronal acetylcholine receptor protein, alpha-7 chain	P36544	CHRNA7
49	61206-10-8	-	3β-acetoxyatractylone	C17H22O3	Nitric-oxide synthase, endothelial	P29474	NOS3
49	61206-10-8	-	3β-acetoxyatractylone	C17H22O3	Prostaglandin G/H synthase 2	P35354	PTGS2
49	61206-10-8	-	3β-acetoxyatractylone	C17H22O3	Retinoic acid receptor RXR-alpha	P19793	RXRA
		-	3β-acetoxyatractylone	C17H22O3
49	61206-10-8	-	3β-acetoxyatractylone	C17H22O3	Sodium channel protein type 5 subunit alpha	Q14524	SCN5A
49	61206-10-8	-	3β-acetoxyatractylone	C17H22O3	Thrombin	P25116	F2R
50	113269-35-5	-	8β-ethoxyasterolid	C17H24O3	Gamma-aminobutyric acid receptor subunit alpha-1	P14867	GABRA1
50	113269-35-5	-	8β-ethoxyasterolid	C17H24O3	Neuronal acetylcholine receptor protein, alpha-7 chain	P36544	CHRNA7
50	113269-35-5	-	8β-ethoxyasterolid	C17H24O3	Nuclear receptor coactivator 1	Q15788	NCOA1
50	113269-35-5	-	8β-ethoxyasterolid	C17H24O3	Nuclear receptor coactivator 2	Q15596	NCOA2
50	113269-35-5	-	8β-ethoxyasterolid	C17H24O3	Prostaglandin G/H synthase 2	P35354	PTGS2
51	632-85-9	COC1=C(C=C(C2=C1OC(=CC2=O)C3=CC=CC=C3)O)O	Wogonin	C16H12O5	Glucocorticoid receptor	P04150	NR3C1
52	24268-41-5	CC1=CC(=O)C2=C(CC(=CCC1)C)OC=C2C	Furanodienon	C15H18O	Muscarinic acetylcholine receptor M2	P08172	CHRM2
52	24268-41-5	CC1=CC(=O)C2=C(CC(=CCC1)C)OC=C2C	Furanodienon	C15H18O	Gamma-aminobutyric-acid receptor subunit alpha-1	P14867	GABRA1
53	90-33-5	CC1=CC(=O)OC2=C1C=CC(=C2)O	7-Hydroxy-4-methylcoumarin	C10H8O3	Carbonic anhydrase XII	O43570	CA12
53	90-33-5	CC1=CC(=O)OC2=C1C=CC(=C2)O	7-Hydroxy-4-methylcoumarin	C10H8O3	Carbonic anhydrase IX	Q16790	CA9
53	90-33-5	CC1=CC(=O)OC2=C1C=CC(=C2)O	7-Hydroxy-4-methylcoumarin	C10H8O3	Estradiol 17-beta-dehydrogenase 3	P37058	HSD17B3
53	90-33-5	CC1=CC(=O)OC2=C1C=CC(=C2)O	7-Hydroxy-4-methylcoumarin	C10H8O3	Estrogen receptor beta	Q92731	ESR2
53	90-33-5	CC1=CC(=O)OC2=C1C=CC(=C2)O	7-Hydroxy-4-methylcoumarin	C10H8O3	Aldehyde dehydrogenase	P05091	ALDH2
53	90-33-5	CC1=CC(=O)OC2=C1C=CC(=C2)O	7-Hydroxy-4-methylcoumarin	C10H8O3	Estrogen receptor alpha	P03372	ESR1
53	90-33-5	CC1=CC(=O)OC2=C1C=CC(=C2)O	7-Hydroxy-4-methylcoumarin	C10H8O3	Epidermal growth factor receptor erbB1	P00533	EGFR
53	90-33-5	CC1=CC(=O)OC2=C1C=CC(=C2)O	7-Hydroxy-4-methylcoumarin	C10H8O3	Serine/threonine-protein kinase/endoribonuclease IRE1	O75460	ERN1
53	90-33-5	CC1=CC(=O)OC2=C1C=CC(=C2)O	7-Hydroxy-4-methylcoumarin	C10H8O3	Carbonic anhydrase II	P00918	CA2
53	90-33-5	CC1=CC(=O)OC2=C1C=CC(=C2)O	7-Hydroxy-4-methylcoumarin	C10H8O3	Carbonic anhydrase VII	P43166	CA7
53	90-33-5	CC1=CC(=O)OC2=C1C=CC(=C2)O	7-Hydroxy-4-methylcoumarin	C10H8O3	Carbonic anhydrase I	P00915	CA1
53	90-33-5	CC1=CC(=O)OC2=C1C=CC(=C2)O	7-Hydroxy-4-methylcoumarin	C10H8O3	Carbonic anhydrase XIV	Q9ULX7	CA14
53	90-33-5	CC1=CC(=O)OC2=C1C=CC(=C2)O	7-Hydroxy-4-methylcoumarin	C10H8O3	Monoamine oxidase B	P27338	MAOB
53	90-33-5	CC1=CC(=O)OC2=C1C=CC(=C2)O	7-Hydroxy-4-methylcoumarin	C10H8O3	Aldose reductase	P15121	AKR1B1
53	90-33-5	CC1=CC(=O)OC2=C1C=CC(=C2)O	7-Hydroxy-4-methylcoumarin	C10H8O3	D-amino-acid oxidase	P14920	DAO
53	90-33-5	CC1=CC(=O)OC2=C1C=CC(=C2)O	7-Hydroxy-4-methylcoumarin	C10H8O3	Carbonic anhydrase III	P07451	CA3
53	90-33-5	CC1=CC(=O)OC2=C1C=CC(=C2)O	7-Hydroxy-4-methylcoumarin	C10H8O3	Tyrosine-protein kinase FYN	P06241	FYN
53	90-33-5	CC1=CC(=O)OC2=C1C=CC(=C2)O	7-Hydroxy-4-methylcoumarin	C10H8O3	G protein-coupled receptor kinase 6	P43250	GRK6
53	90-33-5	CC1=CC(=O)OC2=C1C=CC(=C2)O	7-Hydroxy-4-methylcoumarin	C10H8O3	G-protein coupled receptor 35	Q9HC97	GPR35
53	90-33-5	CC1=CC(=O)OC2=C1C=CC(=C2)O	7-Hydroxy-4-methylcoumarin	C10H8O3	Platelet-derived growth factor receptor beta	P09619	PDGFRB
53	90-33-5	CC1=CC(=O)OC2=C1C=CC(=C2)O	7-Hydroxy-4-methylcoumarin	C10H8O3	Vascular endothelial growth factor receptor 3	P35916	FLT4
53	90-33-5	CC1=CC(=O)OC2=C1C=CC(=C2)O	7-Hydroxy-4-methylcoumarin	C10H8O3	Insulin-like growth factor I receptor	P08069	IGF1R
53	90-33-5	CC1=CC(=O)OC2=C1C=CC(=C2)O	7-Hydroxy-4-methylcoumarin	C10H8O3	Insulin receptor	P06213	INSR
53	90-33-5	CC1=CC(=O)OC2=C1C=CC(=C2)O	7-Hydroxy-4-methylcoumarin	C10H8O3	Focal adhesion kinase 1	Q05397	PTK2
53	90-33-5	CC1=CC(=O)OC2=C1C=CC(=C2)O	7-Hydroxy-4-methylcoumarin	C10H8O3	Tyrosine-protein kinase TIE-2	Q02763	TEK
53	90-33-5	CC1=CC(=O)OC2=C1C=CC(=C2)O	7-Hydroxy-4-methylcoumarin	C10H8O3	Mitogen-activated protein kinase kinase kinase 8	P41279	MAP3K8
53	90-33-5	CC1=CC(=O)OC2=C1C=CC(=C2)O	7-Hydroxy-4-methylcoumarin	C10H8O3	Heat shock 70 kDa protein 1	P0DMV8	HSPA1A
53	90-33-5	CC1=CC(=O)OC2=C1C=CC(=C2)O	7-Hydroxy-4-methylcoumarin	C10H8O3	NUAK family SNF1-like kinase 1	O60285	NUAK1
53	90-33-5	CC1=CC(=O)OC2=C1C=CC(=C2)O	7-Hydroxy-4-methylcoumarin	C10H8O3	Squalene monooxygenase (by homology)	Q14534	SQLE
53	90-33-5	CC1=CC(=O)OC2=C1C=CC(=C2)O	7-Hydroxy-4-methylcoumarin	C10H8O3	Tyrosine-protein kinase FGR (by homology)	P09769	FGR
53	90-33-5	CC1=CC(=O)OC2=C1C=CC(=C2)O	7-Hydroxy-4-methylcoumarin	C10H8O3	Tyrosine-protein kinase Lyn (by homology)	P07948	LYN
53	90-33-5	CC1=CC(=O)OC2=C1C=CC(=C2)O	7-Hydroxy-4-methylcoumarin	C10H8O3	Carbonic anhydrase VA	P35218	CA5A
53	90-33-5	CC1=CC(=O)OC2=C1C=CC(=C2)O	7-Hydroxy-4-methylcoumarin	C10H8O3	Monoamine oxidase A	P21397	MAOA
53	90-33-5	CC1=CC(=O)OC2=C1C=CC(=C2)O	7-Hydroxy-4-methylcoumarin	C10H8O3	ALK tyrosine kinase receptor	Q9UM73	ALK
53	90-33-5	CC1=CC(=O)OC2=C1C=CC(=C2)O	7-Hydroxy-4-methylcoumarin	C10H8O3	Tyrosine-protein kinase receptor UFO	P30530	AXL
53	90-33-5	CC1=CC(=O)OC2=C1C=CC(=C2)O	7-Hydroxy-4-methylcoumarin	C10H8O3	Cannabinoid receptor 1	P21554	CNR1
53	90-33-5	CC1=CC(=O)OC2=C1C=CC(=C2)O	7-Hydroxy-4-methylcoumarin	C10H8O3	Cannabinoid receptor 2	P34972	CNR2
53	90-33-5	CC1=CC(=O)OC2=C1C=CC(=C2)O	7-Hydroxy-4-methylcoumarin	C10H8O3	Macrophage migration inhibitory factor	P14174	MIF
53	90-33-5	CC1=CC(=O)OC2=C1C=CC(=C2)O	7-Hydroxy-4-methylcoumarin	C10H8O3	Serine/threonine-protein kinase Aurora-B	Q96GD4	AURKB
53	90-33-5	CC1=CC(=O)OC2=C1C=CC(=C2)O	7-Hydroxy-4-methylcoumarin	C10H8O3	Glutathione reductase	P00390	GSR
53	90-33-5	CC1=CC(=O)OC2=C1C=CC(=C2)O	7-Hydroxy-4-methylcoumarin	C10H8O3	Myoglobin	P02144	MB
53	90-33-5	CC1=CC(=O)OC2=C1C=CC(=C2)O	7-Hydroxy-4-methylcoumarin	C10H8O3	Xanthine dehydrogenase	P47989	XDH
53	90-33-5	CC1=CC(=O)OC2=C1C=CC(=C2)O	7-Hydroxy-4-methylcoumarin	C10H8O3	Serine/threonine-protein kinase B-raf	P15056	BRAF
53	90-33-5	CC1=CC(=O)OC2=C1C=CC(=C2)O	7-Hydroxy-4-methylcoumarin	C10H8O3	Fatty acid desaturase 1	O60427	FADS1
53	90-33-5	CC1=CC(=O)OC2=C1C=CC(=C2)O	7-Hydroxy-4-methylcoumarin	C10H8O3	Purine nucleoside phosphorylase (by homology)	P00491	PNP
53	90-33-5	CC1=CC(=O)OC2=C1C=CC(=C2)O	7-Hydroxy-4-methylcoumarin	C10H8O3	Cyclin-dependent kinase 2/cyclin A	P24941	CDK2
53	90-33-5	CC1=CC(=O)OC2=C1C=CC(=C2)O	7-Hydroxy-4-methylcoumarin	C10H8O3	Tyrosine-protein kinase LCK	P06239	LCK
53	90-33-5	CC1=CC(=O)OC2=C1C=CC(=C2)O	7-Hydroxy-4-methylcoumarin	C10H8O3	Succinate semialdehyde dehydrogenase	P51649	ALDH5A1
53	90-33-5	CC1=CC(=O)OC2=C1C=CC(=C2)O	7-Hydroxy-4-methylcoumarin	C10H8O3	Gamma-amino-N-butyrate transaminase	P80404	ABAT
53	90-33-5	CC1=CC(=O)OC2=C1C=CC(=C2)O	7-Hydroxy-4-methylcoumarin	C10H8O3	Catechol O-methyltransferase (by homology)	P21964	COMT
53	90-33-5	CC1=CC(=O)OC2=C1C=CC(=C2)O	7-Hydroxy-4-methylcoumarin	C10H8O3	Receptor protein-tyrosine kinase erbB-2	P04626	ERBB2
53	90-33-5	CC1=CC(=O)OC2=C1C=CC(=C2)O	7-Hydroxy-4-methylcoumarin	C10H8O3	Serine/threonine-protein kinase Aurora-A	O14965	AURKA
54	-	-	Methyl-atractylenolide II	C16H22O2	Gamma-aminobutyric acid receptor subunit alpha-1	P14867	GABRA1
54	-	-	Methyl-atractylenolide II	C16H22O2	Neuronal acetylcholine receptor protein, alpha-7 chain	P36544	CHRNA7
55	71629-00-0	CC1CCC2(C13CCCC3(C=C2C)C)C	Isocomene	C15H24	Anandamide amidohydrolase	O00519	FAAH
55	71629-00-0	CC1CCC2(C13CCCC3(C=C2C)C)C	Isocomene	C15H24	Androgen Receptor (by homology)	P10275	AR
55	71629-00-0	CC1CCC2(C13CCCC3(C=C2C)C)C	Isocomene	C15H24	Cannabinoid receptor 2	P34972	CNR2
55	71629-00-0	CC1CCC2(C13CCCC3(C=C2C)C)C	Isocomene	C15H24	Cytochrome P450 19A1	P11511	CYP19A1
55	71629-00-0	CC1CCC2(C13CCCC3(C=C2C)C)C	Isocomene	C15H24	Cytochrome P450 2C19	P33261	CYP2C19
55	71629-00-0	CC1CCC2(C13CCCC3(C=C2C)C)C	Isocomene	C15H24	Estrogen receptor alpha	P03372	ESR1
55	71629-00-0	CC1CCC2(C13CCCC3(C=C2C)C)C	Isocomene	C15H24	Muscarinic acetylcholine receptor M2	P08172	CHRM2
55	71629-00-0	CC1CCC2(C13CCCC3(C=C2C)C)C	Isocomene	C15H24	Norepinephrine transporter	P23975	SLC6A2
55	71629-00-0	CC1CCC2(C13CCCC3(C=C2C)C)C	Isocomene	C15H24	Nuclear receptor subfamily 1 group I member 3 (by homology)	Q14994	NR1I3
55	71629-00-0	CC1CCC2(C13CCCC3(C=C2C)C)C	Isocomene	C15H24	Peroxisome proliferator-activated receptor alpha	Q07869	PPARA
55	71629-00-0	CC1CCC2(C13CCCC3(C=C2C)C)C	Isocomene	C15H24	Serotonin transporter	P31645	SLC6A4
55	71629-00-0	CC1CCC2(C13CCCC3(C=C2C)C)C	Isocomene	C15H24	Vanilloid receptor	Q8NER1	TRPV1
56	2387-78-2	CC1CCC2CC3=C(CCC13C2(C)C)C	Cyperene	C15H24	Androgen Receptor (by homology)	P10275	AR
56	2387-78-2	CC1CCC2CC3=C(CCC13C2(C)C)C	Cyperene	C15H24	Butyrylcholinesterase	P06276	BCHE
56	2387-78-2	CC1CCC2CC3=C(CCC13C2(C)C)C	Cyperene	C15H24	Cannabinoid receptor 2	P34972	CNR2
56	2387-78-2	CC1CCC2CC3=C(CCC13C2(C)C)C	Cyperene	C15H24	Cytochrome P450 19A1	P11511	CYP19A1
56	2387-78-2	CC1CCC2CC3=C(CCC13C2(C)C)C	Cyperene	C15H24	Cytochrome P450 2C19	P33261	CYP2C19
56	2387-78-2	CC1CCC2CC3=C(CCC13C2(C)C)C	Cyperene	C15H24	Estrogen receptor alpha	P03372	ESR1
56	2387-78-2	CC1CCC2CC3=C(CCC13C2(C)C)C	Cyperene	C15H24	Muscarinic acetylcholine receptor M2	P08172	CHRM2
56	2387-78-2	CC1CCC2CC3=C(CCC13C2(C)C)C	Cyperene	C15H24	Norepinephrine transporter	P23975	SLC6A2
56	2387-78-2	CC1CCC2CC3=C(CCC13C2(C)C)C	Cyperene	C15H24	Nuclear receptor subfamily 1 group I member 3 (by homology)	Q14994	NR1I3
56	2387-78-2	CC1CCC2CC3=C(CCC13C2(C)C)C	Cyperene	C15H24	Peroxisome proliferator-activated receptor alpha	Q07869	PPARA
56	2387-78-2	CC1CCC2CC3=C(CCC13C2(C)C)C	Cyperene	C15H24	Serotonin transporter	P31645	SLC6A4
56	2387-78-2	CC1CCC2CC3=C(CCC13C2(C)C)C	Cyperene	C15H24	UDP-glucuronosyltransferase 2B7	P16662	UGT2B7
57	515-17-3	CC(=C1CCC2(CCCC(=C)C2C1)C)C	Ludovicin B	C15H24	Cannabinoid receptor 2	P34972	CNR2
57	515-17-3	CC(=C1CCC2(CCCC(=C)C2C1)C)C	Ludovicin B	C15H24	Peroxisome proliferator-activated receptor alpha	Q07869	PPARA
58	15423-57-1	CC1=CCCC(=CCC(=C(C)C)CC1)C	Germacrene B	C15H24	Adenosine A1 receptor	P30542	ADORA1
58	15423-57-1	CC1=CCCC(=CCC(=C(C)C)CC1)C	Germacrene B	C15H24	Adenosine A2a receptor	P29274	ADORA2A
58	15423-57-1	CC1=CCCC(=CCC(=C(C)C)CC1)C	Germacrene B	C15H24	Adenosine A3 receptor	P0DMS8	ADORA3
58	15423-57-1	CC1=CCCC(=CCC(=C(C)C)CC1)C	Germacrene B	C15H24	Cannabinoid receptor 2	P34972	CNR2
58	15423-57-1	CC1=CCCC(=CCC(=C(C)C)CC1)C	Germacrene B	C15H24	Peroxisome proliferator-activated receptor alpha	Q07869	PPARA
58	15423-57-1	CC1=CCCC(=CCC(=C(C)C)CC1)C	Germacrene B	C15H24	T-cell protein-tyrosine phosphatase	P17706	PTPN2
58	15423-57-1	CC1=CCCC(=CCC(=C(C)C)CC1)C	Germacrene B	C15H24	Vanilloid receptor	Q8NER1	TRPV1
58	15423-57-1	CC1=CCCC(=CCC(=C(C)C)CC1)C	Germacrene B	C15H24	Zinc finger protein GLI1	P08151	GLI1
58	15423-57-1	CC1=CCCC(=CCC(=C(C)C)CC1)C	Germacrene B	C15H24	Zinc finger protein GLI2	P10070	GLI2
59	27840-40-0	CC1CC=CC2=CCC(=C(C)C)CC12C	β-vetivenene	C15H22	Adenosine A1 receptor	P30542	ADORA1
59	27840-40-0	CC1CC=CC2=CCC(=C(C)C)CC12C	β-vetivenene	C15H22	Adenosine A2a receptor	P29274	ADORA2A
59	27840-40-0	CC1CC=CC2=CCC(=C(C)C)CC12C	β-vetivenene	C15H22	Adenosine A3 receptor	P0DMS8	ADORA3
59	27840-40-0	CC1CC=CC2=CCC(=C(C)C)CC12C	β-vetivenene	C15H22	Androgen Receptor	P10275	AR
59	27840-40-0	CC1CC=CC2=CCC(=C(C)C)CC12C	β-vetivenene	C15H22	Cytochrome P450 19A1	P11511	CYP19A1
59	27840-40-0	CC1CC=CC2=CCC(=C(C)C)CC12C	β-vetivenene	C15H22	Estrogen receptor alpha	P03372	ESR1
59	27840-40-0	CC1CC=CC2=CCC(=C(C)C)CC12C	β-vetivenene	C15H22	Estrogen receptor beta	Q92731	ESR2
60	1136-77-2	CC1=C2C(=CC=C1)C3=CC=CC(=C3O2)C	4,6-Dimethyl dibenzofuran	C14H12O	Cytochrome P450 2A6	P11509	CYP2A6
60	1136-77-2	CC1=C2C(=CC=C1)C3=CC=CC(=C3O2)C	4,6-Dimethyl dibenzofuran	C14H12O	Dopamine transporter	Q01959	SLC6A3
60	1136-77-2	CC1=C2C(=CC=C1)C3=CC=CC(=C3O2)C	4,6-Dimethyl dibenzofuran	C14H12O	Serotonin transporter	P31645	SLC6A4
61	88395-46-4	CC1=C2CCC(C2C3C(C3(C)C)CC1)(C)O	Isospathulenol	C15H24O	Acetylcholinesterase	P22303	ACHE
61	88395-46-4	CC1=C2CCC(C2C3C(C3(C)C)CC1)(C)O	Isospathulenol	C15H24O	Androgen Receptor	P10275	AR
61	88395-46-4	CC1=C2CCC(C2C3C(C3(C)C)CC1)(C)O	Isospathulenol	C15H24O	Corticosteroid binding globulin	P08185	SERPINA6
61	88395-46-4	CC1=C2CCC(C2C3C(C3(C)C)CC1)(C)O	Isospathulenol	C15H24O	Cytochrome P450 17A1	P05093	CYP17A1
61	88395-46-4	CC1=C2CCC(C2C3C(C3(C)C)CC1)(C)O	Isospathulenol	C15H24O	Cytochrome P450 19A1	P11511	CYP19A1
61	88395-46-4	CC1=C2CCC(C2C3C(C3(C)C)CC1)(C)O	Isospathulenol	C15H24O	Cytochrome P450 2C19	P33261	CYP2C19
61	88395-46-4	CC1=C2CCC(C2C3C(C3(C)C)CC1)(C)O	Isospathulenol	C15H24O	Cytochrome P450 51 (by homology)	Q16850	CYP51A1
61	88395-46-4	CC1=C2CCC(C2C3C(C3(C)C)CC1)(C)O	Isospathulenol	C15H24O	Estrogen receptor alpha	P03372	ESR1
61	88395-46-4	CC1=C2CCC(C2C3C(C3(C)C)CC1)(C)O	Isospathulenol	C15H24O	Estrogen receptor beta	Q92731	ESR2
61	88395-46-4	CC1=C2CCC(C2C3C(C3(C)C)CC1)(C)O	Isospathulenol	C15H24O	Glucose-6-phosphate 1-dehydrogenase	P11413	G6PD
61	88395-46-4	CC1=C2CCC(C2C3C(C3(C)C)CC1)(C)O	Isospathulenol	C15H24O	HMG-CoA reductase	P04035	HMGCR
61	88395-46-4	CC1=C2CCC(C2C3C(C3(C)C)CC1)(C)O	Isospathulenol	C15H24O	LXR-alpha	Q13133	NR1H3
61	88395-46-4	CC1=C2CCC(C2C3C(C3(C)C)CC1)(C)O	Isospathulenol	C15H24O	Muscarinic acetylcholine receptor M2	P08172	CHRM2
61	88395-46-4	CC1=C2CCC(C2C3C(C3(C)C)CC1)(C)O	Isospathulenol	C15H24O	Niemann-Pick C1-like protein 1	Q9UHC9	NPC1L1
61	88395-46-4	CC1=C2CCC(C2C3C(C3(C)C)CC1)(C)O	Isospathulenol	C15H24O	Norepinephrine transporter	P23975	SLC6A2
61	88395-46-4	CC1=C2CCC(C2C3C(C3(C)C)CC1)(C)O	Isospathulenol	C15H24O	Nuclear receptor ROR-alpha	P35398	RORA
61	88395-46-4	CC1=C2CCC(C2C3C(C3(C)C)CC1)(C)O	Isospathulenol	C15H24O	Nuclear receptor ROR-gamma	P51449	RORC
61	88395-46-4	CC1=C2CCC(C2C3C(C3(C)C)CC1)(C)O	Isospathulenol	C15H24O	Peroxisome proliferator-activated receptor alpha	Q07869	PPARA
61	88395-46-4	CC1=C2CCC(C2C3C(C3(C)C)CC1)(C)O	Isospathulenol	C15H24O	Peroxisome proliferator-activated receptor delta	Q03181	PPARD
61	88395-46-4	CC1=C2CCC(C2C3C(C3(C)C)CC1)(C)O	Isospathulenol	C15H24O	Prostanoid EP2 receptor (by homology)	P43116	PTGER2
61	88395-46-4	CC1=C2CCC(C2C3C(C3(C)C)CC1)(C)O	Isospathulenol	C15H24O	Protein-tyrosine phosphatase 1B	P18031	PTPN1
61	88395-46-4	CC1=C2CCC(C2C3C(C3(C)C)CC1)(C)O	Isospathulenol	C15H24O	Serotonin transporter	P31645	SLC6A4
61	88395-46-4	CC1=C2CCC(C2C3C(C3(C)C)CC1)(C)O	Isospathulenol	C15H24O	Sterol regulatory element-binding protein 2	Q12772	SREBF2
61	88395-46-4	CC1=C2CCC(C2C3C(C3(C)C)CC1)(C)O	Isospathulenol	C15H24O	Testis-specific androgen-binding protein	P04278	SHBG
61	88395-46-4	CC1=C2CCC(C2C3C(C3(C)C)CC1)(C)O	Isospathulenol	C15H24O	Transient receptor potential cation channel subfamily M member 8	Q7Z2W7	TRPM8
61	88395-46-4	CC1=C2CCC(C2C3C(C3(C)C)CC1)(C)O	Isospathulenol	C15H24O	UDP-glucuronosyltransferase 2B7	P16662	UGT2B7
62	-	CC(=C1CCC2(CC(=CC1)CCC2O)C)C	7R,8R-8-Hydroxy-4-isopropylidene-7-methylbicyclo[5.3.1]undec-1-ene	C15H24O	Acetylcholinesterase	P22303	ACHE
62	-	CC(=C1CCC2(CC(=CC1)CCC2O)C)C	7R,8R-8-Hydroxy-4-isopropylidene-7-methylbicyclo[5.3.1]undec-1-ene	C15H24O	Androgen Receptor	P10275	AR
62	-	CC(=C1CCC2(CC(=CC1)CCC2O)C)C	7R,8R-8-Hydroxy-4-isopropylidene-7-methylbicyclo[5.3.1]undec-1-ene	C15H24O	Butyrylcholinesterase	P06276	BCHE
62	-	CC(=C1CCC2(CC(=CC1)CCC2O)C)C	7R,8R-8-Hydroxy-4-isopropylidene-7-methylbicyclo[5.3.1]undec-1-ene	C15H24O	Cannabinoid receptor 1	P21554	CNR1
62	-	CC(=C1CCC2(CC(=CC1)CCC2O)C)C	7R,8R-8-Hydroxy-4-isopropylidene-7-methylbicyclo[5.3.1]undec-1-ene	C15H24O	Carboxylesterase 2	O00748	CES2
62	-	CC(=C1CCC2(CC(=CC1)CCC2O)C)C	7R,8R-8-Hydroxy-4-isopropylidene-7-methylbicyclo[5.3.1]undec-1-ene	C15H24O	Cyclooxygenase-1	P23219	PTGS1
62	-	CC(=C1CCC2(CC(=CC1)CCC2O)C)C	7R,8R-8-Hydroxy-4-isopropylidene-7-methylbicyclo[5.3.1]undec-1-ene	C15H24O	Cytochrome P450 17A1	P05093	CYP17A1
62	-	CC(=C1CCC2(CC(=CC1)CCC2O)C)C	7R,8R-8-Hydroxy-4-isopropylidene-7-methylbicyclo[5.3.1]undec-1-ene	C15H24O	Cytochrome P450 19A1	P11511	CYP19A1
62	-	CC(=C1CCC2(CC(=CC1)CCC2O)C)C	7R,8R-8-Hydroxy-4-isopropylidene-7-methylbicyclo[5.3.1]undec-1-ene	C15H24O	Cytochrome P450 51 (by homology)	Q16850	CYP51A1
62	-	CC(=C1CCC2(CC(=CC1)CCC2O)C)C	7R,8R-8-Hydroxy-4-isopropylidene-7-methylbicyclo[5.3.1]undec-1-ene	C15H24O	DNA polymerase beta (by homology)	P06746	POLB
62	-	CC(=C1CCC2(CC(=CC1)CCC2O)C)C	7R,8R-8-Hydroxy-4-isopropylidene-7-methylbicyclo[5.3.1]undec-1-ene	C15H24O	Estrogen receptor alpha	P03372	ESR1
62	-	CC(=C1CCC2(CC(=CC1)CCC2O)C)C	7R,8R-8-Hydroxy-4-isopropylidene-7-methylbicyclo[5.3.1]undec-1-ene	C15H24O	Estrogen receptor beta	Q92731	ESR2
62	-	CC(=C1CCC2(CC(=CC1)CCC2O)C)C	7R,8R-8-Hydroxy-4-isopropylidene-7-methylbicyclo[5.3.1]undec-1-ene	C15H24O	Fatty acid binding protein adipocyte	P15090	FABP4
62	-	CC(=C1CCC2(CC(=CC1)CCC2O)C)C	7R,8R-8-Hydroxy-4-isopropylidene-7-methylbicyclo[5.3.1]undec-1-ene	C15H24O	Fatty acid binding protein muscle	P05413	FABP3
62	-	CC(=C1CCC2(CC(=CC1)CCC2O)C)C	7R,8R-8-Hydroxy-4-isopropylidene-7-methylbicyclo[5.3.1]undec-1-ene	C15H24O	Free fatty acid receptor 1	O14842	FFAR1
62	-	CC(=C1CCC2(CC(=CC1)CCC2O)C)C	7R,8R-8-Hydroxy-4-isopropylidene-7-methylbicyclo[5.3.1]undec-1-ene	C15H24O	HMG-CoA reductase	P04035	HMGCR
62	-	CC(=C1CCC2(CC(=CC1)CCC2O)C)C	7R,8R-8-Hydroxy-4-isopropylidene-7-methylbicyclo[5.3.1]undec-1-ene	C15H24O	LXR-alpha	Q13133	NR1H3
62	-	CC(=C1CCC2(CC(=CC1)CCC2O)C)C	7R,8R-8-Hydroxy-4-isopropylidene-7-methylbicyclo[5.3.1]undec-1-ene	C15H24O	Muscarinic acetylcholine receptor M2	P08172	CHRM2
62	-	CC(=C1CCC2(CC(=CC1)CCC2O)C)C	7R,8R-8-Hydroxy-4-isopropylidene-7-methylbicyclo[5.3.1]undec-1-ene	C15H24O	Niemann-Pick C1-like protein 1	Q9UHC9	NPC1L1
62	-	CC(=C1CCC2(CC(=CC1)CCC2O)C)C	7R,8R-8-Hydroxy-4-isopropylidene-7-methylbicyclo[5.3.1]undec-1-ene	C15H24O	Norepinephrine transporter	P23975	SLC6A2
62	-	CC(=C1CCC2(CC(=CC1)CCC2O)C)C	7R,8R-8-Hydroxy-4-isopropylidene-7-methylbicyclo[5.3.1]undec-1-ene	C15H24O	Nuclear receptor subfamily 1 group I member 3 (by homology)	Q14994	NR1I3
62	-	CC(=C1CCC2(CC(=CC1)CCC2O)C)C	7R,8R-8-Hydroxy-4-isopropylidene-7-methylbicyclo[5.3.1]undec-1-ene	C15H24O	Peroxisome proliferator-activated receptor alpha	Q07869	PPARA
62	-	CC(=C1CCC2(CC(=CC1)CCC2O)C)C	7R,8R-8-Hydroxy-4-isopropylidene-7-methylbicyclo[5.3.1]undec-1-ene	C15H24O	Peroxisome proliferator-activated receptor delta	Q03181	PPARD
62	-	CC(=C1CCC2(CC(=CC1)CCC2O)C)C	7R,8R-8-Hydroxy-4-isopropylidene-7-methylbicyclo[5.3.1]undec-1-ene	C15H24O	Peroxisome proliferator-activated receptor gamma	P37231	PPARG
62	-	CC(=C1CCC2(CC(=CC1)CCC2O)C)C	7R,8R-8-Hydroxy-4-isopropylidene-7-methylbicyclo[5.3.1]undec-1-ene	C15H24O	Potassium-transporting ATPase alpha chain 2	P54707	ATP12A
62	-	CC(=C1CCC2(CC(=CC1)CCC2O)C)C	7R,8R-8-Hydroxy-4-isopropylidene-7-methylbicyclo[5.3.1]undec-1-ene	C15H24O	Protein-tyrosine phosphatase 1B	P18031	PTPN1
62	-	CC(=C1CCC2(CC(=CC1)CCC2O)C)C	7R,8R-8-Hydroxy-4-isopropylidene-7-methylbicyclo[5.3.1]undec-1-ene	C15H24O	RAS guanyl releasing protein 3	Q8IV61	RASGRP3
62	-	CC(=C1CCC2(CC(=CC1)CCC2O)C)C	7R,8R-8-Hydroxy-4-isopropylidene-7-methylbicyclo[5.3.1]undec-1-ene	C15H24O	Serotonin transporter	P31645	SLC6A4
62	-	CC(=C1CCC2(CC(=CC1)CCC2O)C)C	7R,8R-8-Hydroxy-4-isopropylidene-7-methylbicyclo[5.3.1]undec-1-ene	C15H24O	Squalene monooxygenase	Q14534	SQLE
62	-	CC(=C1CCC2(CC(=CC1)CCC2O)C)C	7R,8R-8-Hydroxy-4-isopropylidene-7-methylbicyclo[5.3.1]undec-1-ene	C15H24O	Sterol regulatory element-binding protein 2	Q12772	SREBF2
62	-	CC(=C1CCC2(CC(=CC1)CCC2O)C)C	7R,8R-8-Hydroxy-4-isopropylidene-7-methylbicyclo[5.3.1]undec-1-ene	C15H24O	Testis-specific androgen-binding protein	P04278	SHBG
62	-	CC(=C1CCC2(CC(=CC1)CCC2O)C)C	7R,8R-8-Hydroxy-4-isopropylidene-7-methylbicyclo[5.3.1]undec-1-ene	C15H24O	Transient receptor potential cation channel subfamily M member 8	Q7Z2W7	TRPM8
62	-	CC(=C1CCC2(CC(=CC1)CCC2O)C)C	7R,8R-8-Hydroxy-4-isopropylidene-7-methylbicyclo[5.3.1]undec-1-ene	C15H24O	UDP-glucuronosyltransferase 2B7	P16662	UGT2B7
63	-	CC1=CCCC2(C1=CC(CC2)C(=C)C)C	3,5,11-Eudesmatriene	C15H22	Adenosine A1 receptor	P30542	ADORA1
63	-	CC1=CCCC2(C1=CC(CC2)C(=C)C)C	3,5,11-Eudesmatriene	C15H22	Adenosine A2a receptor	P29274	ADORA2A
63	-	CC1=CCCC2(C1=CC(CC2)C(=C)C)C	3,5,11-Eudesmatriene	C15H22	Adenosine A3 receptor	P0DMS8	ADORA3
63	-	CC1=CCCC2(C1=CC(CC2)C(=C)C)C	3,5,11-Eudesmatriene	C15H22	Androgen Receptor	P10275	AR
63	-	CC1=CCCC2(C1=CC(CC2)C(=C)C)C	3,5,11-Eudesmatriene	C15H22	Cytochrome P450 19A1	P11511	CYP19A1
63	-	CC1=CCCC2(C1=CC(CC2)C(=C)C)C	3,5,11-Eudesmatriene	C15H22	Estrogen receptor alpha	P03372	ESR1
63	-	CC1=CCCC2(C1=CC(CC2)C(=C)C)C	3,5,11-Eudesmatriene	C15H22	Estrogen receptor beta	Q92731	ESR2
63	-	CC1=CCCC2(C1=CC(CC2)C(=C)C)C	3,5,11-Eudesmatriene	C15H22	Plasma retinol-binding protein	P02753	RBP4
64	-	-	Diatractyllactone	C30H38O4	Tubulin--tyrosine ligase	Q8NG68	TTL
64	-	-	Diatractyllactone	C30H38O4	Protein kinase C delta	Q05655	PRKCD
64	-	-	Diatractyllactone	C30H38O4	Isoleucyl-tRNA synthetase	P41252	IARS
64	-	-	Diatractyllactone	C30H38O4	Protein kinase C alpha	P17252	PRKCA
64	-	-	Diatractyllactone	C30H38O4	Programmed cell death protein 4	Q53EL6	PDCD4
64	-	-	Diatractyllactone	C30H38O4	Dual specificity protein phosphatase 3	P51452	DUSP3
64	-	-	Diatractyllactone	C30H38O4	Cathepsin K	P43235	CTSK
64	-	-	Diatractyllactone	C30H38O4	Cathepsin L	P07711	CTSL
64	-	-	Diatractyllactone	C30H38O4	Cathepsin (B and K)	P07858	CTSB
64	-	-	Diatractyllactone	C30H38O4	Orexin receptor 2	O43614	HCRTR2
64	-	-	Diatractyllactone	C30H38O4	Orexin receptor 1	O43613	HCRTR1
64	-	-	Diatractyllactone	C30H38O4	Serotonin 6 (5-HT6) receptor	P50406	HTR6
64	-	-	Diatractyllactone	C30H38O4	Translocator protein	P30536	TSPO
64	-	-	Diatractyllactone	C30H38O4	Phosphodiesterase 4D	Q08499	PDE4D
64	-	-	Diatractyllactone	C30H38O4	G protein-coupled receptor 44	Q9Y5Y4	PTGDR2
64	-	-	Diatractyllactone	C30H38O4	Hormone sensitive lipase	Q05469	LIPE
64	-	-	Diatractyllactone	C30H38O4	Protein-tyrosine phosphatase 1B	P18031	PTPN1
64	-	-	Diatractyllactone	C30H38O4	Beta amyloid A4 protein	P05067	APP
64	-	-	Diatractyllactone	C30H38O4	Metabotropic glutamate receptor 2	Q14416	GRM2
64	-	-	Diatractyllactone	C30H38O4	Muscarinic acetylcholine receptor M3	P20309	CHRM3
64	-	-	Diatractyllactone	C30H38O4	Epoxide hydratase	P34913	EPHX2
64	-	-	Diatractyllactone	C30H38O4	C-C chemokine receptor type 1	P32246	CCR1
64	-	-	Diatractyllactone	C30H38O4	Trace amine-associated receptor 1	Q96RJ0	TAAR1
64	-	-	Diatractyllactone	C30H38O4	Muscarinic acetylcholine receptor M4	P08173	CHRM4
64	-	-	Diatractyllactone	C30H38O4	Epoxide hydrolase 1	P07099	EPHX1
64	-	-	Diatractyllactone	C30H38O4	Muscarinic acetylcholine receptor M5	P08912	CHRM5
64	-	-	Diatractyllactone	C30H38O4	Muscarinic acetylcholine receptor M2	P08172	CHRM2
64	-	-	Diatractyllactone	C30H38O4	Muscarinic acetylcholine receptor M1	P11229	CHRM1
64	-	-	Diatractyllactone	C30H38O4	Adenosine A3 receptor	P0DMS8	ADORA3
64	-	-	Diatractyllactone	C30H38O4	Purinergic receptor P2Y1	P47900	P2RY1
64	-	-	Diatractyllactone	C30H38O4	Interleukin-8 receptor A	P25024	CXCR1
64	-	-	Diatractyllactone	C30H38O4	GABA-A receptor	P28472	GABRB3
64	-	-	Diatractyllactone	C30H38O4	Voltage-gated potassium channel subunit Kv1.5	P22460	KCNA5
64	-	-	Diatractyllactone	C30H38O4	Cyclooxygenase-2	P35354	PTGS2
64	-	-	Diatractyllactone	C30H38O4	Bile acid receptor FXR	Q96RI1	NR1H4
64	-	-	Diatractyllactone	C30H38O4	Polyadenylate-binding protein 1	P11940	PABPC1
64	-	-	Diatractyllactone	C30H38O4	Phosphodiesterase 7A	Q13946	PDE7A
64	-	-	Diatractyllactone	C30H38O4	Serotonin 2b (5-HT2b) receptor	P41595	HTR2B
64	-	-	Diatractyllactone	C30H38O4	Histamine H1 receptor	P35367	HRH1
64	-	-	Diatractyllactone	C30H38O4	HERG	Q12809	KCNH2
64	-	-	Diatractyllactone	C30H38O4	Sodium-dependent neutral amino acid transporter B(0)AT2	Q9H2J7	SLC6A15
64	-	-	Diatractyllactone	C30H38O4	Pregnane X receptor	O75469	NR1I2
64	-	-	Diatractyllactone	C30H38O4	5-lipoxygenase activating protein	P20292	ALOX5AP
64	-	-	Diatractyllactone	C30H38O4	Cytochrome P450 19A1	P11511	CYP19A1
64	-	-	Diatractyllactone	C30H38O4	Corticotropin releasing factor receptor 1	P34998	CRHR1
64	-	-	Diatractyllactone	C30H38O4	Voltage-gated L-type calcium channel alpha-1C subunit	Q13936	CACNA1C
64	-	-	Diatractyllactone	C30H38O4	Proto-oncogene c-JUN	P05412	JUN
64	-	-	Diatractyllactone	C30H38O4	Androgen Receptor	P10275	AR
64	-	-	Diatractyllactone	C30H38O4	Melatonin receptor 1A	P48039	MTNR1A
64	-	-	Diatractyllactone	C30H38O4	MAP kinase p38 alpha	Q16539	MAPK14
64	-	-	Diatractyllactone	C30H38O4	Sphingosine 1-phosphate receptor Edg-3	Q99500	S1PR3
64	-	-	Diatractyllactone	C30H38O4	MAP kinase p38 beta	Q15759	MAPK11
64	-	-	Diatractyllactone	C30H38O4	Proteinase-activated receptor 1	P25116	F2R
64	-	-	Diatractyllactone	C30H38O4	Short transient receptor potential channel 6	Q9Y210	TRPC6
64	-	-	Diatractyllactone	C30H38O4	Short transient receptor potential channel 3	Q13507	TRPC3
64	-	-	Diatractyllactone	C30H38O4	Kir3.1/Kir3.4	P48544	KCNJ5
64	-	-	Diatractyllactone	C30H38O4	Kir3.1/Kir3.2	P48051	KCNJ6
64	-	-	Diatractyllactone	C30H38O4	Sigma opioid receptor	Q99720	SIGMAR1
64	-	-	Diatractyllactone	C30H38O4	Cytochrome P450 2D6	P10635	CYP2D6
64	-	-	Diatractyllactone	C30H38O4	Vasopressin V1a receptor	P37288	AVPR1A
64	-	-	Diatractyllactone	C30H38O4	Isocitrate dehydrogenase [NADP] cytoplasmic	O75874	IDH1
64	-	-	Diatractyllactone	C30H38O4	Melatonin receptor 1B	P49286	MTNR1B
64	-	-	Diatractyllactone	C30H38O4	p53-binding protein Mdm-2	Q00987	MDM2
64	-	-	Diatractyllactone	C30H38O4	Phosphodiesterase 10A	Q9Y233	PDE10A
64	-	-	Diatractyllactone	C30H38O4	Vasopressin V2 receptor	P30518	AVPR2
64	-	-	Diatractyllactone	C30H38O4	6-phosphofructo-2-kinase/fructose-2,6-bisphosphatase 3	Q16875	PFKFB3
64	-	-	Diatractyllactone	C30H38O4	Vascular endothelial growth factor receptor 2	P35968	KDR
64	-	-	Diatractyllactone	C30H38O4	Cathepsin S	P25774	CTSS
64	-	-	Diatractyllactone	C30H38O4	Pantothenate kinase 3	Q9H999	PANK3
64	-	-	Diatractyllactone	C30H38O4	Heat shock protein HSP 90-alpha	P07900	HSP90AA1
64	-	-	Diatractyllactone	C30H38O4	Metabotropic glutamate receptor 5	P41594	GRM5
64	-	-	Diatractyllactone	C30H38O4	Neuropeptide Y receptor type 5	Q15761	NPY5R
64	-	-	Diatractyllactone	C30H38O4	Menin	O00255	MEN1
64	-	-	Diatractyllactone	C30H38O4	Cholesteryl ester transfer protein	P11597	CETP
64	-	-	Diatractyllactone	C30H38O4	Estradiol 17-beta-dehydrogenase 3	P37058	HSD17B3
64	-	-	Diatractyllactone	C30H38O4	Gamma-secretase	P49810	PSEN2
64	-	-	Diatractyllactone	C30H38O4	Transient receptor potential cation channel subfamily A member 1	O75762	TRPA1
64	-	-	Diatractyllactone	C30H38O4	Protein kinase C theta	Q04759	PRKCQ
64	-	-	Diatractyllactone	C30H38O4	Transitional endoplasmic reticulum ATPase	P55072	VCP
64	-	-	Diatractyllactone	C30H38O4	Nicotinamide phosphoribosyltransferase	P43490	NAMPT
64	-	-	Diatractyllactone	C30H38O4	Neurokinin 1 receptor	P25103	TACR1
64	-	-	Diatractyllactone	C30H38O4	LXR-alpha	Q13133	NR1H3
64	-	-	Diatractyllactone	C30H38O4	Serotonin 7 (5-HT7) receptor	P34969	HTR7
64	-	-	Diatractyllactone	C30H38O4	LXR-beta	P55055	NR1H2
64	-	-	Diatractyllactone	C30H38O4	Protein tyrosine kinase 2 beta	Q14289	PTK2B
64	-	-	Diatractyllactone	C30H38O4	Progesterone receptor	P06401	PGR
64	-	-	Diatractyllactone	C30H38O4	Epidermal growth factor receptor erbB1	P00533	EGFR
64	-	-	Diatractyllactone	C30H38O4	Tyrosine-protein kinase JAK3	P52333	JAK3
64	-	-	Diatractyllactone	C30H38O4	c-Jun N-terminal kinase 1	P45983	MAPK8
64	-	-	Diatractyllactone	C30H38O4	Tyrosine-protein kinase SRC	P12931	SRC
64	-	-	Diatractyllactone	C30H38O4	Tyrosine-protein kinase JAK2	O60674	JAK2
64	-	-	Diatractyllactone	C30H38O4	Aryl hydrocarbon receptor	P35869	AHR
64	-	-	Diatractyllactone	C30H38O4	Serine/threonine-protein kinase RAF	P04049	RAF1
64	-	-	Diatractyllactone	C30H38O4	Cytochrome P450 11B1	P15538	CYP11B1
64	-	-	Diatractyllactone	C30H38O4	Dihydroorotate dehydrogenase	Q02127	DHODH
64	-	-	Diatractyllactone	C30H38O4	Leukocyte elastase	P08246	ELANE
64	-	-	Diatractyllactone	C30H38O4	Carboxypeptidase B	P15086	CPB1
64	-	-	Diatractyllactone	C30H38O4	Cytochrome P450 11B2	P19099	CYP11B2
65	331-39-5	C1=CC(=C(C=C1/C=C/C(=O)O)O)O	Caffeic acid	C9H8O4	Prostaglandin G/H synthase 1	P23219	PTGS1
65	331-39-5	C1=CC(=C(C=C1/C=C/C(=O)O)O)O	Caffeic acid	C9H8O4	Muscarinic acetylcholine receptor M3	P20309	CHRM3
65	331-39-5	C1=CC(=C(C=C1/C=C/C(=O)O)O)O	Caffeic acid	C9H8O4	Muscarinic acetylcholine receptor M1	P11229	CHRM1
65	331-39-5	C1=CC(=C(C=C1/C=C/C(=O)O)O)O	Caffeic acid	C9H8O4	Beta-1 adrenergic receptor	P08588	ADRB1
65	331-39-5	C1=CC(=C(C=C1/C=C/C(=O)O)O)O	Caffeic acid	C9H8O4	Sodium channel protein type 5 subunit alpha	Q14524	SCN5A
65	331-39-5	C1=CC(=C(C=C1/C=C/C(=O)O)O)O	Caffeic acid	C9H8O4	Prostaglandin G/H synthase 2	P35354	PTGS2
65	331-39-5	C1=CC(=C(C=C1/C=C/C(=O)O)O)O	Caffeic acid	C9H8O4	Alpha-2A adrenergic receptor	P08913	ADRA2A
65	331-39-5	C1=CC(=C(C=C1/C=C/C(=O)O)O)O	Caffeic acid	C9H8O4	Retinoic acid receptor RXR-alpha	P19793	RXRA
65	331-39-5	C1=CC(=C(C=C1/C=C/C(=O)O)O)O	Caffeic acid	C9H8O4	5-hydroxytryptamine 2A receptor	P28223	HTR2A
65	331-39-5	C1=CC(=C(C=C1/C=C/C(=O)O)O)O	Caffeic acid	C9H8O4	Sodium-dependent noradrenaline transporter	P23975	SLC6A2
65	331-39-5	C1=CC(=C(C=C1/C=C/C(=O)O)O)O	Caffeic acid	C9H8O4	Alpha-1A adrenergic receptor	P35348	ADRA1A
65	331-39-5	C1=CC(=C(C=C1/C=C/C(=O)O)O)O	Caffeic acid	C9H8O4	Progesterone receptor	P06401	PGR
65	331-39-5	C1=CC(=C(C=C1/C=C/C(=O)O)O)O	Caffeic acid	C9H8O4	Muscarinic acetylcholine receptor M2	P08172	CHRM2
65	331-39-5	C1=CC(=C(C=C1/C=C/C(=O)O)O)O	Caffeic acid	C9H8O4	Alpha-1B adrenergic receptor	P35368	ADRA1B
65	331-39-5	C1=CC(=C(C=C1/C=C/C(=O)O)O)O	Caffeic acid	C9H8O4	Sodium-dependent dopamine transporter	Q01959	SLC6A3
65	331-39-5	C1=CC(=C(C=C1/C=C/C(=O)O)O)O	Caffeic acid	C9H8O4	Mineralocorticoid receptor	P08235	NR3C2
65	331-39-5	C1=CC(=C(C=C1/C=C/C(=O)O)O)O	Caffeic acid	C9H8O4	Beta-2 adrenergic receptor	P07550	ADRB2
65	331-39-5	C1=CC(=C(C=C1/C=C/C(=O)O)O)O	Caffeic acid	C9H8O4	Aldose reductase	P15121	AKR1B1
65	331-39-5	C1=CC(=C(C=C1/C=C/C(=O)O)O)O	Caffeic acid	C9H8O4	Gamma-aminobutyric-acid receptor subunit alpha-1	P14867	GABRA1
65	331-39-5	C1=CC(=C(C=C1/C=C/C(=O)O)O)O	Caffeic acid	C9H8O4	Urokinase-type plasminogen activator	P00749	PLAU
65	331-39-5	C1=CC(=C(C=C1/C=C/C(=O)O)O)O	Caffeic acid	C9H8O4	Leukotriene A-4 hydrolase	P09960	LTA4H
65	331-39-5	C1=CC(=C(C=C1/C=C/C(=O)O)O)O	Caffeic acid	C9H8O4	Amine oxidase [flavin-containing] B	P27338	MAOB
65	331-39-5	C1=CC(=C(C=C1/C=C/C(=O)O)O)O	Caffeic acid	C9H8O4	Amine oxidase [flavin-containing] A	P21397	MAOA
65	331-39-5	C1=CC(=C(C=C1/C=C/C(=O)O)O)O	Caffeic acid	C9H8O4	Neuronal acetylcholine receptor subunit alpha-7	P36544	CHRNA7
65	331-39-5	C1=CC(=C(C=C1/C=C/C(=O)O)O)O	Caffeic acid	C9H8O4	cAMP-dependent protein kinase catalytic subunit alpha	P17612	PRKACA
65	331-39-5	C1=CC(=C(C=C1/C=C/C(=O)O)O)O	Caffeic acid	C9H8O4	Ig gamma-1 chain C region	P01857	IGHG1
65	331-39-5	C1=CC(=C(C=C1/C=C/C(=O)O)O)O	Caffeic acid	C9H8O4	Chymotrypsinogen B	P17538	CTRB1
65	331-39-5	C1=CC(=C(C=C1/C=C/C(=O)O)O)O	Caffeic acid	C9H8O4	Nuclear receptor coactivator 2	Q15596	NCOA2
65	331-39-5	C1=CC(=C(C=C1/C=C/C(=O)O)O)O	Caffeic acid	C9H8O4	Nuclear receptor coactivator 1	Q15788	NCOA1
65	331-39-5	C1=CC(=C(C=C1/C=C/C(=O)O)O)O	Caffeic acid	C9H8O4	Cyclin-dependent kinase inhibitor 1B	P46527	CDKN1B
65	331-39-5	C1=CC(=C(C=C1/C=C/C(=O)O)O)O	Caffeic acid	C9H8O4	Cytochrome P450 19A1	P11511	CYP19A1
65	331-39-5	C1=CC(=C(C=C1/C=C/C(=O)O)O)O	Caffeic acid	C9H8O4	Hypoxia-inducible factor 1-alpha	Q16665	HIF1A
65	331-39-5	C1=CC(=C(C=C1/C=C/C(=O)O)O)O	Caffeic acid	C9H8O4	Integrin beta-5	P18084	ITGB5
65	331-39-5	C1=CC(=C(C=C1/C=C/C(=O)O)O)O	Caffeic acid	C9H8O4	Interferon alpha-1/13	P01562	IFNA1;
65	331-39-5	C1=CC(=C(C=C1/C=C/C(=O)O)O)O	Caffeic acid	C9H8O4	Leptin receptor	O15243	LEPROT
65	331-39-5	C1=CC(=C(C=C1/C=C/C(=O)O)O)O	Caffeic acid	C9H8O4	Matrix metalloproteinase-9	P14780	MMP9
65	331-39-5	C1=CC(=C(C=C1/C=C/C(=O)O)O)O	Caffeic acid	C9H8O4	Metalloproteinase inhibitor 2	P16035	TIMP2
65	331-39-5	C1=CC(=C(C=C1/C=C/C(=O)O)O)O	Caffeic acid	C9H8O4	NF-kappa-B inhibitor alpha	P25963	NFKBIA
65	331-39-5	C1=CC(=C(C=C1/C=C/C(=O)O)O)O	Caffeic acid	C9H8O4	Nitric oxide synthase, endothelial	P29474	NOS3
65	331-39-5	C1=CC(=C(C=C1/C=C/C(=O)O)O)O	Caffeic acid	C9H8O4	Perilipin-2	Q99541	PLIN2
65	331-39-5	C1=CC(=C(C=C1/C=C/C(=O)O)O)O	Caffeic acid	C9H8O4	Peroxisome proliferator-activated receptor gamma	P37231	PPARG
65	331-39-5	C1=CC(=C(C=C1/C=C/C(=O)O)O)O	Caffeic acid	C9H8O4	Platelet-derived growth factor subunit A	P04085	PDGFA
65	331-39-5	C1=CC(=C(C=C1/C=C/C(=O)O)O)O	Caffeic acid	C9H8O4	Proteinase-activated receptor 1	P25116	F2R
65	331-39-5	C1=CC(=C(C=C1/C=C/C(=O)O)O)O	Caffeic acid	C9H8O4	Protein kinase C alpha type	P17252	PRKCA
65	331-39-5	C1=CC(=C(C=C1/C=C/C(=O)O)O)O	Caffeic acid	C9H8O4	Proto-oncogene c-Fos	P01100	FOS
65	331-39-5	C1=CC(=C(C=C1/C=C/C(=O)O)O)O	Caffeic acid	C9H8O4	RAC-alpha serine/threonine-protein kinase	P31749	AKT1
65	331-39-5	C1=CC(=C(C=C1/C=C/C(=O)O)O)O	Caffeic acid	C9H8O4	Serine/threonine-protein kinase Chk2	O96017	CHEK2
65	331-39-5	C1=CC(=C(C=C1/C=C/C(=O)O)O)O	Caffeic acid	C9H8O4	Signal transducer and activator of transcription 3	P40763	STAT3
65	331-39-5	C1=CC(=C(C=C1/C=C/C(=O)O)O)O	Caffeic acid	C9H8O4	Transcription factor p65	Q04206	RELA
65	331-39-5	C1=CC(=C(C=C1/C=C/C(=O)O)O)O	Caffeic acid	C9H8O4	Tumor necrosis factor receptor superfamily member 6	O95407	TNFRSF6B
66	3867-18-3	C=CC1=CC=CC=C1N	2-Aminostyrene	C8H9N	Monoamine oxidase A	P21397	MAOA
66	3867-18-3	C=CC1=CC=CC=C1N	2-Aminostyrene	C8H9N	Monoamine oxidase B	P27338	MAOB
67		CC(=CCCC(=CCC1=C(C=CC(=C1)OC)O)C)C	2-(3,7-Dimethyl-octa-2,6-dienyl)-4-methoxy-phenol	C17H24O2	Arachidonate 5-lipoxygenase	P09917	ALOX5
67		CC(=CCCC(=CCC1=C(C=CC(=C1)OC)O)C)C	2-(3,7-Dimethyl-octa-2,6-dienyl)-4-methoxy-phenol	C17H24O2	Arachidonate 15-lipoxygenase	P16050	ALOX15
67		CC(=CCCC(=CCC1=C(C=CC(=C1)OC)O)C)C	2-(3,7-Dimethyl-octa-2,6-dienyl)-4-methoxy-phenol	C17H24O2	Cholesteryl ester transfer protein	P11597	CETP
67		CC(=CCCC(=CCC1=C(C=CC(=C1)OC)O)C)C	2-(3,7-Dimethyl-octa-2,6-dienyl)-4-methoxy-phenol	C17H24O2	Cannabinoid receptor 2	P34972	CNR2
67		CC(=CCCC(=CCC1=C(C=CC(=C1)OC)O)C)C	2-(3,7-Dimethyl-octa-2,6-dienyl)-4-methoxy-phenol	C17H24O2	Cannabinoid receptor 1	P21554	CNR1
67		CC(=CCCC(=CCC1=C(C=CC(=C1)OC)O)C)C	2-(3,7-Dimethyl-octa-2,6-dienyl)-4-methoxy-phenol	C17H24O2	Melatonin receptor 1A	P48039	MTNR1A
67		CC(=CCCC(=CCC1=C(C=CC(=C1)OC)O)C)C	2-(3,7-Dimethyl-octa-2,6-dienyl)-4-methoxy-phenol	C17H24O2	Melatonin receptor 1B	P49286	MTNR1B
67		CC(=CCCC(=CCC1=C(C=CC(=C1)OC)O)C)C	2-(3,7-Dimethyl-octa-2,6-dienyl)-4-methoxy-phenol	C17H24O2	Kinesin-like protein 1	P52732	KIF11
67		CC(=CCCC(=CCC1=C(C=CC(=C1)OC)O)C)C	2-(3,7-Dimethyl-octa-2,6-dienyl)-4-methoxy-phenol	C17H24O2	Epoxide hydratase	P34913	EPHX2
67		CC(=CCCC(=CCC1=C(C=CC(=C1)OC)O)C)C	2-(3,7-Dimethyl-octa-2,6-dienyl)-4-methoxy-phenol	C17H24O2	Dopamine D1 receptor	P21728	DRD1
67		CC(=CCCC(=CCC1=C(C=CC(=C1)OC)O)C)C	2-(3,7-Dimethyl-octa-2,6-dienyl)-4-methoxy-phenol	C17H24O2	Melanocortin receptor 4	P32245	MC4R
67		CC(=CCCC(=CCC1=C(C=CC(=C1)OC)O)C)C	2-(3,7-Dimethyl-octa-2,6-dienyl)-4-methoxy-phenol	C17H24O2	NAD-dependent deacetylase sirtuin 2	Q8IXJ6	SIRT2
67		CC(=CCCC(=CCC1=C(C=CC(=C1)OC)O)C)C	2-(3,7-Dimethyl-octa-2,6-dienyl)-4-methoxy-phenol	C17H24O2	Estradiol 17-beta-dehydrogenase 2	P37059	HSD17B2
67		CC(=CCCC(=CCC1=C(C=CC(=C1)OC)O)C)C	2-(3,7-Dimethyl-octa-2,6-dienyl)-4-methoxy-phenol	C17H24O2	Dopamine D5 receptor	P21918	DRD5
67		CC(=CCCC(=CCC1=C(C=CC(=C1)OC)O)C)C	2-(3,7-Dimethyl-octa-2,6-dienyl)-4-methoxy-phenol	C17H24O2	Dopamine D2 receptor	P14416	DRD2
67		CC(=CCCC(=CCC1=C(C=CC(=C1)OC)O)C)C	2-(3,7-Dimethyl-octa-2,6-dienyl)-4-methoxy-phenol	C17H24O2	Metabotropic glutamate receptor 2	Q14416	GRM2
67		CC(=CCCC(=CCC1=C(C=CC(=C1)OC)O)C)C	2-(3,7-Dimethyl-octa-2,6-dienyl)-4-methoxy-phenol	C17H24O2	Carbonic anhydrase I	P00915	CA1
67		CC(=CCCC(=CCC1=C(C=CC(=C1)OC)O)C)C	2-(3,7-Dimethyl-octa-2,6-dienyl)-4-methoxy-phenol	C17H24O2	Carbonic anhydrase XII	O43570	CA12
67		CC(=CCCC(=CCC1=C(C=CC(=C1)OC)O)C)C	2-(3,7-Dimethyl-octa-2,6-dienyl)-4-methoxy-phenol	C17H24O2	Carbonic anhydrase IX	Q16790	CA9
67		CC(=CCCC(=CCC1=C(C=CC(=C1)OC)O)C)C	2-(3,7-Dimethyl-octa-2,6-dienyl)-4-methoxy-phenol	C17H24O2	Thromboxane A2 receptor	P21731	TBXA2R
67		CC(=CCCC(=CCC1=C(C=CC(=C1)OC)O)C)C	2-(3,7-Dimethyl-octa-2,6-dienyl)-4-methoxy-phenol	C17H24O2	Histone deacetylase 8	Q9BY41	HDAC8
67		CC(=CCCC(=CCC1=C(C=CC(=C1)OC)O)C)C	2-(3,7-Dimethyl-octa-2,6-dienyl)-4-methoxy-phenol	C17H24O2	Serine/threonine-protein kinase AKT	P31749	AKT1
67		CC(=CCCC(=CCC1=C(C=CC(=C1)OC)O)C)C	2-(3,7-Dimethyl-octa-2,6-dienyl)-4-methoxy-phenol	C17H24O2	Fibroblast growth factor receptor 1	P11362	FGFR1
67		CC(=CCCC(=CCC1=C(C=CC(=C1)OC)O)C)C	2-(3,7-Dimethyl-octa-2,6-dienyl)-4-methoxy-phenol	C17H24O2	PH domain leucine-rich repeat-containing protein phosphatase 1	O60346	PHLPP1
67		CC(=CCCC(=CCC1=C(C=CC(=C1)OC)O)C)C	2-(3,7-Dimethyl-octa-2,6-dienyl)-4-methoxy-phenol	C17H24O2	Serine/threonine-protein kinase ILK-1	Q13418	ILK
68	-	CC1=C2C[C@]3(C)C(CCCC3=C)C3O[C@@]23OC1=O	8,9-epoxy atracolactone	C20H36O7	Phospholipase A2 group 1B	P04054	PLA2G1B
68	-	CC1=C2C[C@]3(C)C(CCCC3=C)C3O[C@@]23OC1=O	8,9-epoxy atracolactone	C20H36O7	Tubulin--tyrosine ligase	Q8NG68	TTL
68	-	CC1=C2C[C@]3(C)C(CCCC3=C)C3O[C@@]23OC1=O	8,9-epoxy atracolactone	C20H36O7	MAP kinase ERK2	P28482	MAPK1
68	-	CC1=C2C[C@]3(C)C(CCCC3=C)C3O[C@@]23OC1=O	8,9-epoxy atracolactone	C20H36O7	Cyclin-dependent kinase 2/cyclin A	P24941	CDK2
68	-	CC1=C2C[C@]3(C)C(CCCC3=C)C3O[C@@]23OC1=O	8,9-epoxy atracolactone	C20H36O7	Arachidonate 5-lipoxygenase	P09917	ALOX5
68	-	CC1=C2C[C@]3(C)C(CCCC3=C)C3O[C@@]23OC1=O	8,9-epoxy atracolactone	C20H36O7	Carbonic anhydrase II	P00918	CA2
68	-	CC1=C2C[C@]3(C)C(CCCC3=C)C3O[C@@]23OC1=O	8,9-epoxy atracolactone	C20H36O7	Carbonic anhydrase I	P00915	CA1
68	-	CC1=C2C[C@]3(C)C(CCCC3=C)C3O[C@@]23OC1=O	8,9-epoxy atracolactone	C20H36O7	Glycine receptor subunit alpha-2	P23416	GLRA2
68	-	CC1=C2C[C@]3(C)C(CCCC3=C)C3O[C@@]23OC1=O	8,9-epoxy atracolactone	C20H36O7	Voltage-gated N-type calcium channel alpha-1B subunit	Q00975	CACNA1B
68	-	CC1=C2C[C@]3(C)C(CCCC3=C)C3O[C@@]23OC1=O	8,9-epoxy atracolactone	C20H36O7	MAP kinase p38 alpha	Q16539	MAPK14
68	-	CC1=C2C[C@]3(C)C(CCCC3=C)C3O[C@@]23OC1=O	8,9-epoxy atracolactone	C20H36O7	Serine/threonine-protein kinase Aurora-A	O14965	AURKA
68	-	CC1=C2C[C@]3(C)C(CCCC3=C)C3O[C@@]23OC1=O	8,9-epoxy atracolactone	C20H36O7	Monoamine oxidase B	P27338	MAOB
68	-	CC1=C2C[C@]3(C)C(CCCC3=C)C3O[C@@]23OC1=O	8,9-epoxy atracolactone	C20H36O7	Histone deacetylase 5	Q9UQL6	HDAC5
68	-	CC1=C2C[C@]3(C)C(CCCC3=C)C3O[C@@]23OC1=O	8,9-epoxy atracolactone	C20H36O7	Histone deacetylase 7	Q8WUI4	HDAC7
68	-	CC1=C2C[C@]3(C)C(CCCC3=C)C3O[C@@]23OC1=O	8,9-epoxy atracolactone	C20H36O7	CDK8/Cyclin C	P24863	CCNC
68	-	CC1=C2C[C@]3(C)C(CCCC3=C)C3O[C@@]23OC1=O	8,9-epoxy atracolactone	C20H36O7	Histone deacetylase 4	P56524	HDAC4
69		CC1=CCC2=C1CC1C(C)=CCCC1(C)C2=O	Furan sesquiterpene	C16H20O	Cytochrome P450 19A1	P11511	CYP19A1
69		CC1=CCC2=C1CC1C(C)=CCCC1(C)C2=O	Furan sesquiterpene	C16H20O	Androgen Receptor	P10275	AR
69		CC1=CCC2=C1CC1C(C)=CCCC1(C)C2=O	Furan sesquiterpene	C16H20O	Progesterone receptor	P06401	PGR
69		CC1=CCC2=C1CC1C(C)=CCCC1(C)C2=O	Furan sesquiterpene	C16H20O	Testis-specific androgen-binding protein	P04278	SHBG
69		CC1=CCC2=C1CC1C(C)=CCCC1(C)C2=O	Furan sesquiterpene	C16H20O	Alcohol dehydrogenase alpha chain	P07327	ADH1A
69		CC1=CCC2=C1CC1C(C)=CCCC1(C)C2=O	Furan sesquiterpene	C16H20O	Muscarinic acetylcholine receptor M2	P08172	CHRM2
69		CC1=CCC2=C1CC1C(C)=CCCC1(C)C2=O	Furan sesquiterpene	C16H20O	Muscarinic acetylcholine receptor M1	P11229	CHRM1
69		CC1=CCC2=C1CC1C(C)=CCCC1(C)C2=O	Furan sesquiterpene	C16H20O	Prolyl endopeptidase	P48147	PREP
69		CC1=CCC2=C1CC1C(C)=CCCC1(C)C2=O	Furan sesquiterpene	C16H20O	Metabotropic glutamate receptor 5	P41594	GRM5
69		CC1=CCC2=C1CC1C(C)=CCCC1(C)C2=O	Furan sesquiterpene	C16H20O	Glucocorticoid receptor	P04150	NR3C1
69		CC1=CCC2=C1CC1C(C)=CCCC1(C)C2=O	Furan sesquiterpene	C16H20O	Dopamine D2 receptor	P14416	DRD2
69		CC1=CCC2=C1CC1C(C)=CCCC1(C)C2=O	Furan sesquiterpene	C16H20O	Dopamine D4 receptor	P21917	DRD4
69		CC1=CCC2=C1CC1C(C)=CCCC1(C)C2=O	Furan sesquiterpene	C16H20O	Thymidylate synthase	P04818	TYMS
69		CC1=CCC2=C1CC1C(C)=CCCC1(C)C2=O	Furan sesquiterpene	C16H20O	Epoxide hydrolase 1	P07099	EPHX1
69		CC1=CCC2=C1CC1C(C)=CCCC1(C)C2=O	Furan sesquiterpene	C16H20O	Melatonin receptor 1A	P48039	MTNR1A
69		CC1=CCC2=C1CC1C(C)=CCCC1(C)C2=O	Furan sesquiterpene	C16H20O	Melatonin receptor 1B	P49286	MTNR1B
69		CC1=CCC2=C1CC1C(C)=CCCC1(C)C2=O	Furan sesquiterpene	C16H20O	Mineralocorticoid receptor	P08235	NR3C2
69		CC1=CCC2=C1CC1C(C)=CCCC1(C)C2=O	Furan sesquiterpene	C16H20O	P2X purinoceptor 7	Q99572	P2RX7
69		CC1=CCC2=C1CC1C(C)=CCCC1(C)C2=O	Furan sesquiterpene	C16H20O	Transient receptor potential cation channel subfamily A member 1	O75762	TRPA1
69		CC1=CCC2=C1CC1C(C)=CCCC1(C)C2=O	Furan sesquiterpene	C16H20O	Cathepsin K	P43235	CTSK
69		CC1=CCC2=C1CC1C(C)=CCCC1(C)C2=O	Furan sesquiterpene	C16H20O	Serotonin 7 (5-HT7) receptor	P34969	HTR7
69		CC1=CCC2=C1CC1C(C)=CCCC1(C)C2=O	Furan sesquiterpene	C16H20O	Cathepsin L	P07711	CTSL
69		CC1=CCC2=C1CC1C(C)=CCCC1(C)C2=O	Furan sesquiterpene	C16H20O	Cathepsin (B and K)	P07858	CTSB
